# Supplementary material for: Chemometric modeling of the lowest observed effect level (LOEL) and no observed effect level (NOEL) for rat toxicity
Source: Royal Society of Chemistry journal article supplement (doi:10.1039/d3va00265a), 2024-01-01
Supplement: d3va00265a1.xlsx [file d3va00265a1.xlsx]

## Sheet: Sheet1
								Chemometric Modeling of Lowest Observed Effect Level (LOEL) and No Observed Effect Level (NOEL) for Rat Toxicity
					Ankur Kumara, Probir Kumar Ojhaa, Kunal Royb*
					aDrug Discovery and Development Laboratory,
					Department of Pharmaceutical Technology, Jadavpur University,
					Kolkata 700032, India
					bDrug Theoretics and Cheminformatics (DTC) Laboratory,
					Department of Pharmaceutical Technology, Jadavpur University,
					Kolkata 700032, India
						Supplementary Information SI-1

## Sheet: Dataset 1
Compound No.	Caninical smile	IUPAC	CAS No	Tested Species	pLOEL (experimental)
1	C1[C@@H]2[C@H]3[C@@H]([C@H]1[C@H]4[C@@H]2O4)[C@]5(C(=C([C@@]3(C5(Cl)Cl)Cl)Cl)Cl)Cl	(1R,2S,3S,6R,7R,8S,9S,11R)-3,4,5,6,13,13-hexachloro-10-oxapentacyclo[6.3.1.13,6.02,7.09,11]tridec-4-ene	60-57-1	rat	3.88184
2	CCOP(=S)(OCC)SCCSCC	diethoxy-(2-ethylsulfanylethylsulfanyl)-sulfanylidene-lambda5-phosphane	298-04-4	rat	3.43846
3	CCOP(=S)(OCC)OC1=NC2=CC=CC=C2N=C1	diethoxy-quinoxalin-2-yloxy-sulfanylidene-lambda5-phosphane	13593-03-8	mouse	3.29861
4	C1C2C(C(C1Cl)Cl)C3(C(=C(C2(C3(Cl)Cl)Cl)Cl)Cl)Cl	1,3,4,7,8,9,10,10-octachlorotricyclo[5.2.1.02,6]dec-8-ene	57-74-9	rat	3.17637
5	COP(=S)(OC)OC1=CC=C(C=C1)[N+](=O)[O-]	dimethoxy-(4-nitrophenoxy)-sulfanylidene-lambda5-phosphane	298-00-0	rat	3.0224
6	CNC(=O)CSP(=S)(OC)OC	2-dimethoxyphosphinothioylsulfanyl-N-methylacetamide	60-51-5	rat	2.96245
7	C1C=C2C(=CC(=O)O2)C(O1)O	4-hydroxy-4,6-dihydrofuro[3,2-c]pyran-2-one	149-29-1	rat	2.88686
8	C12(C3(C4(C5(C3(C(C1(C5(C2(C4(Cl)Cl)Cl)Cl)Cl)(Cl)Cl)Cl)Cl)Cl)Cl)Cl	1,2,3,4,5,5,6,7,8,9,10,10-dodecachloropentacyclo[5.3.0.02,6.03,9.04,8]decane	2385-85-5	mouse	2.8023
9	C12C3C(C4C1C5(C(C3(C4(C5(Cl)Cl)Cl)Cl)Cl)Cl)C6C2O6	3,4,5,6,6,7-hexachloro-12-oxahexacyclo[6.5.0.02,10.03,7.05,9.011,13]tridecane	13366-73-9	rat	2.73571
10	C1C[N+]2=CC=CC=C2C3=CC=CC=[N+]31.[Br-].[Br-]	7,10-diazoniatricyclo[8.4.0.02,7]tetradeca-1(14),2,4,6,10,12-hexaene;dibromide	85-00-7	rat	2.502
11	CCCCSP(=O)(SCCCC)SCCCC	1-bis(butylsulfanyl)phosphorylsulfanylbutane	78-48-8	rat	2.40081
12	CC1(C(C1C(=O)OC(C#N)C2=CC(=CC=C2)OC3=CC=CC=C3)C(C(Br)(Br)Br)Br)C	[cyano-(3-phenoxyphenyl)methyl] 2,2-dimethyl-3-(1,2,2,2-tetrabromoethyl)cyclopropane-1-carboxylate	66841-25-6	rat	2.34571
13	COP(=O)(OC)OC(C(Cl)(Cl)Br)Br	(1,2-dibromo-2,2-dichloroethyl) dimethyl phosphate	300-76-5	rat	2.27964
14	CCOP(=S)(CC)SC1=CC=CC=C1	ethoxy-ethyl-phenylsulfanyl-sulfanylidene-lambda5-phosphane	944-22-9	rat	2.19291
15	COC1=NN(C(=O)S1)CSP(=S)(OC)OC	3-(dimethoxyphosphinothioylsulfanylmethyl)-5-methoxy-1,3,4-thiadiazol-2-one	950-37-8	rat	2.17951
16	CCN(CC)C1=NC(=CC(=N1)OP(=S)(OC)OC)C	4-dimethoxyphosphinothioyloxy-N,N-diethyl-6-methylpyrimidin-2-amine	29232-93-7	rat	2.0869
17	CCOC1=C(C=CC(=C1)OC2=C(C=C(C=C2)C(F)(F)F)Cl)[N+](=O)[O-]	2-chloro-1-(3-ethoxy-4-nitrophenoxy)-4-(trifluoromethyl)benzene	42874-03-3	mouse	2.08125
18	CCOC(=O)C(C)OC1=CC=C(C=C1)OC2=CN=C3C=C(C=CC3=N2)Cl	ethyl 2-[4-(6-chloroquinoxalin-2-yl)oxyphenoxy]propanoate	76578-14-8	rat	2.00331
19	CCOP(=S)(OCC)OC1=CC=C(C=C1)[N+](=O)[O-]	diethoxy-(4-nitrophenoxy)-sulfanylidene-lambda5-phosphane	56-38-2	rat	1.92026
20	CC(C)(C)C1=CC(=C(C=C1)OP(=O)(NC)OC)Cl	N-[(4-tert-butyl-2-chlorophenoxy)-methoxyphosphoryl]methanamine	299-86-5	rat	1.86294
21	CC(C)OC1=C(C=C(C(=C1)N2C(=O)OC(=N2)C(C)(C)C)Cl)Cl	5-tert-butyl-3-(2,4-dichloro-5-propan-2-yloxyphenyl)-1,3,4-oxadiazol-2-one	19666-30-9	rat	1.83916
22	CCN(CC)C(=O)SCC1=CC=C(C=C1)Cl	S-[(4-chlorophenyl)methyl] N,N-diethylcarbamothioate	28249-77-6	rat	1.71233
23	C1=CC=C(C=C1)C2=CC=CC=C2Cl	1-chloro-2-phenylbenzene	27323-18-8	rat	1.67362
24	CNC(=O)O/N=C(/C(=O)N(C)C)\SC	methyl (1Z)-2-(dimethylamino)-N-(methylcarbamoyloxy)-2-oxoethanimidothioate	23135-22-0	rat	1.64207
25	CN(C)C(=O)NC1=CC(=C(C=C1)Cl)Cl	3-(3,4-dichlorophenyl)-1,1-dimethylurea	330-54-1	rat	1.58941
26	C1=CC(=C(C(=C1)F)C(=O)NC(=O)NC2=CC=C(C=C2)Cl)F	N-[(4-chlorophenyl)carbamoyl]-2,6-difluorobenzamide	35367-38-5	rat	1.58925
27	CC(C)OC(=O)C(C1=CC=C(C=C1)Cl)(C2=CC=C(C=C2)Cl)O	propan-2-yl 2,2-bis(4-chlorophenyl)-2-hydroxyacetate	5836.10-2	rat	1.57625
28	CC(C)N(C(C)C)C(=O)SCC(=C(Cl)Cl)Cl	S-(2,3,3-trichloroprop-2-enyl) N,N-di(propan-2-yl)carbamothioate	2303-17-5	mouse	1.52962
29	CC(C(=O)O)OC1=CC(=C(C=C1Cl)Cl)Cl	2-(2,4,5-trichlorophenoxy)propanoic acid	93-72-1	rat	1.49106
30	ClC(Cl)C(Cl)(Cl)SN1C(=O)[C@H]2CC=CC[C@H]2C1=O		191906	rat	1.46373
31	C1(=C(C(=C(C(=C1Cl)Cl)Cl)Cl)Cl)O	2,3,4,5,6-pentachlorophenol	87-86-5	mouse	1.4254
32	C1=C(C(=CC(=C1Cl)Cl)Cl)OCC(=O)O	2-(2,4,5-trichlorophenoxy)acetic acid	93-76-5	rat	1.40736
33	CCN(CC)C(=O)C(=C(C)OP(=O)(OC)OC)Cl	[3-chloro-4-(diethylamino)-4-oxobut-2-en-2-yl] dimethyl phosphate	13171-21-6	rat	1.38681
34	CC1=C(S(=O)(=O)CCS1(=O)=O)C	5,6-dimethyl-2,3-dihydro-1,4-dithiine 1,1,4,4-tetraoxide	55290-64-7	rat	1.32284
35	COC(=O)NC1=NC2=C(N1)C=C(C=C2)SC3=CC=CC=C3	methyl N-(6-phenylsulfanyl-1H-benzimidazol-2-yl)carbamate	43210-67-9	rat	1.30013
36	CC1=C(C=C(C=C1)[N+](=O)[O-])N	2-methyl-5-nitroaniline	99-55-8	rat	1.27924
37	CCC1=C(C(=CC=C1)CC)N(COC)C(=O)CCl	2-chloro-N-(2,6-diethylphenyl)-N-(methoxymethyl)acetamide	15972-60-8	rat	1.25495
38	C/C(=N\OC(=O)NC)/SC	methyl (1E)-N-(methylcarbamoyloxy)ethanimidothioate	16752-77-5	rat	1.21016
39	CCNC1=NC(=NC(=N1)SC)NC(C)(C)C	2-N-tert-butyl-4-N-ethyl-6-methylsulfanyl-1,3,5-triazine-2,4-diamine	886-50-0	rat	1.20666
40	COP(=S)(OC)SCN1C(=O)C2=CC=CC=C2C1=O	2-(dimethoxyphosphinothioylsulfanylmethyl)isoindole-1,3-dione	732-11-6	rat	1.20051
41	CC1=NC(=NC(=N1)OC)NC(=O)NS(=O)(=O)C2=C(SC=C2)C(=O)OC	methyl 3-[(4-methoxy-6-methyl-1,3,5-triazin-2-yl)carbamoylsulfamoyl]thiophene-2-carboxylate	79277-27-3	rat	1.19026
42	CC1=NC(=NC(=N1)OC)NC(=O)NS(=O)(=O)C2=CC=CC=C2Cl	1-(2-chlorophenyl)sulfonyl-3-(4-methoxy-6-methyl-1,3,5-triazin-2-yl)urea	64902-72-3	rat	1.15571
43	CCCC1COC(O1)(CN2C=NC=N2)C3=C(C=C(C=C3)Cl)Cl	1-[[2-(2,4-dichlorophenyl)-4-propyl-1,3-dioxolan-2-yl]methyl]-1,2,4-triazole	60207-90-1	rat	1.1364
44	CN1C=C(C(=O)C(=C1)C2=CC(=CC=C2)C(F)(F)F)C3=CC=CC=C3	1-methyl-3-phenyl-5-[3-(trifluoromethyl)phenyl]pyridin-4-one	59756-60-4	rat	1.1197
45	CNC(=O)OC1=CC=CC2=CC=CC=C21	naphthalen-1-yl N-methylcarbamate	63-25-2	rat	1.11059
46	C1CC1NC2=NC(=NC(=N2)N)N	2-N-cyclopropyl-1,3,5-triazine-2,4,6-triamine	66215-27-8	rat	1.04459
47	C1=CC(=CC=C1C(C2=CC=C(C=C2)Cl)C(Cl)(Cl)Cl)Cl	1-chloro-4-[2,2,2-trichloro-1-(4-chlorophenyl)ethyl]benzene	50-29-3	rat	1.04444
48	CCC(=O)NC1=CC(=C(C=C1)Cl)Cl	N-(3,4-dichlorophenyl)propanamide	709-98-8	rat	1.03761
49	CC(=O)NC1=C2C(=CC(=C1)S(=O)(=O)[O-])C=C(C(=C2O)N=NC3=CC=CC=C3)S(=O)(=O)[O-].[Na+].[Na+]	disodium;5-acetamido-4-hydroxy-3-phenyldiazenylnaphthalene-2,7-disulfonate	3734-67-6	rat	1.00516
50	CC1=CC(=CC(=C1N(C)C)C)OC(=O)NC	[4-(dimethylamino)-3,5-dimethylphenyl] N-methylcarbamate	315-18-4	mouse	0.985251
51	C[C@@H]1C/C=C/C=C/C=C/C=C/[C@@H](C[C@H]2[C@@H]([C@H](C[C@](O2)(C[C@H](C[C@@H]3[C@H](O3)/C=C/C(=O)O1)O)O)O)C(=O)O)O[C@H]4[C@H]([C@H]([C@@H]([C@H](O4)C)O)N)O	(1R,3S,5R,7R,8E,12R,14E,16E,18E,20E,22R,24S,25R,26S)-22-[(2R,3S,4S,5S,6R)-4-amino-3,5-dihydroxy-6-methyloxan-2-yl]oxy-1,3,26-trihydroxy-12-methyl-10-oxo-6,11,28-trioxatricyclo[22.3.1.05,7]octacosa-8,14,16,18,20-pentaene-25-carboxylic acid	7681-93-8	rat	0.966018
52	CC1=CC(=NC(=N1)NS(=O)(=O)C2=CC=C(C=C2)N)C	4-amino-N-(4,6-dimethylpyrimidin-2-yl)benzenesulfonamide	57-68-1	rat	0.926108
53	CCCN(CCC)C1=C(C=C(C=C1[N+](=O)[O-])C(F)(F)F)[N+](=O)[O-]	2,6-dinitro-N,N-dipropyl-4-(trifluoromethyl)aniline	1582-09-8	rat	0.923399
54	CN(C)C(=O)C(C1=CC=CC=C1)C2=CC=CC=C2	N,N-dimethyl-2,2-diphenylacetamide	957-51-7	rat	0.901894
55	C=CCOC(CN1C=CN=C1)C2=C(C=C(C=C2)Cl)Cl	1-[2-(2,4-dichlorophenyl)-2-prop-2-enoxyethyl]imidazole	35554-44-0	rat	0.870989
56	CCOC(=O)CC(C(=O)OCC)SP(=S)(OC)OC	diethyl 2-dimethoxyphosphinothioylsulfanylbutanedioate	121-75-5	rat	0.82007
57	CCC(C)(CC)C1=NOC(=C1)NC(=O)C2=C(C=CC=C2OC)OC	2,6-dimethoxy-N-[3-(3-methylpentan-3-yl)-1,2-oxazol-5-yl]benzamide	82558-50-7	rat	0.816705
58	C1=C(OC(=C1)[N+](=O)[O-])/C=N/NC(=O)N	[(E)-(5-nitrofuran-2-yl)methylideneamino]urea	59-87-0	rat	0.778502
59	C1=CC=C(C=C1)NC2=CC=CC=C2	N-phenylaniline	122-39-4	rat	0.737141
60	CCC1=CC=CC(=C1N(COCC)C(=O)CCl)C	2-chloro-N-(ethoxymethyl)-N-(2-ethyl-6-methylphenyl)acetamide	34256-82-1	rat	0.732072
61	CC(C(=O)O)(Cl)Cl	2,2-dichloropropanoic acid	75-99-0	rat	0.705458
62	CN1C(=NC(=O)N(C1=O)C2CCCCC2)N(C)C	3-cyclohexyl-6-(dimethylamino)-1-methyl-1,3,5-triazine-2,4-dione	51235-04-2	rat	0.703051
63	C1=CC(=C(C=C1N)N)O.Cl.Cl	2,4-diaminophenol;dihydrochloride	137-09-7	rat	0.696042
64	CC1=CC(=C(C=C1N)N)N=NC2=CC=C(C=C2)S(=O)(=O)[O-].[Na+]	sodium;4-[(2,4-diamino-5-methylphenyl)diazenyl]benzenesulfonate	6300-61-4	mouse	0.68008
65	CC1=C(C(=CC=C1)C)N(C(C)C(=O)OC)C(=O)COC	methyl 2-(N-(2-methoxyacetyl)-2,6-dimethylanilino)propanoate	57837-19-1	rat	0.6503
66	C1=CC(=CC2=NC3=C(C=CC(=C3)N)C=C21)N.Cl	acridine-3,6-diamine;hydrochloride	952-23-8	rat	0.648609
67	C1(=C(C(=NC(=C1Cl)Cl)C(=O)O)Cl)N	4-amino-3,5,6-trichloropyridine-2-carboxylic acid	6607	rat	0.604694
68	CC1(C(=O)N(C(=O)O1)C2=CC(=CC(=C2)Cl)Cl)C=C	3-(3,5-dichlorophenyl)-5-ethenyl-5-methyl-1,3-oxazolidine-2,4-dione	50471-44-8	rat	0.593821
69	COP(=O)(OC)OC(=CCl)C1=CC(=C(C=C1Cl)Cl)Cl	[(Z)-2-chloro-1-(2,4,5-trichlorophenyl)ethenyl] dimethyl phosphate	961-11-5	rat	0.563434
70	CCN(CC)C(=S)SSC(=S)N(CC)CC	diethylcarbamothioylsulfanyl N,N-diethylcarbamodithioate	97-77-8	mouse	0.537673
71	CC1=C(C=C(C=C1[N+](=O)[O-])[N+](=O)[O-])[N+](=O)[O-]	2-methyl-1,3,5-trinitrobenzene	118-96-7	mouse	0.511215
72	C(C(=O)O)Cl	2-chloroacetic acid	79-11-8	rat	0.498311
73	C1=CC=C(C=C1)CCN=C(N)N=C(N)N	1-(diaminomethylidene)-2-(2-phenylethyl)guanidine	114-86-3	rat	0.449066
74	C1=CC=C(C=C1)NNC2=CC=CC=C2	1,2-diphenylhydrazine	122-66-7	mouse	0.426582
75	C1=CC=C2C(=C1)C=CC=C2NCCN.Cl.Cl	N'-naphthalen-1-ylethane-1,2-diamine;dihydrochloride	1465-25-4	rat	0.372539
76	CC1=CC(=C(C=C1C)N)C	2,4,5-trimethylaniline	137-17-7	rat	0.331732
77	C1=CC(=C(C=C1C(F)(F)F)Cl)OC2=CC(=C(C=C2)[N+](=O)[O-])C(=O)[O-].[Na+]	sodium;5-[2-chloro-4-(trifluoromethyl)phenoxy]-2-nitrobenzoate	62476-59-9	rat	0.30304
78	COC(=O)C(CC1=CC=CC=C1)NC(=O)C(CC(=O)O)N	(3S)-3-amino-4-[[(2S)-1-methoxy-1-oxo-3-phenylpropan-2-yl]amino]-4-oxobutanoic acid	22389-47-0	rat	0.301532
79	CCC1C(C=C(C=CC(=O)C(CC(C(C(C(CC(=O)O1)O)C)OC2C(C(C(C(O2)C)OC3CC(C(C(O3)C)O)(C)O)N(C)C)O)CC=O)C)C)COC4C(C(C(C(O4)C)O)OC)OC	2-[(4R,5S,6S,7R,9R,11E,13E,15R,16R)-6-[(2R,3R,4R,5S,6R)-5-[(2S,4R,5S,6S)-4,5-dihydroxy-4,6-dimethyloxan-2-yl]oxy-4-(dimethylamino)-3-hydroxy-6-methyloxan-2-yl]oxy-16-ethyl-4-hydroxy-15-[[(2R,3R,4R,5R,6R)-5-hydroxy-3,4-dimethoxy-6-methyloxan-2-yl]oxymethyl]-5,9,13-trimethyl-2,10-dioxo-1-oxacyclohexadeca-11,13-dien-7-yl]acetaldehyde	1401-69-0	rat	0.263039
80	C1=CC=C(C=C1)N=NC2=C(C=CC3=C2C=CC(=C3)S(=O)(=O)[O-])O.[Na+]	sodium;6-hydroxy-5-phenyldiazenylnaphthalene-2-sulfonate	1934-20-9	rat	0.261091
81	C1=CC(=C(C=C1N)[N+](=O)[O-])N	2-nitrobenzene-1,4-diamine	5307-14-2	rat	0.245626
82	C1=COC(=C1)C=O	furan-2-carbaldehyde	98-01-1	rat	0.204527
83	C(C(Cl)(Cl)Cl)Cl	1,1,1,2-tetrachloroethane	79-34-5	rat	0.191472
84	CCNC(=S)NCC	1,3-diethylthiourea	105-55-5	mouse	0.18693
85	CC1=C(C=C(C=C1)N)Cl	3-chloro-4-methylaniline	95-74-9	mouse	0.134061
86	COC1=CC(=NC(=N1)NC(=O)NS(=O)(=O)CC2=CC=CC=C2C(=O)OC)OC	methyl 2-[(4,6-dimethoxypyrimidin-2-yl)carbamoylsulfamoylmethyl]benzoate	83055-99-6	rat	0.123302
87	COC(=O)NS(=O)(=O)C1=CC=C(C=C1)N	methyl N-(4-aminophenyl)sulfonylcarbamate	3337-71-1	rat	0.106965
88	C1=CC=C2C(=C1)C(=CC=C2S(=O)(=O)[O-])N=NC3=C(C=CC4=CC(=CC(=C43)S(=O)(=O)[O-])S(=O)(=O)[O-])O.[Na+].[Na+].[Na+]	trisodium;7-hydroxy-8-[(4-sulfonatonaphthalen-1-yl)diazenyl]naphthalene-1,3-disulfonate	2611-82-7	mouse	0.0957584
89	CCOC(=O)C1C(O1)(C)C2=CC=CC=C2	ethyl 3-methyl-3-phenyloxirane-2-carboxylate	77-83-8	rat	0.071377
90	CC1=C(C(=O)N(C(=O)N1)C(C)(C)C)Cl	3-tert-butyl-5-chloro-6-methyl-1H-pyrimidine-2,4-dione	5902-51-2	mouse	0.0628376
91	C1=CC(=C(C=C1[N+](=O)[O-])OCCO)NCCO	2-[2-(2-hydroxyethoxy)-4-nitroanilino]ethanol	59820-43-8	rat	0.0244462
92	C1=CC=C2C(=C1)C=CC=C2[N+](=O)[O-]	1-nitronaphthalene	86-57-7	rat	0.0210138
93	CC1(C(C1C(=O)OCC2=CC(=CC=C2)OC3=CC=CC=C3)C=C(Cl)Cl)C	(3-phenoxyphenyl)methyl 3-(2,2-dichloroethenyl)-2,2-dimethylcyclopropane-1-carboxylat	52645-53-1	mouse	0.0184897
94	CCN(CC1=CC(=CC=C1)S(=O)(=O)[O-])C2=CC=C(C=C2)C(=C3C=CC(=[N+](C)C)C=C3)C4=CC=C(C=C4)N(CC)CC5=CC(=CC=C5)S(=O)(=O)[O-].[Na+]	sodium;3-[[4-[(4-dimethylazaniumylidenecyclohexa-2,5-dien-1-ylidene)-[4-[ethyl-[(3-sulfonatophenyl)methyl]amino]phenyl]methyl]-N-ethylanilino]methyl]benzenesulfonate	1694-09-3	rat	-0.0048708
95	C(CCl)P(=O)(O)O	2-chloroethylphosphonic acid	16672-87-0	rat	-0.0162234
96	CC(C)(OC(C)(C)Cl)Cl	2-chloro-2-(2-chloropropan-2-yloxy)propane	39638-32-9	mouse	-0.0634659
97	C1=CC=C2C(=C1)C(=CC=C2S(=O)(=O)[O-])NN=C3C=C(C(=O)C(=NNC4=CC=C(C5=CC=CC=C54)S(=O)(=O)[O-])C3=O)CO.[Na+].[Na+]	disodium;4-[2-[3-(hydroxymethyl)-4,6-dioxo-5-[(4-sulfonatonaphthalen-1-yl)hydrazinylidene]cyclohex-2-en-1-ylidene]hydrazinyl]naphthalene-1-sulfonate	4553-89-3	rat	-0.0825102
98	C(F)(F)(Cl)Cl	dichloro(difluoro)methane	75-71-8	rat	-0.093629
99	C[N+]1(CCCCC1)C.[Cl-]	1,1-dimethylpiperidin-1-ium;chloride	24307-26-4	rat	-0.118273
100	CC1=C(C=CC(=C1)N)N.OS(=O)(=O)O	2-methylbenzene-1,4-diamine;sulfuric acid	6369-59-1	rat	-0.177782
101	COC(=O)C1=C(C(=C(C(=C1Cl)Cl)C(=O)OC)Cl)Cl	dimethyl 2,3,5,6-tetrachlorobenzene-1,4-dicarboxylate	1861-32-1	rat	-0.177884
102	C1=CC=C(C=C1)C2=CC=CC=C2	1,1'-biphenyl	92-52-4	rat	-0.209799
103	C1=CC=C(C=C1)CO	phenylmethanol	100-51-6	mouse	-0.267003
104	CC(C)C1(C(=O)NC(=N1)C2=NC3=CC=CC=C3C=C2C(=O)O)C	2-(4-methyl-5-oxo-4-propan-2-yl-1H-imidazol-2-yl)quinoline-3-carboxylic acid	81335-37-7	mouse	-0.284874
105	CCCCOC(=O)C1=CC=CC=C1C(=O)OCCCC	dibutyl benzene-1,2-dicarboxylate	84-74-2	rat	-0.333513
106	C/C=C/C1=CC=C(C=C1)OC	1-methoxy-4-[(E)-prop-1-enyl]benzene	104-46-1	rat	-0.365652
107	COC(=O)C1=CC=CC=C1O	methyl 2-hydroxybenzoate	119-36-8	rat	-0.374002
108	CCOC(=O)C=C	ethyl prop-2-enoate	140-88-5	rat	-0.393887
109	C=O	formaldehyde	50-00-0	rat	-0.436259
110	CC(=C)C(=O)O	2-methylprop-2-enoic acid	79-41-4	rat	-0.459449
111	C1=CC=C(C=C1)O	phenol	108-95-2	rat	-0.562877
112	CC1CCC(C(C1)O)C(C)C	5-methyl-2-propan-2-ylcyclohexan-1-ol	89-78-1	rat	-0.579096
113	COC1=CC=C(C=C1)N.Cl	4-methoxyaniline;hydrochloride	20265-97-8	rat	-0.585273
114	CC(=O)NC1=CC=C(C=C1)O	N-(4-hydroxyphenyl)acetamide	103-90-2	mouse	-0.598657
115	CCCOC(=O)C1=CC(=C(C(=C1)O)O)O	propyl 3,4,5-trihydroxybenzoate	121-79-9	rat	-0.609727
116	CC1=C(C(=C(C2=C1OC(CC2)(C)CCCC(C)CCCC(C)CCCC(C)C)C)OC(=O)C)C	[(2R)-2,5,7,8-tetramethyl-2-[(4R,8R)-4,8,12-trimethyltridecyl]-3,4-dihydrochromen-6-yl] acetate	52225-20-4	rat	-0.626325
117	COC1=C(C=C(C=C1)[N+](=O)[O-])N=NC2=C(C(=CC3=CC=CC=C32)C(=O)NC4=CC(=CC=C4)[N+](=O)[O-])O	3-hydroxy-4-[(2-methoxy-5-nitrophenyl)diazenyl]-N-(3-nitrophenyl)naphthalene-2-carboxamide	6471-49-4	rat	-0.63428
118	C1C=CCS1(=O)=O	2,5-dihydrothiophene 1,1-dioxide	77-79-2	mouse	-0.721283
119	CCOC1=C(C=C(C=C1)NC(=O)C)N	N-(3-amino-4-ethoxyphenyl)acetamide	17026-81-2	rat	-0.785335
120	C(=S)(N)NNC(=S)N	(carbamothioylamino)thiourea	142-46-1	rat	-0.799507
121	C1=CC(=C(C=C1[N+](=O)[O-])N)C(=O)O	2-amino-4-nitrobenzoic acid	619-17-0	rat	-0.813289
122	C1=CC(=C(C=C1C2=C(C(=O)C3=C(C=C(C=C3O2)O)O)O)O)O	2-(3,4-dihydroxyphenyl)-3,5,7-trihydroxychromen-4-one	117-39-5	rat	-0.827985
123	CC(=O)NC1=CC=C(C=C1)C(=O)CCl	N-[4-(2-chloroacetyl)phenyl]acetamide	140-49-8	rat	-0.873018
124	C1(=C(C(=C(C(=C1Br)Br)Br)Br)Br)OC2=C(C(=C(C(=C2Br)Br)Br)Br)Br	1,2,3,4,5-pentabromo-6-(2,3,4,5,6-pentabromophenoxy)benzene	1163-19·5	mouse	-0.909107
125	C(#N)N.[Ca+2]	calcium;cyanamide	156-62-7	mouse	-0.912792
126	CC1=CC(=C(C=C1S(=O)(=O)[O-])OC)N=NC2=C(C=CC3=C2C=CC(=C3)S(=O)(=O)[O-])O.[Na+].[Na+]	disodium;6-hydroxy-5-[(2-methoxy-5-methyl-4-sulfonatophenyl)diazenyl]naphthalene-2-sulfonate	25956-17-6	rat	-0.917137
127	C([C@H]([C@@H]1C(=C(C(=O)O1)O)O)O)O	(2R)-2-[(1R)-1,2-dihydroxyethyl]-3,4-dihydroxy-2H-furan-5-one	89-65-6	rat	-0.945593
128	CCOC(=O)COC(=O)C1=CC=CC=C1C(=O)OCC	2-O-(2-ethoxy-2-oxoethyl) 1-O-ethyl benzene-1,2-dicarboxylate	84-72-0	rat	-0.950317
129	C(=C/C(=O)O)\C(=O)O	(E)-but-2-enedioic acid	110-17-8	rat	-0.969068
130	COC(=O)C1=CC=C(C=C1)O	methyl 4-hydroxybenzoate	99-76-3	rat	-0.993791
131	C1=CC=C(C(=C1)C(=O)N)C(=O)N	benzene-1,2-dicarboxamide	88-96-0	mouse	-1.11974
132	CC1=NN(C(=O)C1)C2=CC=CC=C2	5-methyl-2-phenyl-4H-pyrazol-3-one	89-25-8	mouse	-1.17304
133	C1N2CN3CN1CN(C2)C3	1,3,5,7-tetrazatricyclo[3.3.1.13,7]decane	100-97-0	mouse	-1.22592
134	C([C@@H]([C@@H]1C(=C(C(=O)O1)O)O)O)O	(2R)-2-[(1S)-1,2-dihydroxyethyl]-3,4-dihydroxy-2H-furan-5-one	50-81-7(b)	rat	-1.23858
135	C1=CC=C2C(=C1)C(=O)NS2(=O)=O	1,1-dioxo-1,2-benzothiazol-3-one	81-07-2	rat	-1.29362
136	CCOC(=O)C1=CC=CC=C1C(=O)OCC	diethyl benzene-1,2-dicarboxylate	84-66-2	rat	-1.30003
137	C1=CC=C(C(=C1)C(=O)O)N	2-aminobenzoic acid	118-92-3	rat	-1.30229
138	C1CCC(CC1)NS(=O)(=O)[O-].[Na+]	sodium;N-cyclohexylsulfamate	139-05-9	rat	-1.30304
139	CC(Cl)Cl	1,1-dichloroethane	75-34-3	mouse	-1.46469
140	C(C(CO)O)O	propane-1,2,3-triol	56-81-5	rat	-1.87347
141	COP(=S)(OC)SCN1C(=O)C2=CC=CC=C2N=N1	3-(dimethoxyphosphinothioylsulfanylmethyl)-1,2,3-benzotriazin-4-one	86-50-0	rat	2.94525
142	CCOP(=S)(OCC)OC1=CC2=C(C=C1)C(=C(C(=O)O2)Cl)C	3-chloro-7-diethoxyphosphinothioyloxy-4-methylchromen-2-one	56-72-4	rat	2.65657
143	CC(C)C(C(=O)OC(C#N)C1=CC(=CC=C1)OC2=CC=CC=C2)NC3=C(C=C(C=C3)C(F)(F)F)Cl	[cyano-(3-phenoxyphenyl)methyl] 2-[2-chloro-4-(trifluoromethyl)anilino]-3-methylbutanoate	69409-94-5	rat	2.30358
144	COP(=O)(OC)OC=C(Cl)Cl	2,2-dichloroethenyl dimethyl phosphate	62-73-7	rat	1.98263
145	C1(C(C(C(C(C1Cl)Cl)Cl)Cl)Cl)C	1,2,3,4,5,6-hexachlorocyclohexane	58-89-9	rat	1.73305
146	CCNC1=NC(=NC(=N1)Cl)NCC	6-chloro-2-N,4-N-diethyl-1,3,5-triazine-2,4-diamine	122-34-9	rat	1.60571
147	CC(CC1=CC=CC=C1)N.CC(CC1=CC=CC=C1)N.OS(=O)(=O)O	1-phenylpropan-2-amine;sulfuric acid	60-13-9	rat	1.4321
148	CN(C)C(=S)SSC(=S)N(C)C	dimethylcarbamothioylsulfanyl N,N-dimethylcarbamodithioate	137-26-8	rat	1.20499
149	CC(C)(C)C1=NN=C(N(C1=O)N)SC	4-amino-6-tert-butyl-3-methylsulfanyl-1,2,4-triazin-5-one	21087-64-9	rat	1.15499
150	CC(C)(C)C(=O)C(N1C=NC=N1)OC2=CC=C(C=C2)Cl	1-(4-chlorophenoxy)-3,3-dimethyl-1-(1,2,4-triazol-1-yl)butan-2-one	43121-43-3	rat	1.07008
151	COC(=O)NC(=S)NC1=CC=CC=C1NC(=S)NC(=O)OC	methyl N-[[2-(methoxycarbonylcarbamothioylamino)phenyl]carbamothioyl]carbamate	23564-05-8	rat	1.02943
152	CC1=C(C=CC(=C1)Cl)OCC(=O)O	2-(4-chloro-2-methylphenoxy)acetic acid	94-74-6	rat	0.950213
153	CC1=C(SCCO1)C(=O)NC2=CC=CC=C2	6-methyl-N-phenyl-2,3-dihydro-1,4-oxathiine-5-carboxamide	5234-68-4	rat	0.894556
154	CC(O)=O.CCCCCCCCCCCCNC(N)=N	1-dodecylguanidine acetate	197143	rat	0.788684
155	CC1=C(C=C(C=C1)[N+](=O)[O-])[N+](=O)[O-]	1-methyl-2,4-dinitrobenzene	121-14-2	mouse	0.72895
156	CC(C)OC1=CC=CC=C1OC(=O)NC	(2-propan-2-yloxyphenyl) N-methylcarbamate	114-26-1	rat	0.621737
157	CN1C(=CC(=[N+]1C)C2=CC=CC=C2)C3=CC=CC=C3.COS(=O)(=O)[O-]	1,2-dimethyl-3,5-diphenylpyrazol-1-ium;methyl sulfate	43222-48-6	rat	0.299917
158	CC1CC(OC(O1)C)OC(=O)C	(2,6-dimethyl-1,3-dioxan-4-yl) acetate	828-00-2	rat	0.144188
159	C(Cl)(Cl)Br	bromo(dichloro)methane	75-27-4	rat	0.100424
160	CO[P+](=O)OC	dimethoxy(oxo)phosphanium	868-85-9	rat	0.0376257
161	C1=CC2=C(C(=C1)O)N=CC=C2	quinolin-8-ol	148-24-3	rat	0.00654084
162	CC(C)(C)C1=CC(=C(C=C1)O)Cl	4-tert-butyl-2-chlorophenol	98-28-2	rat	-0.0680339
163	C[C@H](CCC(=O)O)[C@H]1CC[C@@H]2[C@@]1(CC[C@H]3[C@H]2CC[C@H]4[C@@]3(CC[C@H](C4)O)C)C	(4R)-4-[(3R,5R,8R,9S,10S,13R,14S,17R)-3-hydroxy-10,13-dimethyl-2,3,4,5,6,7,8,9,11,12,14,15,16,17-tetradecahydro-1H-cyclopenta[a]phenanthren-17-yl]pentanoic acid	434-13-9	rat	-0.123044
164	COC1=CC(=C(C=C1)N)OC.Cl	2,4-dimethoxyaniline;hydrochloride	54150-69-5	rat	-0.25565
165	C[N+](C)(C)CCCl.[Cl-]	2-chloroethyl(trimethyl)azanium;chloride	999-81-5	rat	-0.350701
166	C1=CC2=C(C=C1S(=O)(=O)[O-])C(=C(N2)C3=NC4=C(C3=O)C=C(C=C4)S(=O)(=O)[O-])O.[Na+].[Na+]	disodium;2-(3-hydroxy-5-sulfonato-1H-indol-2-yl)-3-oxoindole-5-sulfonate	860-22-0	mouse	-0.415648
167	CC1=CC[C@@H](CC1)C(=C)C	(4R)-1-methyl-4-prop-1-en-2-ylcyclohexene	5989-27-5	mouse	-0.564602
168	C(CO)O	ethane-1,2-diol	107-21-1	rat	-0.604988
169	CCN(CC1=CC(=CC=C1)S(=O)(=O)[O-])C2=CC=C(C=C2)C(=C3C=CC(=[N+](CC)CC4=CC(=CC=C4)S(=O)(=O)[O-])C=C3)C5=C(C=C(C=C5)O)S(=O)(=O)[O-].[Na+].[Na+]	disodium;2-[[4-[ethyl-[(3-sulfonatophenyl)methyl]amino]phenyl]-[4-[ethyl-[(3-sulfonatophenyl)methyl]azaniumylidene]cyclohexa-2,5-dien-1-ylidene]methyl]-5-hydroxybenzenesulfonate	2353-45-9	mouse	-0.651909
170	C1=CN=C(C=N1)C(=O)N	pyrazine-2-carboxamide	98-96-4	rat	-0.806713
171	C1=CC=C2C(=C1)C(=O)OC2=O	2-benzofuran-1,3-dione	85-44-9	rat	-0.903105
172	CCCOC(=O)C1=CC=C(C=C1)O	propyl 4-hydroxybenzoate	94-13-3	rat	-0.920288
173	C1=CC=C2C(=C1)OC3=CC=CC=C3O2	dibenzo-p-dioxin	262-12-4	mouse	-0.972254
174	CCCCCCCCCCCCCCCCCC(=O)OC[C@H]([C@@H]1[C@@H]([C@H](CO1)O)O)O	[(2R)-2-[(2R,3R,4S)-3,4-dihydroxyoxolan-2-yl]-2-hydroxyethyl] octadecanoate	1338-41-6	rat	-1.22334
175	CCCCCCCCCCCC(=O)OCC([C@@H]1[C@@H]([C@H](CO1)O)O)O	[2-[(2R,3R,4S)-3,4-dihydroxyoxolan-2-yl]-2-hydroxyethyl] dodecanoate	1338-39-2	rat	-1.29805
176	COC1=C(C=CC(=C1)C2=CC(=C(C=C2)N=C=O)OC)N=C=O	1-isocyanato-4-(4-isocyanato-3-methoxyphenyl)-2-methoxybenzene	91-93-0	mouse	-1.40622

## Sheet: IM1
	Training Set
Compound No.	nHM	Eta_epsi_3	nCb-	nArCOOH	nOHp	C-007	B01[N-O]	B06[C-N]	B06[C-Cl]	B01[S-P]	nArCOOR	nRSR	pLOEL (experimental)
1	6	0.455102	0	0	0	0	0	0	1	0	0	0	3.88184
2	4	0.427273	0	0	0	0	0	0	0	1	0	1	3.43846
3	2	0.438182	2	0	0	0	0	1	0	1	0	0	3.29861
4	8	0.444	0	0	0	0	0	0	0	0	0	0	3.17637
5	2	0.433333	2	0	0	0	1	0	0	1	0	0	3.0224
6	3	0.426316	0	0	0	0	0	1	0	1	0	0	2.96245
7	0	0.441935	0	0	0	0	0	0	0	0	0	0	2.88686
8	12	0.451724	0	0	0	0	0	0	0	0	0	0	2.8023
9	6	0.461702	0	0	0	0	0	0	0	0	0	0	2.73571
10	0	0.455556	0	0	0	0	0	0	0	0	0	0	2.502
11	4	0.428302	0	0	0	0	0	0	0	1	0	0	2.40081
12	4	0.439535	3	0	0	0	0	1	0	0	0	0	2.34571
13	5	0.426829	0	0	0	0	0	0	1	0	0	0	2.27964
14	3	0.433333	1	0	0	0	0	0	0	1	0	0	2.19291
15	4	0.433333	0	0	0	1	0	1	0	1	0	0	2.17951
16	2	0.433333	0	0	0	0	0	0	0	1	0	0	2.0869
17	1	0.437143	6	0	0	0	1	1	1	0	0	0	2.08125
18	1	0.440541	5	0	0	0	0	1	1	0	0	0	2.00331
19	2	0.433333	2	0	0	0	1	0	0	1	0	0	1.92026
20	2	0.433333	3	0	0	0	0	1	1	0	0	0	1.86294
21	2	0.4375	4	0	0	0	0	1	1	0	0	0	1.83916
22	2	0.433333	2	0	0	0	0	1	0	0	0	0	1.71233
23	1	0.440541	3	0	0	0	0	0	1	0	0	0	1.67362
24	1	0.427273	0	0	0	0	1	1	0	0	0	1	1.64207
25	2	0.433333	3	0	0	0	0	1	1	0	0	0	1.58941
26	1	0.437705	5	0	0	0	0	1	1	0	0	0	1.58925
27	2	0.4375	4	0	0	0	0	0	1	0	0	0	1.57625
28	4	0.428	0	0	0	0	0	0	1	0	0	0	1.52962
29	3	0.433333	4	0	0	0	0	0	1	0	0	0	1.49106
30	5	0.438462	0	0	0	0	0	0	1	0	0	0	1.46373
31	5	0.433333	6	0	0	0	0	0	0	0	0	0	1.4254
32	3	0.433333	4	0	0	0	0	0	1	0	0	0	1.40736
33	2	0.428571	0	0	0	0	0	0	1	0	0	0	1.38681
34	2	0.433333	0	0	0	0	0	0	0	0	0	0	1.32284
35	1	0.442373	4	0	0	0	0	1	0	0	0	1	1.30013
36	0	0.433333	3	0	0	0	1	0	0	0	0	0	1.27924
37	1	0.433333	3	0	0	1	0	0	1	0	0	0	1.25495
38	1	0.425	0	0	0	0	1	1	0	0	0	1	1.21016
39	1	0.433333	0	0	0	0	0	1	0	0	0	1	1.20666
40	3	0.438182	2	0	0	1	0	0	0	1	0	0	1.20051
41	2	0.436986	0	0	0	0	0	1	0	0	1	0	1.19026
42	2	0.437313	2	0	0	0	0	1	0	0	0	0	1.15571
43	2	0.441935	3	0	0	0	0	1	1	0	0	0	1.1364
44	0	0.441176	3	0	0	0	0	1	0	0	0	0	1.1197
45	0	0.439535	3	0	0	0	0	1	0	0	0	0	1.11059
46	0	0.441176	0	0	0	0	0	1	0	0	0	0	1.04459
47	5	0.438182	4	0	0	0	0	0	1	0	0	0	1.04444
48	2	0.433333	3	0	0	0	0	0	1	0	0	0	1.03761
49	2	0.439326	8	0	0	0	0	1	0	0	0	0	1.00516
50	0	0.433333	4	0	0	0	0	1	0	0	0	0	0.985251
51	0	0.439259	0	0	0	0	0	1	0	0	0	0	0.966018
52	1	0.438182	2	0	0	0	0	1	0	0	0	0	0.926108
53	0	0.433333	4	0	0	0	1	1	0	0	0	0	0.923399
54	0	0.438462	2	0	0	0	0	1	0	0	0	0	0.901894
55	2	0.438182	3	0	0	0	0	1	1	0	0	0	0.870989
56	3	0.428814	0	0	0	0	0	0	0	1	0	0	0.82007
57	0	0.437143	3	0	0	0	1	1	0	0	0	0	0.816705
58	0	0.433333	0	0	0	0	1	1	0	0	0	0	0.778502
59	0	0.440541	2	0	0	0	0	0	0	0	0	0	0.737141
60	1	0.433333	3	0	0	1	0	0	1	0	0	0	0.732072
61	2	0.421739	0	0	0	0	0	0	0	0	0	0	0.705458
62	0	0.438462	0	0	0	0	0	1	0	0	0	0	0.703051
63	0	0.433333	3	0	0	0	0	0	0	0	0	0	0.696042
64	1	0.437705	6	0	0	0	0	1	0	0	0	0	0.68008
65	0	0.433333	3	0	0	0	0	0	0	0	0	0	0.6503
66	0	0.445455	6	0	0	0	0	1	0	0	0	0	0.648609
67	3	0.433333	0	1	0	0	0	0	0	0	0	0	0.604694
68	2	0.438462	3	0	0	0	0	0	1	0	0	0	0.593821
69	5	0.433333	4	0	0	0	0	0	1	0	0	0	0.563434
70	4	0.428	0	0	0	0	0	1	0	0	0	0	0.537673
71	0	0.433333	4	0	0	0	1	0	0	0	0	0	0.511215
72	1	0.417647	0	0	0	0	0	0	0	0	0	0	0.498311
73	0	0.433333	1	0	0	0	0	1	0	0	0	0	0.449066
74	0	0.44	2	0	0	0	0	0	0	0	0	0	0.426582
75	0	0.44	3	0	0	0	0	1	0	0	0	0	0.372539
76	0	0.433333	4	0	0	0	0	0	0	0	0	0	0.331732
77	1	0.437143	6	1	0	0	1	1	1	0	0	0	0.30304
78	0	0.433333	1	0	0	0	0	1	0	0	0	0	0.301532
79	0	0.437634	0	0	0	0	0	1	0	0	0	0	0.263039
80	1	0.441538	6	0	0	0	0	1	0	0	0	0	0.261091
81	0	0.433333	3	0	0	0	1	0	0	0	0	0	0.245626
82	0	0.433333	0	0	0	0	0	0	0	0	0	0	0.204527
83	4	0.42	0	0	0	0	0	0	0	0	0	0	0.191472
84	1	0.423077	0	0	0	0	0	0	0	0	0	0	0.18693
85	1	0.433333	3	0	0	0	0	0	0	0	0	0	0.134061
86	1	0.436585	2	0	0	0	0	1	0	0	1	0	0.123302
87	1	0.433333	2	0	0	0	0	0	0	0	0	0	0.106965
88	3	0.441414	10	0	0	0	0	1	0	0	0	0	0.0957584
89	0	0.439535	1	0	0	0	0	0	0	0	0	0	0.071377
90	1	0.433333	0	0	0	0	0	0	0	0	0	0	0.0628376
91	0	0.433333	3	0	2	0	1	1	0	0	0	0	0.0244462
92	0	0.440541	3	0	0	0	1	0	0	0	0	0	0.0210138
93	2	0.440541	3	0	0	0	0	0	0	0	0	0	0.0184897
94	2	0.442857	8	0	0	0	0	1	0	0	0	0	-0.0048708
95	2	0.421739	0	0	0	0	0	0	0	0	0	0	-0.0162234
96	2	0.424138	0	0	0	0	0	0	0	0	0	0	-0.0634659
97	2	0.442373	8	0	1	0	0	1	0	0	0	0	-0.0825102
98	2	0.417647	0	0	0	0	0	0	0	0	0	0	-0.093629
99	0	0.433333	0	0	0	0	0	0	0	0	0	0	-0.118273
100	0	0.433333	3	0	0	0	0	0	0	0	0	0	-0.177782
101	4	0.433333	6	0	0	0	0	0	1	0	2	0	-0.177884
102	0	0.441176	2	0	0	0	0	0	0	0	0	0	-0.209799
103	0	0.433333	1	0	1	0	0	0	0	0	0	0	-0.267003
104	0	0.441538	2	1	0	0	0	1	0	0	0	0	-0.284874
105	0	0.433333	2	0	0	0	0	0	0	0	2	0	-0.333513
106	0	0.433333	2	0	0	0	0	0	0	0	0	0	-0.365652
107	0	0.433333	2	0	0	0	0	0	0	0	1	0	-0.374002
108	0	0.421739	0	0	0	0	0	0	0	0	0	0	-0.393887
109	0	0.4	0	0	0	0	0	0	0	0	0	0	-0.436259
110	0	0.42	0	0	0	0	0	0	0	0	0	0	-0.459449
111	0	0.433333	1	0	0	0	0	0	0	0	0	0	-0.562877
112	0	0.433333	0	0	0	0	0	0	0	0	0	0	-0.579096
113	0	0.433333	2	0	0	0	0	1	0	0	0	0	-0.585273
114	0	0.433333	2	0	0	0	0	0	0	0	0	0	-0.598657
115	0	0.433333	4	0	0	0	0	0	0	0	1	0	-0.609727
116	0	0.436	6	0	0	0	0	0	0	0	0	0	-0.626325
117	0	0.441176	10	0	0	0	1	1	0	0	0	0	-0.63428
118	1	0.433333	0	0	0	0	0	0	0	0	0	0	-0.721283
119	0	0.433333	3	0	0	0	0	1	0	0	0	0	-0.785335
120	2	0.423077	0	0	0	0	0	0	0	0	0	0	-0.799507
121	0	0.433333	3	1	0	0	1	0	0	0	0	0	-0.813289
122	0	0.441935	7	0	0	0	0	0	0	0	0	0	-0.827985
123	1	0.433333	2	0	0	0	0	1	1	0	0	0	-0.873018
124	10	0.437313	12	0	0	0	0	0	0	0	0	0	-0.909107
125	0	0.409091	0	0	0	0	0	0	0	0	0	0	-0.912792
126	2	0.439535	9	0	0	0	0	1	0	0	0	0	-0.917137
127	0	0.433333	0	0	1	0	0	0	0	0	0	0	-0.945593
128	0	0.433333	2	0	0	0	0	0	0	0	2	0	-0.950317
129	0	0.423077	0	0	0	0	0	0	0	0	0	0	-0.969068
130	0	0.433333	2	0	0	0	0	0	0	0	1	0	-0.993791
131	0	0.433333	2	0	0	0	0	0	0	0	0	0	-1.11974
132	0	0.440541	1	0	0	0	0	0	0	0	0	0	-1.17304
133	0	0.453846	0	0	0	6	0	0	0	0	0	0	-1.22592
134	0	0.433333	0	0	1	0	0	0	0	0	0	0	-1.23858
135	1	0.441176	2	0	0	0	0	0	0	0	0	0	-1.29362
136	0	0.433333	2	0	0	0	0	0	0	0	2	0	-1.30003
137	0	0.433333	2	1	0	0	0	0	0	0	0	0	-1.30229
138	1	0.433333	0	0	0	0	0	0	0	0	0	0	-1.30304
139	2	0.414286	0	0	0	0	0	0	0	0	0	0	-1.46469
140	0	0.42	0	0	2	0	0	0	0	0	0	0	-1.87347
	Test Set
Compound No.	nHM	Eta_epsi_3	nCb-	nArCOOH	nOHp	C-007	B01[N-O]	B06[C-N]	B06[C-Cl]	B01[S-P]	nArCOOR	nRSR	pLOEL (experimental)
141	3	0.438182	2	0	0	1	0	1	0	1	0	0	2.94525
142	3	0.4375	3	0	0	0	0	0	1	1	0	0	2.65657
143	1	0.438614	6	0	0	0	0	1	1	0	0	0	2.30358
144	3	0.425714	0	0	0	0	0	0	1	0	0	0	1.98263
145	5	0.433333	0	0	0	0	0	0	0	0	0	0	1.73305
146	1	0.433333	0	0	0	0	0	1	1	0	0	0	1.60571
147	0	0.433333	1	0	0	0	0	1	0	0	0	0	1.4321
148	4	0.426316	0	0	0	0	0	1	0	0	0	0	1.20499
149	1	0.433333	0	0	0	0	0	0	0	0	0	1	1.15499
150	1	0.437931	2	0	0	0	0	1	1	0	0	0	1.07008
151	2	0.433333	2	0	0	0	0	1	0	0	0	0	1.02943
152	1	0.433333	3	0	0	0	0	0	1	0	0	0	0.950213
153	1	0.43913	1	0	0	0	0	0	0	0	0	1	0.894556
154	0	0.428	0	0	0	0	0	1	0	0	0	0	0.788684
155	0	0.433333	3	0	0	0	1	0	0	0	0	0	0.72895
156	0	0.433333	2	0	0	0	0	1	0	0	0	0	0.621737
157	0	0.446154	2	0	0	0	0	1	0	0	0	0	0.299917
158	0	0.433333	0	0	0	0	0	0	0	0	0	0	0.144188
159	3	0.414286	0	0	0	0	0	0	0	0	0	0	0.100424
160	1	0.426316	0	0	0	0	0	0	0	0	0	0	0.0376257
161	0	0.441935	3	0	0	0	0	0	0	0	0	0	0.00654084
162	1	0.433333	3	0	0	0	0	0	0	0	0	0	-0.0680339
163	0	0.444	0	0	0	0	0	0	0	0	0	0	-0.123044
164	0	0.433333	3	0	0	0	0	1	0	0	0	0	-0.25565
165	1	0.421739	0	0	0	0	0	0	0	0	0	0	-0.350701
166	2	0.44359	6	0	0	0	0	1	0	0	0	0	-0.415648
167	0	0.433333	0	0	0	0	0	0	0	0	0	0	-0.564602
168	0	0.414286	0	0	2	0	0	0	0	0	0	0	-0.604988
169	3	0.442466	9	0	0	0	0	1	0	0	0	0	-0.651909
170	0	0.433333	0	0	0	0	0	0	0	0	0	0	-0.806713
171	0	0.441935	2	0	0	0	0	0	0	0	2	0	-0.903105
172	0	0.433333	2	0	0	0	0	0	0	0	1	0	-0.920288
173	0	0.447368	4	0	0	0	0	0	0	0	0	0	-0.972254
174	0	0.433333	0	0	0	0	0	0	0	0	0	0	-1.22334
175	0	0.433333	0	0	0	0	0	0	0	0	0	0	-1.29805
176	0	0.4375	6	0	0	0	0	1	0	0	0	0	-1.40622

## Sheet: Dataset 2
Compound No.	Caninical smile	IUPAC	CAS No	Tested Species	pNOEL (experimental)
1	CC(CCO)O	butane-1,3-diol	107-88-0	rat	-1.88286
2	CCCCOC(=O)C1=CC=CC=C1C(=O)OCCCC	dibutyl benzene-1,2-dicarboxylate	84-74-2	rat	0.347728
3	C(CO)O	ethane-1,2-diol	107-21-1	rat	-0.207048
4	CCOC(=O)COC(=O)C1=CC=CC=C1C(=O)OCC	2-O-(2-ethoxy-2-oxoethyl) 1-O-ethyl benzene-1,2-dicarboxylate	84-72-0	rat	0.0496831
5	CCN(CC1=CC(=CC=C1)S(=O)(=O)[O-])C2=CC=C(C=C2)C(=C3C=CC(=[N+](CC)CC4=CC(=CC=C4)S(=O)(=O)[O-])C=C3)C5=CC=CC=C5S(=O)(=O)[O-].[Na+].[Na+]	disodium;2-[[4-[ethyl-[(3-sulfonatophenyl)methyl]amino]phenyl]-[4-[ethyl-[(3-sulfonatophenyl)methyl]azaniumylidene]cyclohexa-2,5-dien-1-ylidene]methyl]benzenesulfonate	3844-45-9	rat	-0.669858
6	C1=CC2=C(C=C1S(=O)(=O)[O-])C(=C(N2)C3=NC4=C(C3=O)C=C(C=C4)S(=O)(=O)[O-])O.[Na+].[Na+]	disodium;2-(3-hydroxy-5-sulfonato-1H-indol-2-yl)-3-oxoindole-5-sulfonate	860-22-0	mouse	-0.114618
7	C=O	formaldehyde	50-00-0	rat	0.301464
8	C1=CC=C(C=C1)O	phenol	108-95-2	rat	-0.21101
9	CC1=CC[C@@H](CC1=O)C(=C)C	(5S)-2-methyl-5-prop-1-en-2-ylcyclohex-2-en-1-one	2244-16-8	mouse	-0.698276
10	CC(C(=O)O)OC1=CC(=C(C=C1Cl)Cl)Cl	2-(2,4,5-trichlorophenoxy)propanoic acid	93-72-1	rat	2.0156
11	C1=CC(=C(C=C1C(F)(F)F)Cl)OC2=CC(=C(C=C2)[N+](=O)[O-])C(=O)[O-].[Na+]	sodium;5-[2-chloro-4-(trifluoromethyl)phenoxy]-2-nitrobenzoate	62476-59-9	rat	1.16037
12	CCC1=C(C(=CC=C1)CC)N(COC)C(=O)CCl	2-chloro-N-(2,6-diethylphenyl)-N-(methoxymethyl)acetamide	15972-60-8	rat	2.0331
13	CCOC(=O)C(C)OC1=CC=C(C=C1)OC2=CN=C3C=C(C=CC3=N2)Cl	ethyl 2-[4-(6-chloroquinoxalin-2-yl)oxyphenoxy]propanoate	76578-14-8	rat	2.61727
14	COC(=O)NS(=O)(=O)C1=CC=C(C=C1)N	methyl N-(4-aminophenyl)sulfonylcarbamate	3337-71-1	rat	0.805935
15	CC(C)OC1=CC=CC=C1OC(=O)NC	(2-propan-2-yloxyphenyl) N-methylcarbamate	114-26-1	rat	1.32071
16	CC(C)(C)C(=O)C(N1C=NC=N1)OC2=CC=C(C=C2)Cl	1-(4-chlorophenoxy)-3,3-dimethyl-1-(1,2,4-triazol-1-yl)butan-2-one	43121-43-3	rat	2.07008
17	C1=CC=C(C=C1)C2=CC=CC=C2	1,1'-biphenyl	92-52-4	rat	0.489171
18	CC(C)(OC(C)(C)Cl)Cl	2-chloro-2-(2-chloropropan-2-yloxy)propane	39638-32-9	mouse	0.676897
19	ClC(Cl)C(Cl)(Cl)SN1C(=O)[C@H]2CC=CC[C@H]2C1=O		2425-06-01	rat	2.09575
20	CNC(=O)OC1=CC=CC2=CC=CC=C21	naphthalen-1-yl N-methylcarbamate	63-25-2	rat	1.32144
21	C1C2C(C(C1Cl)Cl)C3(C(=C(C2(C3(Cl)Cl)Cl)Cl)Cl)Cl	1,3,4,7,8,9,10,10-octachlorotricyclo[5.2.1.02,6]dec-8-ene	57-74-9	rat	3.87217
22	CC1=NC(=NC(=N1)OC)NC(=O)NS(=O)(=O)C2=CC=CC=C2Cl	1-(2-chlorophenyl)sulfonyl-3-(4-methoxy-6-methyl-1,3,5-triazin-2-yl)urea	64902-72-3	rat	1.85468
23	CCOP(=S)(OCC)OC1=CC2=C(C=C1)C(=C(C(=O)O2)Cl)C	3-chloro-7-diethoxyphosphinothioyloxy-4-methylchromen-2-one	56-72-4	rat	2.9576
24	C1CC1NC2=NC(=NC(=N2)N)N	2-N-cyclopropyl-1,3,5-triazine-2,4,6-triamine	66215-27-8	rat	2.04459
25	COC(=O)C1=C(C(=C(C(=C1Cl)Cl)C(=O)OC)Cl)Cl	dimethyl 2,3,5,6-tetrachlorobenzene-1,4-dicarboxylate	1861-32-1	rat	0.822116
26	CC(C(=O)O)(Cl)Cl	2,2-dichloropropanoic acid	75-99-0	rat	1.22839
27	C(F)(F)(Cl)Cl	dichloro(difluoro)methane	75-71-8	rat	0.906371
28	C(Cl)Cl	dichloromethane	75-09-2	rat	1.23009
29	COP(=O)(OC)OC=C(Cl)Cl	2,2-dichloroethenyl dimethyl phosphate	62-73-7	rat	2.98263
30	C1[C@@H]2[C@H]3[C@@H]([C@H]1[C@H]4[C@@H]2O4)[C@]5(C(=C([C@@]3(C5(Cl)Cl)Cl)Cl)Cl)Cl	(1R,2S,3S,6R,7R,8S,9S,11R)-3,4,5,6,13,13-hexachloro-10-oxapentacyclo[6.3.1.13,6.02,7.09,11]tridec-4-ene	60-57-1	rat	4.88184
31	CN1C(=CC(=[N+]1C)C2=CC=CC=C2)C3=CC=CC=C3.COS(=O)(=O)[O-]	1,2-dimethyl-3,5-diphenylpyrazol-1-ium;methyl sulfate	43222-48-6	rat	0.998887
32	C1=CC(=C(C(=C1)F)C(=O)NC(=O)NC2=CC=C(C=C2)Cl)F	N-[(4-chlorophenyl)carbamoyl]-2,6-difluorobenzamide	35367-38-5	rat	2.19131
33	CC1=C(S(=O)(=O)CCS1(=O)=O)C	5,6-dimethyl-2,3-dihydro-1,4-dithiine 1,1,4,4-tetraoxide	55290-64-7	rat	2.02181
34	CNC(=O)CSP(=S)(OC)OC	2-dimethoxyphosphinothioylsulfanyl-N-methylacetamide	60-51-5	rat	3.66142
35	CC1=C(C=C(C=C1)[N+](=O)[O-])[N+](=O)[O-]	1-methyl-2,4-dinitrobenzene	121-14-2	mouse	1.65837
36	CN(C)C(=O)C(C1=CC=CC=C1)C2=CC=CC=C2	N,N-dimethyl-2,2-diphenylacetamide	957-51-7	rat	1.37902
37	C1=CC=C(C=C1)NC2=CC=CC=C2	N-phenylaniline	122-39-4	rat	1.73714
38	C1C[N+]2=CC=CC=C2C3=CC=CC=[N+]31.[Br-].[Br-]	7,10-diazoniatricyclo[8.4.0.02,7]tetradeca-1(14),2,4,6,10,12-hexaene;dibromide	85-00-7	rat	2.98668
39	CCOP(=S)(OCC)SCCSCC	diethoxy-(2-ethylsulfanylethylsulfanyl)-sulfanylidene-lambda5-phosphane	298-04-4	rat	3.73949
40	CN(C)C(=O)NC1=CC(=C(C=C1)Cl)Cl	3-(3,4-dichlorophenyl)-1,1-dimethylurea	330-54-1	rat	2.36756
41	CC(O)=O.CCCCCCCCCCCCNC(N)=N	1-dodecylguanidine acetate	2439-10-03	rat	1.42747
42	C(CCl)P(=O)(O)O	2-chloroethylphosphonic acid	16672-87-0	rat	0.983777
43	CCOC(=O)C1C(O1)(C)C2=CC=CC=C2	ethyl 3-methyl-3-phenyloxirane-2-carboxylate	77-83-8	rat	0.770347
44	COC(=O)NC1=NC2=C(N1)C=C(C=C2)SC3=CC=CC=C3	methyl N-(6-phenylsulfanyl-1H-benzimidazol-2-yl)carbamate	43210-67-9	rat	1.77725
45	CN1C=C(C(=O)C(=C1)C2=CC(=CC=C2)C(F)(F)F)C3=CC=CC=C3	1-methyl-3-phenyl-5-[3-(trifluoromethyl)phenyl]pyridin-4-one	59756-60-4	rat	1.61455
46	CC(C)C(C(=O)OC(C#N)C1=CC(=CC=C1)OC2=CC=CC=C2)NC3=C(C=C(C=C3)C(F)(F)F)Cl	[cyano-(3-phenoxyphenyl)methyl] 2-[2-chloro-4-(trifluoromethyl)anilino]-3-methylbutanoate	69409-94-5	rat	2.70152
47	CCOP(=S)(CC)SC1=CC=CC=C1	ethoxy-ethyl-phenylsulfanyl-sulfanylidene-lambda5-phosphane	944-22-9	rat	2.6926
48	C1(C(C(C(C(C1Cl)Cl)Cl)Cl)Cl)C	1,2,3,4,5,6-hexachlorocyclohexane	58-89-9	rat	2.03408
49	C1N(CN(CN1[N+](=O)[O-])[N+](=O)[O-])[N+](=O)[O-]	1,3,5-trinitro-1,3,5-triazinane	121-82-4	rat	2.86953
50	C1N2CN3CN1CN(C2)C3	1,3,5,7-tetrazatricyclo[3.3.1.13,7]decane	100-97-0	mouse	-0.925072
51	CN1C(=NC(=O)N(C1=O)C2CCCCC2)N(C)C	3-cyclohexyl-6-(dimethylamino)-1-methyl-1,3,5-triazine-2,4-dione	51235-04-2	rat	1.40202
52	C=CCOC(CN1C=CN=C1)C2=C(C=C(C=C2)Cl)Cl	1-[2-(2,4-dichlorophenyl)-2-prop-2-enoxyethyl]imidazole	35554-44-0	rat	1.47305
53	CC(C)C1(C(=O)NC(=N1)C2=NC3=CC=CC=C3C=C2C(=O)O)C	2-(4-methyl-5-oxo-4-propan-2-yl-1H-imidazol-2-yl)quinoline-3-carboxylic acid	81335-37-7	mouse	0.317186
54	CCC(C)(CC)C1=NOC(=C1)NC(=O)C2=C(C=CC=C2OC)OC	2,6-dimethoxy-N-[3-(3-methylpentan-3-yl)-1,2-oxazol-5-yl]benzamide	82558-50-7	rat	1.82274
55	COC1=CC(=NC(=N1)NC(=O)NS(=O)(=O)CC2=CC=CC=C2C(=O)OC)OC	methyl 2-[(4,6-dimethoxypyrimidin-2-yl)carbamoylsulfamoylmethyl]benzoate	83055-99-6	rat	1.13614
56	CCOC(=O)CC(C(=O)OCC)SP(=S)(OC)OC	diethyl 2-dimethoxyphosphinothioylsulfanylbutanedioate	121-75-5	rat	1.82007
57	C[N+]1(CCCCC1)C.[Cl-]	1,1-dimethylpiperidin-1-ium;chloride	24307-26-4	rat	0.358848
58	CCCCSP(=O)(SCCCC)SCCCC	1-bis(butylsulfanyl)phosphorylsulfanylbutane	78-48-8	rat	3.09978
59	CC1=C(C(=CC=C1)C)N(C(C)C(=O)OC)C(=O)COC	methyl 2-(N-(2-methoxyacetyl)-2,6-dimethylanilino)propanoate	57837-19-1	rat	1.34927
60	COC1=NN(C(=O)S1)CSP(=S)(OC)OC	3-(dimethoxyphosphinothioylsulfanylmethyl)-5-methoxy-1,3,4-thiadiazol-2-one	950-37-8	rat	3.17951
61	C/C(=N\OC(=O)NC)/SC	methyl (1E)-N-(methylcarbamoyloxy)ethanimidothioate	16752-77-5	rat	1.51119
62	COP(=S)(OC)OC1=CC=C(C=C1)[N+](=O)[O-]	dimethoxy-(4-nitrophenoxy)-sulfanylidene-lambda5-phosphane	298-00-0	rat	4.0224
63	CC1=C(C=CC(=C1)Cl)OCC(=O)O	2-(4-chloro-2-methylphenoxy)acetic acid	94-74-6	rat	1.42733
64	CC(C)(C)C1=NN=C(N(C1=O)N)SC	4-amino-6-tert-butyl-3-methylsulfanyl-1,2,4-triazin-5-one	21087-64-9	rat	1.63211
65	C12(C3(C4(C5(C3(C(C1(C5(C2(C4(Cl)Cl)Cl)Cl)Cl)(Cl)Cl)Cl)Cl)Cl)Cl)Cl	1,2,3,4,5,5,6,7,8,9,10,10-dodecachloropentacyclo[5.3.0.02,6.03,9.04,8]decane	2385-85-5	mouse	3.50635
66	COP(=O)(OC)OC(C(Cl)(Cl)Br)Br	(1,2-dibromo-2,2-dichloroethyl) dimethyl phosphate	300-76-5	rat	3.27964
67	CC(C)OC1=C(C=C(C(=C1)N2C(=O)OC(=N2)C(C)(C)C)Cl)Cl	5-tert-butyl-3-(2,4-dichloro-5-propan-2-yloxyphenyl)-1,3,4-oxadiazol-2-one	19666-30-9	rat	2.83916
68	CNC(=O)O/N=C(/C(=O)N(C)C)\SC	methyl (1Z)-2-(dimethylamino)-N-(methylcarbamoyloxy)-2-oxoethanimidothioate	23135-22-0	rat	1.9431
69	CCOC1=C(C=CC(=C1)OC2=C(C=C(C=C2)C(F)(F)F)Cl)[N+](=O)[O-]	2-chloro-1-(3-ethoxy-4-nitrophenoxy)-4-(trifluoromethyl)benzene	42874-03-3	mouse	3.08125
70	C1(=C(C(=C(C(=C1Cl)Cl)Cl)Cl)Cl)O	2,3,4,5,6-pentachlorophenol	87-86-5	mouse	1.94828
71	COP(=S)(OC)SCN1C(=O)C2=CC=CC=C2C1=O	2-(dimethoxyphosphinothioylsulfanylmethyl)isoindole-1,3-dione	732-11-6	rat	2.20051
72	C1(=C(C(=NC(=C1Cl)Cl)C(=O)O)Cl)N	4-amino-3,5,6-trichloropyridine-2-carboxylic acid	1918-02-01	rat	1.08182
73	CCN(CC)C1=NC(=CC(=N1)OP(=S)(OC)OC)C	4-dimethoxyphosphinothioyloxy-N,N-diethyl-6-methylpyrimidin-2-amine	29232-93-7	rat	2.78587
74	C1=CC=C2C(=C1)C(=CC=C2S(=O)(=O)[O-])N=NC3=C(C=CC4=CC(=CC(=C43)S(=O)(=O)[O-])S(=O)(=O)[O-])O.[Na+].[Na+].[Na+]	trisodium;7-hydroxy-8-[(4-sulfonatonaphthalen-1-yl)diazenyl]naphthalene-1,3-disulfonate	2611-82-7	mouse	0.796744
75	CCC(=O)NC1=CC(=C(C=C1)Cl)Cl	N-(3,4-dichlorophenyl)propanamide	709-98-8	rat	1.63967
76	CCCC1COC(O1)(CN2C=NC=N2)C3=C(C=C(C=C3)Cl)Cl	1-[[2-(2,4-dichlorophenyl)-4-propyl-1,3-dioxolan-2-yl]methyl]-1,2,4-triazole	60207-90-1	rat	1.83537
77	CCOP(=S)(OCC)OC1=NC2=CC=CC=C2N=C1	diethoxy-quinoxalin-2-yloxy-sulfanylidene-lambda5-phosphane	13593-03-8	mouse	3.99758
78	C[C@H]1[C@@H](SC(=O)N1C(=O)NC2CCCCC2)C3=CC=C(C=C3)Cl	(4S,5S)-5-(4-chlorophenyl)-N-cyclohexyl-4-methyl-2-oxo-1,3-thiazolidine-3-carboxamide	78587-05-0	rat	1.18595
79	CCNC1=NC(=NC(=N1)Cl)NCC	6-chloro-2-N,4-N-diethyl-1,3,5-triazine-2,4-diamine	122-34-9	rat	2.58868
80	CC1=C(C(=O)N(C(=O)N1)C(C)(C)C)Cl	3-tert-butyl-5-chloro-6-methyl-1H-pyrimidine-2,4-dione	5902-51-2	mouse	1.46078
81	CCNC1=NC(=NC(=N1)SC)NC(C)(C)C	2-N-tert-butyl-4-N-ethyl-6-methylsulfanyl-1,3,5-triazine-2,4-diamine	886-50-0	rat	3.38276
82	CCN(CC)C(=O)SCC1=CC=C(C=C1)Cl	S-[(4-chlorophenyl)methyl] N,N-diethylcarbamothioate	28249-77-6	rat	2.4113
83	COC(=O)NC(=S)NC1=CC=CC=C1NC(=S)NC(=O)OC	methyl N-[[2-(methoxycarbonylcarbamothioylamino)phenyl]carbamothioyl]carbamate	23564-05-8	rat	1.63149
84	CN(C)C(=S)SSC(=S)N(C)C	dimethylcarbamothioylsulfanyl N,N-dimethylcarbamodithioate	137-26-8	rat	1.68211
85	CC1(C(C1C(=O)OC(C#N)C2=CC(=CC=C2)OC3=CC=CC=C3)C(C(Br)(Br)Br)Br)C	[cyano-(3-phenoxyphenyl)methyl] 2,2-dimethyl-3-(1,2,2,2-tetrabromoethyl)cyclopropane-1-carboxylate	66841-25-6	rat	2.94777
86	CC(C)N(C(C)C)C(=O)SCC(=C(Cl)Cl)Cl	S-(2,3,3-trichloroprop-2-enyl) N,N-di(propan-2-yl)carbamothioate	2303-17-5	mouse	2.00674
87	C1=C(C(=CC(=C1Cl)Cl)Cl)OCC(=O)O	2-(2,4,5-trichlorophenoxy)acetic acid	93-76-5	rat	1.93024
88	CCCN(CCC)C1=C(C=C(C=C1[N+](=O)[O-])C(F)(F)F)[N+](=O)[O-]	2,6-dinitro-N,N-dipropyl-4-(trifluoromethyl)aniline	1582-09-8	rat	1.52546
89	CC1=NC(=NC(=N1)OC)NC(=O)NS(=O)(=O)C2=CC=CC=C2OCCCl	1-[2-(2-chloroethoxy)phenyl]sulfonyl-3-(4-methoxy-6-methyl-1,3,5-triazin-2-yl)urea	82097-50-5	mouse	2.60409
90	CCC1C(C=C(C=CC(=O)C(CC(C(C(C(CC(=O)O1)O)C)OC2C(C(C(C(O2)C)OC3CC(C(C(O3)C)O)(C)O)N(C)C)O)CC=O)C)C)COC4C(C(C(C(O4)C)O)OC)OC	2-[(4R,5S,6S,7R,9R,11E,13E,15R,16R)-6-[(2R,3R,4R,5S,6R)-5-[(2S,4R,5S,6S)-4,5-dihydroxy-4,6-dimethyloxan-2-yl]oxy-4-(dimethylamino)-3-hydroxy-6-methyloxan-2-yl]oxy-16-ethyl-4-hydroxy-15-[[(2R,3R,4R,5R,6R)-5-hydroxy-3,4-dimethoxy-6-methyloxan-2-yl]oxymethyl]-5,9,13-trimethyl-2,10-dioxo-1-oxacyclohexadeca-11,13-dien-7-yl]acetaldehyde	1401-69-0	rat	0.263039
91	CC1(C(=O)N(C(=O)O1)C2=CC(=CC(=C2)Cl)Cl)C=C	3-(3,5-dichlorophenyl)-5-ethenyl-5-methyl-1,3-oxazolidine-2,4-dione	50471-44-8	rat	1.07094

## Sheet: IM2
	Training Set
Compound No.	nHM	C-019	O-058	B03[C-P]	B04[C-N]	nArOR	pNOEL (experimental)
2	0	0	2	0	0	0	0.347728
3	0	0	0	0	0	0	-0.207048
4	0	0	3	0	0	0	0.0496831
6	2	0	5	0	1	0	-0.114618
7	0	0	1	0	0	0	0.301464
8	0	0	0	0	0	0	-0.21101
10	3	0	1	0	0	1	2.0156
11	1	0	1	0	1	1	1.16037
12	1	0	1	0	1	0	2.0331
14	1	0	3	0	1	0	0.805935
15	0	0	1	0	1	1	1.32071
16	1	0	1	0	1	1	2.07008
18	2	0	0	0	0	0	0.676897
19	5	0	2	0	1	0	2.09575
20	0	0	1	0	1	0	1.32144
21	8	2	0	0	0	0	3.87217
22	2	0	3	0	1	1	1.85468
23	3	1	1	1	0	0	2.9576
25	4	0	2	0	0	0	0.822116
26	2	0	1	0	0	0	1.22839
27	2	0	0	0	0	0	0.906371
29	3	0	1	1	0	0	2.98263
30	6	2	0	0	0	0	4.88184
31	0	0	0	0	1	0	0.998887
33	2	2	4	0	0	0	2.02181
34	3	0	1	1	0	0	3.66142
35	0	0	0	0	1	0	1.65837
37	0	0	0	0	1	0	1.73714
38	0	0	0	0	1	0	2.98668
39	4	0	0	1	0	0	3.73949
41	0	0	0	0	1	0	1.42747
42	2	0	1	0	0	0	0.983777
43	0	0	1	0	0	0	0.770347
45	0	0	1	0	1	0	1.61455
46	1	0	1	0	1	1	2.70152
47	3	0	0	1	0	0	2.6926
48	5	0	0	0	0	0	2.03408
49	0	0	0	0	1	0	2.86953
50	0	0	0	0	0	0	-0.925072
52	2	0	0	0	1	0	1.47305
53	0	0	2	0	1	0	0.317186
54	0	0	1	0	1	2	1.82274
56	3	0	2	1	0	0	1.82007
57	0	0	0	0	0	0	0.358848
58	4	0	1	1	0	0	3.09978
60	4	0	1	0	1	0	3.17951
61	1	0	1	0	1	0	1.51119
62	2	0	0	1	1	0	4.0224
64	1	0	1	0	1	0	1.63211
65	12	0	0	0	0	0	3.50635
66	5	0	1	1	0	0	3.27964
68	1	0	2	0	1	0	1.9431
69	1	0	0	0	1	2	3.08125
70	5	0	0	0	0	0	1.94828
71	3	0	2	0	1	0	2.20051
72	3	0	1	0	1	0	1.08182
73	2	0	0	1	1	0	2.78587
75	2	0	1	0	1	0	1.63967
76	2	0	0	0	1	0	1.83537
77	2	0	0	1	1	0	3.99758
79	1	0	0	0	1	0	2.58868
80	1	2	2	0	1	0	1.46078
81	1	0	0	0	1	0	3.38276
82	2	0	1	0	1	0	2.4113
83	2	0	2	0	1	0	1.63149
84	4	0	0	0	1	0	1.68211
86	4	1	1	0	1	0	2.00674
87	3	0	1	0	0	1	1.93024
88	0	0	0	0	1	0	1.52546
90	0	0	3	0	1	0	0.263039
91	2	0	2	0	1	0	1.07094
	Test Set
Compound No.	nHM	C-019	O-058	B03[C-P]	B04[C-N]	nArOR	pNOEL (experimental)
1	0	0	0	0	0	0	-1.88286
5	3	0	6	0	1	0	-0.669858
9	0	0	1	0	0	0	-0.698276
13	1	0	1	0	1	2	2.61727
17	0	0	0	0	0	0	0.489171
24	0	0	0	0	1	0	2.04459
28	2	0	0	0	0	0	1.23009
32	1	0	2	0	1	0	2.19131
36	0	0	1	0	1	0	1.37902
40	2	0	1	0	1	0	2.36756
44	1	0	1	0	1	0	1.77725
51	0	0	2	0	1	0	1.40202
55	1	0	4	0	1	2	1.13614
59	0	0	2	0	1	0	1.34927
63	1	0	1	0	0	1	1.42733
67	2	0	1	0	1	1	2.83916
74	3	0	6	0	1	0	0.796744
78	2	0	2	0	1	0	1.18595
85	4	0	1	0	1	1	2.94777
89	2	0	3	0	1	2	2.60409

## Sheet: Dataset 3
Compound No.	Caninical smile	IUPAC	CAS No	Tested Species	pLOEL (experimental)
1	CC(C(=O)C)O	3-hydroxybutan-2-one	513-86-0	rat	-1.16417
2	CC(=O)C	propan-2-one	67-64-1	rat	-0.934869
3	C(CCCCCN)CCCCC(=O)O	11-aminoundecanoic acid	2432-99-7	rat	-0.951321
4	C1=CC=C(C=C1)C=O	benzaldehyde	100-52-7	mouse	-0.752313
5	CCCCC(CC)COC(=O)C1=CC=CC=C1C(=O)OCC(CC)CCCC	bis(2-ethylhexyl) benzene-1,2-dicarboxylate	117-81-7	mouse	0.336482
6	CCCCO	butan-1-ol	71-36-3	rat	-0.828917
7	CCCCOC(=O)C1=CC=CC=C1C(=O)OCC2=CC=CC=C2	2-O-benzyl 1-O-butyl benzene-1,2-dicarboxylate	85-68-7	mouse	-0.892337
8	CC(C)(C)C1=C(C=CC(=C1)OC)O	2-tert-butyl-4-methoxyphenol	25013-16-5	rat	-1.0096
9	C1=CC=C(C=C1)/C=C/C=O	(E)-3-phenylprop-2-enal	104-55-2	rat	-0.577837
10	CC(C)C1=CC=CC=C1	cumene	98-82-8	rat	-0.584701
11	CCCCC(CC)COC(=O)CCCCC(=O)OCC(CC)CCCC	bis(2-ethylhexyl) hexanedioate	103-23-1	rat	-0.464471
12	CCOCCOCCO	2-(2-ethoxyethoxy)ethanol	111-90-0	rat	-1.27019
13	CC1=CC(=C(C=C1)O)C	2,4-dimethylphenol	105-67-9	mouse	-0.31094
14	CCCCCCCCCCCCOC(=O)C1=CC(=C(C(=C1)O)O)O	dodecyl 3,4,5-trihydroxybenzoate	1166-52-5	rat	0.830576
15	CCOC(=O)C	ethyl acetate	141-78-6	rat	-1.61123
16	CCOCC	ethoxyethane	60-29-7	rat	-1.43098
17	CCCCC(CC)CO	2-ethylhexan-1-ol	104-76-7	mouse	-0.283129
18	CCC1=CC=CC=C1	ethylbenzene	100-41-4	rat	-0.584617
19	C1=CC=C(C=C1)C(=O)OCC(COC(=O)C2=CC=CC=C2)OC(=O)C3=CC=CC=C3	2,3-dibenzoyloxypropyl benzoate	614-33-5	rat	-0.803248
20	CCC/C=C/C=O	(E)-hex-2-enal	505-57-7	rat	-0.417999
21	CCCCCCC1=C(C=C(C=C1)O)O	4-hexylbenzene-1,3-diol	136-77-6	mouse	0.191563
22	C1=CC(=CC=C1O)O	benzene-1,4-diol	123-31-9	rat	0.342896
23	CC(=O)CCC1=CC=C(C=C1)O	4-(4-hydroxyphenyl)butan-2-one	5471-51-2	rat	-0.164785
24	[H]N[C@@H]([C@@H](C)CC)C(=O)N[C@@H](CCCNC(N)=N)C(=O)N[C@@H]([C@@H](C)CC)C(=O)N[C@@H](CO)C(=O)N[C@@H](CCCCNC(=O)[C@@H]1N=CC[C@H]1C)C(=O)N[C@@H](CC(N)=O)C(=O)N[C@@H](CCC(O)=O)C(O)=O	IRISONE	8013-90-9	rat	0.986001
25	C(C1C(C(C(C(O1)OCC(C(C(C(CO)O)O)O)O)O)O)O)O	(2S,3R,4R,5R)-6-[(2S,3R,4S,5S,6R)-3,4,5-trihydroxy-6-(hydroxymethyl)oxan-2-yl]oxyhexane-1,2,3,4,5-pentol	534-73-6	rat	-1.41096
26	CC(C)CC(=O)O	3-methylbutanoic acid	503-74-2	rat	-1.62494
27	[CH-](C=O)C=O.[Na+]	sodium;propanedial	24382-04-5	rat	0.0796033
28	CO	methanol	67-56-1	rat	-1.89211
29	CC(C)[C@H](CC1=CC=CC=C1)[C@@H](CC2=CC=CC=C2)O.CC(C)[C@H](CC1=CC=CC=C1)[C@@H](CC2=CC=CC=C2)OCC=C	(2R,3S)-3-benzyl-4-methyl-1-phenylpentan-2-ol;[(2R,3S)-3-benzyl-4-methyl-2-prop-2-enoxypentyl]benzene	38502-29-3	rat	0.887195
30	CC1=CC(=CC=C1)O	3-methylphenol	108-39-4	rat	-0.142065
31	CC(C1=CC=CC=C1)OC(=O)C	1-phenylethyl acetate	93-92-5	rat	0.0393348
32	C1=CC=C(C=C1)OCCO	2-phenoxyethanol	122-99-6	rat	-0.461615
33	CC(CC1=CC=CC=C1)O	1-phenylpropan-2-ol	698-87-3	rat	0.532149
34	C.[H]C(=O)C1=CC=CC=C1		1334-78-7	rat	-0.673132
35	C=CC(=O)O	prop-2-enoic acid	79-10-7	rat	-0.522457
36	C=CCO	prop-2-en-1-ol	107-18-6	rat	0.78183
37	CCCCCCC(=O)OCC=C	prop-2-enyl heptanoate	142-19-8	rat	0.035264
38	CC1=CC(=C(C(=C1)C(C)(C)C)O)C(C)(C)C	2,6-ditert-butyl-4-methylphenol	128-37-0	rat	0.343192
39	CC(=O)C(=O)C	butane-2,3-dione	431-03-8	rat	-0.797391
40	CCCCC(/C=C/C=O)O	(E)-4-hydroxyoct-2-enal	55-88-9	rat	0.647811
41	CC1=CC(=O)CC(C1)(C)C	3,5,5-trimethylcyclohex-2-en-1-one	78-59-1	rat	-0.859398
42	CC1=C(C(=O)C=CO1)O	3-hydroxy-2-methylpyran-4-one	118-71-8	mouse	0.509719
43	CCCCCC(=O)C	heptan-2-one	110-43-0	rat	0.0577041
44	COC(=O)C1=CC=CC=C1N	methyl 2-aminobenzoate	134-20-3	rat	-0.519476
45	C#CCO	prop-2-yn-1-ol	107-19-7	rat	0.572639
46	C1=CC=NC=C1	pyridine	110-86-1	rat	0.898231
47	C[C@@H]1[C@H]2C[C@]2(CC1=O)C(C)C	(1S,4R,5R)-4-methyl-1-propan-2-ylbicyclo[3.1.0]hexan-3-one	546-80-5	rat	1.18259
48	CC1=C(C=CC(=C1)Cl)OC(C)C(=O)O	2-(4-chloro-2-methylphenoxy)propanoic acid	93-65-2	rat	1.03072
49	CC1=C(C=CC(=C1)Cl)OCCCC(=O)O	4-(4-chloro-2-methylphenoxy)butanoic acid	94-81-5	rat	0.757187
50	C1=CC(=C2C(=C1N)C(=O)C3=C(C=CC(=C3C2=O)N)N)N	1,4,5,8-tetraaminoanthracene-9,10-dione	2475-45-8	rat	0.318031
51	C1=CC=C(C=C1)NC2=C(C=C(C=C2)NC3=C(C=C(C=C3)[N+](=O)[O-])[N+](=O)[O-])S(=O)(=O)[O-].[Na+]	sodium;2-anilino-5-(2,4-dinitroanilino)benzenesulfonate	6373-74-6	mouse	-0.366097
52	C1=CC=C2C(=C1)C(=CC=C2S(=O)(=O)[O-])N=NC3=C(C4=CC=CC=C4C(=C3)S(=O)(=O)[O-])O.[Na+].[Na+]	disodium;4-hydroxy-3-[(4-sulfonatonaphthalen-1-yl)diazenyl]naphthalene-1-sulfonate	3567-69-9	mouse	-0.725872
53	CC1=CC(=C(C=C1)O)N=NC2=CC=C(C=C2)NC(=O)C	N-[4-[(2-hydroxy-5-methylphenyl)diazenyl]phenyl]acetamide	2832-40-8	rat	-0.268685
54	C1=CC=C(C=C1)N=NC2=C(C=CC3=CC=CC=C32)O	1-phenyldiazenylnaphthalen-2-ol	842-07-9	rat	0.394977
55	CNC1=C(C=C(C=C1)N(CCO)CCO)[N+](=O)[O-]	2-[N-(2-hydroxyethyl)-4-(methylamino)-3-nitroanilino]ethanol	2784-94-3	rat	-0.388812
56	C1=CC(=C(C=C1N(CCO)CCO)[N+](=O)[O-])NCCO	2-[4-[bis(2-hydroxyethyl)amino]-2-nitroanilino]ethanol	33229-34-4	rat	-0.337029
57	C1CC2=CC=CC3=C2C1=CC=C3	1,2-dihydroacenaphthylene	83-32-9	mouse	-0.355927
58	CC(=O)CC(=O)N	3-oxobutanamide	5977-14-0	rat	-0.943087
59	CC(=O)CC(=O)NS(O)(=O)=O	3-oxobutanoylsulfamic acid	99911-45-2	rat	-1.41007
60	CC(C)(/C=N/OC(=O)NC)SC	[(E)-(2-methyl-2-methylsulfanylpropylidene)amino] N-methylcarbamate	116-06-3	rat	2.43434
61	CC(C)(C=NOC(=O)NC)S(=O)(=O)C	[(E)-(2-methyl-2-methylsulfonylpropylidene)amino] N-methylcarbamate	1646-88-4	rat	2.04591
62	CC(C)CC(=O)OCC=C	prop-2-enyl 3-methylbutanoate	2835-39-4	rat	0.0560507
63	CCNC1=NC(=NC(=N1)SC)NC(C)C	4-N-ethyl-6-methylsulfanyl-2-N-propan-2-yl-1,3,5-triazine-2,4-diamine	834-12-8	rat	0.356752
64	C1=CC(=C(C=C1[N+](=O)[O-])N)O	2-amino-4-nitrophenol	99-57-0	rat	-0.511055
65	C1=CC(=C(C=C1[N+](=O)[O-])O)N	2-amino-5-nitrophenol	121-88-0	rat	-0.113115
66	C1=CC(=CC=C1N)O	4-aminophenol	123-30-8	rat	-0.79834
67	C1=CC=C(C(=C1)NC2=NC(=NC(=N2)Cl)Cl)Cl	4,6-dichloro-N-(2-chlorophenyl)-1,3,5-triazin-2-amine	101-05-3	rat	-0.462921
68	C1=CC=C2C(=C1)C(=CC=C2S(=O)(=O)[O-])N=NC3=C(C4=CC=CC=C4C(=C3)S(=O)(=O)[O-])O.[Na+].[Na+]	disodium;4-hydroxy-3-[(4-sulfonatonaphthalen-1-yl)diazenyl]naphthalene-1-sulfonate	3567-69-0	rat	-0.0376307
69	C1=CC=C2C(=C1)C=CO2	1-benzofuran	271-89-6	rat	0.276517
70	C1=CC=C(C=C1)C(C(=O)C2=CC=CC=C2)O	2-hydroxy-1,2-diphenylethanone	119-53-9	rat	0.928928
71	C1=CC=C(C=C1)CC2=C(C=CC(=C2)Cl)O	2-benzyl-4-chlorophenol	120-32-1	rat	-0.0403823
72	C1=CC=C(C=C1)C2=CC=CC=C2N.Cl	2-phenylaniline;hydrochloride	2185-92-4	mouse	-0.0267695
73	CC(CCl)OC(C)CCl	1-chloro-2-(1-chloropropan-2-yloxy)propane	108-60-1	rat	-0.164741
74	CC(C)(C1=CC=C(C=C1)O)C2=CC=C(C=C2)O	4-[2-(4-hydroxyphenyl)propan-2-yl]phenol	80-05-7	rat	0.305446
75	CCCCCl	1-chlorobutane	109-69-3	rat	-0.431423
76	CC1=C(C(CCC1=O)(C)C)/C=C/C(=C/C=C/C(=C/C=C/C=C(/C=C/C=C(/C=C/C2=C(C(=O)CCC2(C)C)C)\C)\C)/C)/C	2,4,4-trimethyl-3-[(1E,3E,5E,7E,9E,11E,13E,15E,17E)-3,7,12,16-tetramethyl-18-(2,6,6-trimethyl-3-oxocyclohexen-1-yl)octadeca-1,3,5,7,9,11,13,15,17-nonaenyl]cyclohex-2-en-1-one	514-78-3	rat	-0.248013
77	C1CCC(=O)NCC1	azepan-2-one	105-60-2	rat	-0.34417
78	CC(C)NCC(COC1=CC=CC2=C1C3=CC=CC=C3N2)O	1-(9H-carbazol-4-yloxy)-3-(propan-2-ylamino)propan-2-ol	57775-29-8	rat	0.991954
79	C1=CC=C2C(=C1)C(=CC=C2S(=O)(=O)[O-])N=NC3=C(C4=CC=CC=C4C(=C3)S(=O)(=O)[O-])O.[Na+].[Na+]	disodium;4-hydroxy-3-[(4-sulfonatonaphthalen-1-yl)diazenyl]naphthalene-1-sulfonate	3567-69-9	rat	-0.286584
80	C1(C(C2(C(=C(C1(C2(Cl)Cl)Cl)Cl)Cl)Cl)C(=O)O)C(=O)O	1,4,5,6,7,7-hexachlorobicyclo[2.2.1]hept-5-ene-2,3-dicarboxylic acid	115-28-6	rat	0.440541
81	C1=CC=C(C=C1)Cl	chlorobenzene	108-90-7	rat	0.0513841
82	C(Cl)(Br)Br	dibromo(chloro)methane	124-48-1	rat	-0.0793133
83	C1=CC=C2C=C(C=CC2=C1)Cl	2-chloronaphthalene	91-58-7	mouse	-0.566977
84	CC1=CC=CC=C1Cl	1-chloro-2-methylbenzene	95-49-8	rat	0.199309
85	CN(C)CCC(C1=CC=C(C=C1)Cl)C2=CC=CC=N2.C(=C\C(=O)O)\C(=O)O	(Z)-but-2-enedioic acid;3-(4-chlorophenyl)-N,N-dimethyl-3-pyridin-2-ylpropan-1-amine	113-92-8	rat	0.660897
86	C1=CC=C2C(=C1)C=CC(=O)O2	chromen-2-one	91-64-5	mouse	-0.312322
87	COC1=C(C=CC(=C1)/C=C/C(=O)CC(=O)/C=C/C2=CC(=C(C=C2)O)OC)O	(1E,6E)-1,7-bis(4-hydroxy-3-methoxyphenyl)hepta-1,6-diene-3,5-dione	458-37-7	mouse	-0.401217
88	C([C@@H]1[C@@H]2[C@@H]([C@H]([C@H](O1)O[C@@H]3[C@H](O[C@@H]([C@@H]([C@H]3O)O)O[C@@H]4[C@H](O[C@@H]([C@@H]([C@H]4O)O)O[C@@H]5[C@H](O[C@@H]([C@@H]([C@H]5O)O)O[C@@H]6[C@H](O[C@@H]([C@@H]([C@H]6O)O)O[C@@H]7[C@H](O[C@@H]([C@@H]([C@H]7O)O)O[C@@H]8[C@H](O[C@H](O2)[C@@H]([C@H]8O)O)CO)CO)CO)CO)CO)CO)O)O)O	(1S,3R,5R,6S,8R,10R,11S,13R,15R,16S,18R,20R,21S,23R,25R,26S,28R,30R,31S,33R,35R,36R,37R,38R,39R,40R,41R,42R,43R,44R,45R,46R,47R,48R,49R)-5,10,15,20,25,30,35-heptakis(hydroxymethyl)-2,4,7,9,12,14,17,19,22,24,27,29,32,34-tetradecaoxaoctacyclo[31.2.2.23,6.28,11.213,16.218,21.223,26.228,31]nonatetracontane-36,37,38,39,40,41,42,43,44,45,46,47,48,49-tetradecol	7585-39-9	rat	-0.149078
89	NC1=CC(=C(C=CC2=CC=C(N)C=C2S(O)(=O)=O)C=C1)S(O)(=O)=O		7336-20-1	rat	-0.803457
90	CCOP(=S)(OCC)OC1=NC(=NC(=C1)C)C(C)C	diethoxy-(6-methyl-2-propan-2-ylpyrimidin-4-yl)oxy-sulfanylidene-lambda5-phosphane	333-41-5	mouse	0.325068
91	C(C(CCl)O)Cl	1,3-dichloropropan-2-ol	96-23-1	rat	1.11056
92	C1=C(C=C(C(=C1Cl)N)Cl)N	2,6-dichlorobenzene-1,4-diamine	609-20-1	rat	-0.0529586
93	C1=CC=C(C(=C1)Cl)Cl	1,2-dichlorobenzene	95-50-1	rat	0.0704073
94	C1=CC(=CC=C1Cl)Cl	1,4-dichlorobenzene	106-46-7	rat	-0.610834
95	C1=CC=C(C(=C1)C(C2=CC=CC=C2Cl)(C(=O)O)O)Cl	2,2-bis(2-chlorophenyl)-2-hydroxyacetic acid	457622	rat	0.127
96	C(CCl)Cl	1,2-dichloroethane	107-06-2	rat	0.224608
97	C=C(Cl)Cl	1,1-dichloroethene	75-35-4	mouse	0.384443
98	C(C(CCl)Cl)O	2,3-dichloropropan-1-ol	616-23-9	rat	0.566488
99	C(C=CCl)Cl	1,3-dichloroprop-1-ene	542-75-6	rat	1.04521
100	CCN(CC)C(=S)[S-].[Na+]	sodium;N,N-diethylcarbamodithioate	148-18-5	rat	0.174089
101	C1CC(=O)OC2=CC=CC=C21	3,4-dihydrochromen-2-one	119-84-6	rat	-0.306361
102	COP(=O)(C)OC	[methoxy(methyl)phosphoryl]oxymethane	756-79-6	rat	-1.20729
103	COP(=O)(N1CCOCC1)OC	4-dimethoxyphosphorylmorpholine	597-25-1	rat	-0.311625
104	CN(C)C1=CC=CC=C1	N,N-dimethylaniline	121-69-7	mouse	0.291111
105	CN(C)CCOC(C1=CC=CC=C1)C2=CC=CC=C2.Cl	2-benzhydryloxy-N,N-dimethylethanamine;hydrochloride	147-24-0	rat	0.915842
106	C1=CC=C(C=C1)C2(C(=O)NC(=O)N2)C3=CC=CC=C3	5,5-diphenylimidazolidine-2,4-dione	57-41-0	rat	0.314829
107	C[C@@H]([C@@H](C1=CC=CC=C1)O)NC.C[C@@H]([C@@H](C1=CC=CC=C1)O)NC.OS(=O)(=O)O	(1R,2S)-2-(methylamino)-1-phenylpropan-1-ol;sulfuric acid	134-72-5	rat	0.519198
108	CCCCCCCCCCCCCCCCCC(=O)O.CC[C@@H]1[C@@]([C@@H]([C@H](C(=O)[C@@H](C[C@@]([C@@H]([C@H]([C@@H]([C@H](C(=O)O1)C)O[C@H]2C[C@@]([C@H]([C@@H](O2)C)O)(C)OC)C)O[C@H]3[C@@H]([C@H](C[C@H](O3)C)N(C)C)O)(C)O)C)C)O)(C)O	(3R,4S,5S,6R,7R,9R,11R,12R,13S,14R)-6-[(2S,3R,4S,6R)-4-(dimethylamino)-3-hydroxy-6-methyloxan-2-yl]oxy-14-ethyl-7,12,13-trihydroxy-4-[(2R,4R,5S,6S)-5-hydroxy-4-methoxy-4,6-dimethyloxan-2-yl]oxy-3,5,7,9,11,13-hexamethyl-oxacyclotetradecane-2,10-dione;octadecanoic acid	643-22-1	rat	0.297524
109	CCOP(=S)(C1=CC=CC=C1)OC2=CC=C(C=C2)[N+](=O)[O-]	ethoxy-(4-nitrophenoxy)-phenyl-sulfanylidene-lambda5-phosphane	2104-64-5	rat	2.41274
110	C1CNC(=S)N1	imidazolidine-2-thione	96-45-7	mouse	0.778917
111	COP(=S)(OC)OC1=CC(=C(C=C1Cl)Cl)Cl	dimethoxy-sulfanylidene-(2,4,5-trichlorophenoxy)-lambda5-phosphane	299-84-3	rat	0.808279
112	CN(C)C(=O)NC1=CC=CC(=C1)C(F)(F)F	1,1-dimethyl-3-[3-(trifluoromethyl)phenyl]urea	2164-17-2	rat	0.490857
113	C1=CC=C2C(=C1)C3=CC=CC4=C3C2=CC=C4	fluoranthene	206-44-0	mouse	-0.09203
114	C1C2=CC=CC=C2C3=CC=CC=C31	9H-fluorene	86-73-7	mouse	-0.177231
115	CP(=O)(CCC(C(=O)O)N)O.N	2-amino-4-[hydroxy(methyl)phosphoryl]butanoic acid;azane	77182-82-2	rat	1.75289
116	C(=C(Cl)Cl)(C(=C(Cl)Cl)Cl)Cl	1,1,2,3,4,4-hexachlorobuta-1,3-diene	87-68-3	rat	2.01827
117	C1(=C(C(C(=C1Cl)Cl)(Cl)Cl)Cl)Cl	1,2,3,4,5,5-hexachlorocyclopenta-1,3-diene	77-47-4	rat	1.15701
118	C1NC2=CC(=C(C=C2S(=O)(=O)N1)S(=O)(=O)N)Cl	6-chloro-1,1-dioxo-3,4-dihydro-2H-1lambda6,2,4-benzothiadiazine-7-sulfonamide	58-93-5	mouse	-0.612123
119	CC(C1OCC(O1)CO)I	[2-(1-iodoethyl)-1,3-dioxolan-4-yl]methanol	5634-39-9	mouse	0.0137975
120	CCCN(CCC)C1=C(C=C(C=C1[N+](=O)[O-])C(C)C)[N+](=O)[O-]	2,6-dinitro-4-propan-2-yl-N,N-dipropylaniline	33820-53-0	rat	0.642345
121	C1CSC2=NC(CN21)C3=CC=CC=C3	(6S)-6-phenyl-2,3,5,6-tetrahydroimidazo[2,1-b][1,3]thiazole	14769-73-4		0.708251
122	CCOC(=O)CC(C(=O)OCC)SP(=O)(OC)OC	diethyl 2-dimethoxyphosphorylsulfanylbutanedioate	1634-78-2	rat	-0.104674
123	C1=CC(=O)OC1=O	furan-2,5-dione	108-31-6	rat	-0.00850811
124	C1=CC=C2C(=C1)NC(=S)S2	3H-1,3-benzothiazole-2-thione	149-30-4	mouse	-0.350613
125	CCCCSP(SCCCC)SCCCC	tris(butylsulfanyl)phosphane	150-50-5	rat	3.07711
126	COC1=C2C(=CC3=C1OC=C3)C=CC(=O)O2	9-methoxyfuro[3,2-g]chromen-7-one	298-81-7	rat	0.635886
127	COC(=O)N	methyl carbamate	598-55-0	rat	-0.425506
128	CNC1=CC=CC=C1C(=O)OC	methyl 2-(methylamino)benzoate	85-91-6	rat	0.439885
129	CC(CC1=CC(=C(C=C1)O)O)(C(=O)O)N.CC(CC1=CC(=C(C=C1)O)O)(C(=O)O)N.O.O.O	(2S)-2-amino-3-(3,4-dihydroxyphenyl)-2-methylpropanoic acid;trihydrate	41372-08-1	rat	-0.527704
130	C=CC(=O)NCO	N-(hydroxymethyl)prop-2-enamide	924-42-5	rat	0.606897
131	CCC1=CC=CC(=C1N(C(C)COC)C(=O)CCl)C	2-chloro-N-(2-ethyl-6-methylphenyl)-N-(1-methoxypropan-2-yl)acetamide	51218-45-2	rat	0.754088
132	CN(C)C(=O)NC1=CC=C(C=C1)Cl	3-(4-chlorophenyl)-1,1-dimethylurea	150-68-5	rat	0.122041
133	CCN1C=C(C(=O)C2=C1N=C(C=C2)C)C(=O)O	1-ethyl-7-methyl-4-oxo-1,8-naphthyridine-3-carboxylic acid	389-08-2	rat	0.0649444
134	C1C(=O)NC(=O)N1/N=C/C2=CC=C(O2)[N+](=O)[O-]	1-[(E)-(5-nitrofuran-2-yl)methylideneamino]imidazolidine-2,4-dione	67-20-9	rat	-0.0210347
135	C1=C(C(=C(C(=C1Br)Br)Br)Br)OC2=CC(=C(C(=C2Br)Br)Br)Br	1,2,3,4-tetrabromo-5-(2,3,4,5-tetrabromophenoxy)benzene	32536-52-0	rat	2.20485
136	C1N(CN(CN(CN1[N+](=O)[O-])[N+](=O)[O-])[N+](=O)[O-])[N+](=O)[O-]	1,3,5,7-tetranitro-1,3,5,7-tetrazocane	2691-41-0	rat	0.295494
137	COC(=O)NC1=NC2=C(N1)C=C(C=C2)S(=O)C3=CC=CC=C3	methyl N-[6-(benzenesulfinyl)-1H-benzimidazol-2-yl]carbamate	53716-50-0	rat	1.61234
138	C[C@@]1([C@H]2[C@@H]([C@H]3[C@@H](C(=O)C(=C([C@]3(C(=O)C2=C(C4=C1C=CC=C4O)O)O)O)C(=O)N)N(C)C)O)O.Cl	(4S,4aR,5S,5aR,6S,12aR)-4-(dimethylamino)-1,5,6,10,11,12a-hexahydroxy-6-methyl-3,12-dioxo-4,4a,5,5a-tetrahydrotetracene-2-carboxamide;hydrochloride	2058-46-0	mouse	-1.23716
139	CC1=CC2=C(C=C1)N=C3C(=N2)SC(=O)S3	6-methyl-[1,3]dithiolo[4,5-b]quinoxalin-2-one	196869	rat	1.72636
140	CC(C)(C)[C@H]([C@@H](CC1=CC=C(C=C1)Cl)N2C=NC=N2)O	(2R,3R)-1-(4-chlorophenyl)-4,4-dimethyl-2-(1,2,4-triazol-1-yl)pentan-3-ol	76738-62-0	rat	0.672216
141	CCC(CC)NC1=C(C=C(C(=C1[N+](=O)[O-])C)C)[N+](=O)[O-]	3,4-dimethyl-2,6-dinitro-N-pentan-3-ylaniline	40487-42-1	rat	0.0513069
142	CC1([C@@H](N2[C@H](S1)[C@@H](C2=O)NC(=O)COC3=CC=CC=C3)C(=O)[O-])C.[K+]	potassium;(2S,5R,6R)-3,3-dimethyl-7-oxo-6-[(2-phenoxyacetyl)amino]-4-thia-1-azabicyclo[3.2.0]heptane-2-carboxylate	132-98-9	rat	-0.33046
143	C1=CC(=C(C=C1Br)Br)OC2=CC(=C(C=C2Br)Br)Br	1,2,4-tribromo-5-(2,4-dibromophenoxy)benzene	32534-81-9	rat	2.23328
144	C(C(Cl)(Cl)Cl)(Cl)Cl	1,1,1,2,2-pentachloroethane	76-01-7	rat	-0.0919871
145	C1(=C(C(=C(C(=C1Cl)Cl)Cl)Cl)Cl)[N+](=O)[O-]	1,2,3,4,5-pentachloro-6-nitrobenzene	82-68-8	mouse	-0.18292
146	C1=CC=C(C=C1)NC2=CC3=CC=CC=C3C=C2	N-phenylnaphthalen-2-amine	135-88-6	rat	-0.41101
147	CCCCC1C(=O)N(N(C1=O)C2=CC=CC=C2)C3=CC=CC=C3	4-butyl-1,2-diphenylpyrazolidine-3,5-dione	50-33-9	rat	0.790158
148	C1=CC(=CC(=C1)N)N	benzene-1,3-diamine	108-45-2	rat	0.778794
149	CCCN(CCC)S(=O)(=O)C1=CC=C(C=C1)C(=O)O	4-(dipropylsulfamoyl)benzoic acid	57-66-9	mouse	0.154424
150	CC(CN1C2=CC=CC=C2SC3=CC=CC=C31)N(C)C.Cl	N,N-dimethyl-1-phenothiazin-10-ylpropan-2-amine;hydrochloride	58-33-3	mouse	1.27793
151	CC(C)(C#C)NC(=O)C1=CC(=CC(=C1)Cl)Cl	3,5-dichloro-N-(2-methylbut-3-yn-2-yl)benzamide	23950-58-5	rat	1.53342
152	CC(C)N(C1=CC=CC=C1)C(=O)CCl	2-chloro-N-phenyl-N-propan-2-ylacetamide	1918-16-7	rat	0.200911
153	CC(C)OC(=O)NC1=CC=CC=C1	propan-2-yl N-phenylcarbamate	122-42-9	rat	0.253435
154	CC(C)C(C1=CC=C(C=C1)Cl)C(=O)OC(C#N)C2=CC(=CC=C2)OC3=CC=CC=C3	[cyano-(3-phenoxyphenyl)methyl] 2-(4-chlorophenyl)-3-methylbutanoate	51630-58-1	rat	1.74812
155	C1=CC2=C3C(=C1)C=CC4=CC=CC(=C43)C=C2	pyrene	129-00-0	mouse	0.209
156	COC1=CC2=C(C=CN=C2C=C1)[C@H]([C@@H]3C[C@@H]4CCN3C[C@@H]4C=C)O.Cl	(R)-[(2S,4S,5R)-5-ethenyl-1-azabicyclo[2.2.2]octan-2-yl]-(6-methoxyquinolin-4-yl)methanol;hydrochloride	130-89-2	rat	0.511161
157	CO[C@H]1[C@@H](C[C@@H]2CN3CCC4=C([C@H]3C[C@@H]2[C@@H]1C(=O)OC)NC5=C4C=CC(=C5)OC)OC(=O)C6=CC(=C(C(=C6)OC)OC)OC	methyl (1R,15S,17R,18R,19S,20S)-6,18-dimethoxy-17-(3,4,5-trimethoxybenzoyl)oxy-1,3,11,12,14,15,16,17,18,19,20,21-dodecahydroyohimban-19-carboxylate	50-55-5	mouse	2.70526
158	C(C(=O)[O-])F.[Na+]	sodium;2-fluoroacetate	62-74-8	rat	2.59134
159	C1CC(=O)OC1=O	oxolane-2,5-dione	108-30-5	mouse	-0.175744
160	CC1=NOC(NS(=O)(=O)C2=CC=C(N)C=C2)=C1C	4-amino-N-(3,4-dimethyl-1,2-oxazol-5-yl)benzenesulfonamide	127-69-5	rat	-0.572936
161	C1=C(C(=CC(=C1Cl)Cl)Cl)Cl	1,2,4,5-tetrachlorobenzene	95-94-3	rat	1.80273
162	C(C(Cl)(Cl)Cl)Cl	1,1,1,2-tetrachloroethane	630-20-6	rat	-0.474075
163	C1=C(C(=C(C(=C1Cl)Cl)Cl)O)Cl	2,3,4,6-tetrachlorophenol	58-90-2	rat	0.365263
164	CC1(C2CC3C(C(=O)C(=C(C3(C(=O)C2=C(C4=C1C=CC=C4O)O)O)O)C(=O)N)N(C)C)O.Cl	(4S,4aS,5aS,6S,12aR)-4-(dimethylamino)-1,6,10,11,12a-pentahydroxy-6-methyl-3,12-dioxo-4,4a,5,5a-tetrahydrotetracene-2-carboxamide;hydrochloride	64-75-5	rat	-0.151488
165	CCOP(=S)(OCC)OP(=S)(OCC)OCC	diethoxyphosphinothioyloxy-diethoxy-sulfanylidene-λ5-phosphane	3689-24-5	rat	2.50834
166	C(O)[P+](CO)(CO)CO.[Cl-]	tetrakis(hydroxymethyl)phosphanium;chloride	124-64-1	rat	1.31845
167	C(O)[P+](CO)(CO)CO.C(O)[P+](CO)(CO)CO.[O-]S(=O)(=O)[O-]	tetrakis(hydroxymethyl)phosphanium;sulfate	55566-30-8	rat	1.19351
168	CC1=C(C=CC=C1N)N.Cl.Cl	2-methylbenzene-1,3-diamine;dihydrochloride	15481-70-6	mouse	0.371032
169	C1=CC=C(C=C1)C2=NC3=C(N=C(N=C3N=C2N)N)N	6-phenylpteridine-2,4,7-triamine	396-01-0	rat	0.558537
170	C(Br)(Br)Br	bromoform	75-25-2	mouse	0.10161
171	C(C(Cl)Cl)Cl	1,1,2-trichloroethane	79-00-5	mouse	0.462398
172	C1=C(C(=CC(=C1Cl)Cl)Cl)O	2,4,5-trichlorophenol	95-95-4	rat	-0.181686
173	C(CCl)OP(=O)(OCCCl)OCCCl	tris(2-chloroethyl) phosphate	115-96-8	rat	0.812153
174	C=CCl	chloroethene	75-01-4	rat	-0.20412

## Sheet: IM3
	Training Set
Compound No.	nO	nCsp	X4v	nRCNO	H-048	MaxdssC	MaxssssC	B01[C-F]	B05[O-S]	SAscore	C-026	nCconjX	pLOEL(experimental)
1	2	0	0	0	0	-0.185185	0	0	0	2.97795	0	0	-1.16417
2	1	0	0	0	0	0.166667	0	0	0	2.19731	0	0	-0.934869
3	2	0	1.48122	0	0	-0.673198	0	0	0	2.56938	0	0	-0.951321
4	1	0	0.531606	0	0	0	0	0	0	3.04828	0	0	-0.752313
6	1	0	0.158114	0	0	0	0	0	0	2.58841	0	0	-0.828917
7	4	0	2.02694	0	0	-0.494712	0	0	0	3.41636	0	0	-0.892337
8	2	0	1.24284	0	0	0	-0.0569213	0	0	3.29717	2	0	-1.0096
10	0	0	0.837939	0	0	0	0	0	0	3.04907	0	0	-0.584701
11	4	0	2.90082	0	0	-0.139881	0	0	0	3.60166	0	0	-0.464471
12	3	0	0.4288	0	0	0	0	0	0	2.93611	0	0	-1.27019
14	5	0	2.55974	0	0	-0.614329	0	0	0	2.92996	3	0	0.830576
15	2	0	0.203263	0	0	-0.210648	0	0	0	2.59673	0	0	-1.61123
16	1	0	0.204124	0	0	0	0	0	0	2.60021	0	0	-1.43098
17	1	0	0.91731	0	0	0	0	0	0	2.98275	0	0	-0.283129
18	0	0	0.713713	0	0	0	0	0	0	2.79907	0	0	-0.584617
19	6	0	2.56221	0	0	-0.564124	0	0	0	3.41342	0	0	-0.803248
20	1	0	0.318447	0	0	0	0	0	0	3.16619	0	0	-0.417999
21	2	0	1.50587	0	0	0	0	0	0	2.99703	2	0	0.191563
22	2	0	0.452632	0	0	0	0	0	0	2.37393	2	0	0.342896
24	13	0	6.74337	0	0	-0.306193	0	0	0	5.63134	0	0	0.986001
25	11	0	2.06034	0	1	0	0	0	0	4.35375	0	0	-1.41096
28	1	0	0	0	0	0	0	0	0	1.99194	0	0	-1.89211
29	1	0	3.05464	0	0	0	0	0	0	3.96402	0	0	0.887195
30	1	0	0.62797	0	0	0	0	0	0	2.96388	1	0	-0.142065
31	2	0	1.04104	0	0	-0.244118	0	0	0	3.49611	0	0	0.0393348
32	2	0	0.680215	0	0	0	0	0	0	2.65645	1	0	-0.461615
33	1	0	0.955205	0	0	0	0	0	0	3.39122	0	0	0.532149
34	1	0	0.531606	0	0	0	0	0	0	3.04828	0	0	-0.673132
35	2	0	0	0	0	-0.981481	0	0	0	2.67609	0	0	-0.522457
36	1	0	0	0	0	0	0	0	0	2.78191	0	0	0.78183
37	2	0	0.920155	0	0	-0.105553	0	0	0	2.80972	0	0	0.035264
38	1	0	1.92224	0	0	0	-0.0177546	0	0	3.51457	1	0	0.343192
39	2	0	0	0	0	-0.37963	0	0	0	2.74143	0	0	-0.797391
40	2	0	0.683106	0	0	0	0	0	0	3.44923	0	0	0.647811
41	1	0	1.66589	0	0	1.22338	0.204282	0	0	3.04591	0	0	-0.859398
42	3	0	0.506127	0	1	0.252315	0	0	0	3.67177	0	0	0.509719
43	1	0	0.623945	0	0	0.318009	0	0	0	2.58132	0	0	0.0577041
45	1	2	0	0	1	0	0	0	0	3.0588	0	0	0.572639
46	0	0	0.312602	0	0	0	0	0	0	2.48627	0	0	0.898231
47	1	0	2.60705	0	0	0.509213	0.454861	0	0	4.56389	0	0	1.18259
48	3	0	1.21256	0	0	-0.986713	0	0	0	3.51704	2	0	1.03072
51	7	0	3.3125	0	0	0	0	0	0	3.32207	7	0	-0.366097
52	7	0	4.69016	0	0	0	0	0	1	3.78905	5	0	-0.725872
54	1	0	1.95111	0	0	0	0	0	0	2.975	3	0	0.394977
55	4	0	1.69061	0	0	0	0	0	0	3.25574	3	0	-0.388812
56	5	0	1.81926	0	0	0	0	0	0	3.29546	3	0	-0.337029
57	0	0	2.18778	0	0	0	0	0	0	3.38019	0	0	-0.355927
59	5	0	0.765923	0	0	-0.480417	0	0	1	3.50566	0	0	-1.41007
60	2	0	0.447938	1	0	-0.552636	-0.103153	0	0	3.92585	0	0	2.43434
61	4	0	0.577037	1	0	-0.74486	-1.15176	0	0	3.8706	0	0	2.04591
63	0	0	1.36322	0	0	0	0	0	0	3.70082	0	0	0.356752
64	3	0	0.655478	0	0	0	0	0	0	2.91511	3	0	-0.511055
66	1	0	0.474322	0	0	0	0	0	0	2.44564	2	0	-0.79834
67	0	0	1.61129	0	0	0	0	0	0	3.45475	2	0	-0.462921
68	7	0	4.69016	0	0	0	0	0	1	3.78905	5	0	-0.0376307
69	1	0	0.906177	0	1	0	0	0	0	2.93465	0	0	0.276517
71	1	0	1.70615	0	0	0	0	0	0	3.11413	2	0	-0.0403823
72	0	0	1.37761	0	0	0	0	0	0	3.06503	1	0	-0.0267695
74	2	0	1.92286	0	0	0	-0.151389	0	0	3.56034	2	0	0.305446
75	0	0	0.400892	0	0	0	0	0	0	3.28039	0	0	-0.431423
76	2	0	5.28296	0	0	1.16387	0.0404181	0	0	3.98361	0	0	-0.248013
77	1	0	0.90353	0	0	0.224537	0	0	0	2.58613	0	0	-0.34417
78	2	0	2.60524	0	0	0	0	0	0	4.09277	1	0	0.991954
79	7	0	4.69016	0	0	0	0	0	1	3.78905	5	0	-0.286584
80	4	0	5.53736	0	0	-0.346543	-2.10576	0	0	5.5295	0	0	0.440541
81	0	0	0.560146	0	0	0	0	0	0	2.21212	1	0	0.0513841
82	0	0	0	0	0	0	0	0	0	4.68536	0	0	-0.0793133
83	0	0	1.34072	0	0	0	0	0	0	2.64672	1	0	-0.566977
84	0	0	0.68672	0	0	0	0	0	0	3.25006	1	0	0.199309
85	0	0	2.27578	0	0	0	0	0	0	3.94653	1	0	0.660897
87	6	0	2.26368	0	0	-0.347242	0	0	0	3.6382	4	0	-0.401217
88	35	0	10.4157	0	7	0	0	0	0	8.20695	0	0	-0.149078
89	6	0	3.44155	0	0	0	0	0	0	3.79996	4	0	-0.803457
90	3	0	3.38413	0	0	0	0	0	0	4.03534	0	0	0.325068
91	1	0	0.371154	0	0	0	0	0	0	4.05641	0	0	1.11056
92	0	0	1.10784	0	0	0	0	0	0	3.14875	4	0	-0.0529586
94	0	0	0.681526	0	0	0	0	0	0	2.55934	2	0	-0.610834
95	3	0	2.42971	0	0	-1.43639	-2.28106	0	0	3.63162	2	0	0.127
98	1	0	0.146385	0	0	0	0	0	0	4.64467	0	0	0.566488
99	0	0	0.303046	0	1	0	0	0	0	4.56402	0	0	1.04521
100	0	0	1.03517	0	0	0.689815	0	0	0	3.24965	0	0	0.174089
101	2	0	1.22034	0	0	-0.121574	0	0	0	3.24858	1	0	-0.306361
102	3	0	0.223607	0	0	0	0	0	0	3.83008	0	0	-1.20729
103	4	0	2.36829	0	0	0	0	0	0	3.80206	0	0	-0.311625
104	0	0	0.726137	0	0	0	0	0	0	2.54871	1	0	0.291111
105	1	0	1.99369	0	0	0	0	0	0	3.36824	0	0	0.915842
106	2	0	2.40468	0	0	-0.351944	-1.13928	0	0	3.55064	0	0	0.314829
107	1	0	1.09676	0	0	0	0	0	0	3.76129	0	0	0.519198
108	13	0	8.41033	0	2	-0.411012	-1.05131	0	0	5.83356	0	0	0.297524
110	0	0	0.618686	0	0	0.787037	0	0	0	3.17762	0	0	0.778917
112	1	0	1.00856	0	0	-0.472848	-4.40391	1	0	3.19193	1	0	0.490857
113	0	0	2.74273	0	0	0	0	0	0	3.49867	0	0	-0.09203
114	0	0	2.07961	0	0	0	0	0	0	3.3509	0	0	-0.177231
116	0	0	0.92633	0	0	-0.0648148	0	0	0	4.72801	0	6	2.01827
117	0	0	2.13167	0	0	0.100309	-1.47492	0	0	4.73029	0	4	1.15701
118	4	0	3.70235	0	2	0	0	0	1	3.68972	4	0	-0.612123
119	3	0	1.18412	0	1	0	0	0	0	4.67211	0	0	0.0137975
120	4	0	2.43626	0	0	0	0	0	0	3.31122	3	0	0.642345
121	0	0	3.0048	0	0	1.24894	0	0	0	4.11828	0	0	0.708251
122	7	0	4.01739	0	0	-0.577029	0	0	0	4.17442	0	0	-0.104674
123	3	0	0.303268	0	0	-0.578704	0	0	0	3.04858	0	0	-0.00850811
124	0	0	2.00991	0	0	0.848333	0	0	0	3.46073	2	0	-0.350613
126	4	0	1.79156	0	1	-0.405828	0	0	0	3.50912	2	0	0.635886
128	2	0	0.989076	0	0	-0.319491	0	0	0	2.89855	1	0	0.439885
129	4	0	1.17862	0	0	-1.11568	-1.3855	0	0	3.63091	2	0	-0.527704
131	2	0	2.44952	0	0	-0.0877623	0	0	0	4.0028	1	0	0.754088
132	1	0	0.894489	0	0	-0.150627	0	0	0	2.91299	2	0	0.122041
133	3	0	1.75327	0	1	-0.21759	0	0	0	3.95636	0	0	0.0649444
134	5	0	1.16073	0	0	-0.460578	0	0	0	3.89832	0	0	-0.0210347
135	1	0	5.47649	0	0	0	0	0	0	4.28071	10	0	2.20485
137	3	0	3.08416	0	0	-0.604499	0	0	0	3.96511	2	0	1.61234
138	9	0	5.59723	0	0	-0.664375	-2.04638	0	0	4.92823	1	0	-1.23716
139	1	0	3.20356	0	0	0.0528038	0	0	0	4.43799	0	0	1.72636
140	1	0	2.3036	0	0	0	-0.233093	0	0	4.1473	1	0	0.672216
141	4	0	2.0925	0	0	0	0	0	0	3.46426	3	0	0.0513069
142	5	0	4.57698	0	1	-0.362467	-0.604984	0	1	4.02303	1	0	-0.33046
144	0	0	0	0	1	0	-1.55247	0	0	4.33366	0	0	-0.0919871
145	2	0	2.02002	0	0	0	0	0	0	3.62679	6	0	-0.18292
146	0	0	1.95523	0	0	0	0	0	0	2.62011	2	0	-0.41101
147	2	0	2.87698	0	0	-0.140275	0	0	0	3.12546	2	0	0.790158
148	0	0	0.55901	0	0	0	0	0	0	2.57798	2	0	0.778794
149	4	0	3.39355	0	0	-1.06674	0	0	0	3.17663	1	0	0.154424
150	0	0	3.50112	0	0	0	0	0	0	3.71213	4	0	1.27793
151	1	2	1.60305	0	1	-0.29875	-0.702503	0	0	3.29205	2	0	1.53342
152	1	0	1.51187	0	0	-0.0621605	0	0	0	3.13734	1	0	0.200911
154	3	1	3.31338	0	0	-0.450691	0	0	0	4.29265	3	0	1.74812
155	0	0	2.66959	0	0	0	0	0	0	2.65997	0	0	0.209
156	2	0	4.44431	0	0	0	0	0	0	4.91646	1	0	0.511161
158	2	0	0	0	0	-1.41204	0	1	0	3.24158	0	0	2.59134
159	3	0	0.433153	0	0	-0.398148	0	0	0	2.88245	0	0	-0.175744
162	0	0	0	0	0	0	-1.27623	0	0	4.26949	0	0	-0.474075
165	5	0	7.29627	0	0	0	0	0	0	4.25501	0	0	2.50834
166	4	0	0.9	0	8	0	0	0	0	4.88766	0	0	1.31845
167	4	0	0.9	0	8	0	0	0	0	4.88766	0	0	1.19351
168	0	0	0.672115	0	0	0	0	0	0	3.27732	2	0	0.371032
169	0	0	1.80717	0	0	0	0	0	0	3.66093	0	0	0.558537
171	0	0	0	0	1	0	0	0	0	4.35125	0	0	0.462398
172	1	0	1.05314	0	0	0	0	0	0	3.10124	4	0	-0.181686
173	4	0	2.27323	0	0	0	0	0	0	4.34414	0	0	0.812153
	Test Set
Compound No.	nO	nCsp	X4v	nRCNO	H-048	MaxdssC	MaxssssC	B01[C-F]	B05[O-S]	SAscore	C-026	nCconjX	pLOEL (experimental)
5	4	0	3.17791	0	0	-0.44396	0	0	0	3.91447	0	0	0.336482
9	1	0	0.714545	0	0	0	0	0	0	3.174	0	0	-0.577837
13	1	0	0.805387	0	0	0	0	0	0	3.56011	1	0	-0.31094
23	2	0	0.982983	0	0	0.197292	0	0	0	3.19242	1	0	-0.164785
26	2	0	0.349241	0	0	-0.712963	0	0	0	2.62186	0	0	-1.62494
27	2	0	0.0392837	0	0	0	0	0	0	3.73804	0	0	0.0796033
44	2	0	0.792858	0	0	-0.399907	0	0	0	3.00744	1	0	-0.519476
49	3	0	1.40694	0	0	-0.799604	0	0	0	3.10592	2	0	0.757187
50	2	0	2.4983	0	0	-0.426667	0	0	0	3.57731	4	0	0.318031
53	2	0	1.63986	0	0	-0.121241	0	0	0	3.44608	4	0	-0.268685
58	2	0	0.24536	0	0	-0.1875	0	0	0	2.90182	0	0	-0.943087
62	2	0	0.544131	0	0	-0.143611	0	0	0	2.96171	0	0	0.0560507
65	3	0	0.645625	0	0	0	0	0	0	2.89894	3	0	-0.113115
70	2	0	1.54699	0	0	-0.271481	0	0	0	3.80751	0	0	0.928928
73	1	0	0.614792	0	0	0	0	0	0	4.48939	0	0	-0.164741
86	2	0	1.01138	0	0	-0.30213	0	0	0	3.27431	1	0	-0.312322
93	0	0	0.710761	0	0	0	0	0	0	2.5301	2	0	0.0704073
96	0	0	0	0	0	0	0	0	0	4.19198	0	0	0.224608
97	0	0	0	0	0	0.111111	0	0	0	3.67348	0	0	0.384443
109	4	0	4.22482	0	0	0	0	0	0	3.50034	3	0	2.41274
111	3	0	2.40399	0	0	0	0	0	0	3.80182	4	0	0.808279
115	4	0	1.25935	0	0	-1.14032	0	0	0	4.01532	0	0	1.75289
125	0	0	12.098	0	0	0	0	0	0	4.29241	0	0	3.07711
127	2	0	0	0	0	-0.74537	0	0	0	2.68097	0	0	-0.425506
130	2	0	0.150087	0	2	-0.358796	0	0	0	3.48073	0	0	0.606897
136	8	0	1.34575	0	8	0	0	0	0	4.88842	0	0	0.295494
143	1	0	3.78423	0	0	0	0	0	0	3.8078	7	0	2.23328
153	2	0	0.882876	0	0	-0.415556	0	0	0	2.75378	1	0	0.253435
157	9	0	7.76199	0	0	-0.355323	0	0	0	5.23896	4	0	2.70526
160	3	0	2.38514	0	0	0	0	0	0	3.46487	2	0	-0.572936
161	0	0	1.26464	0	0	0	0	0	0	3.07302	4	0	1.80273
163	1	0	1.46405	0	0	0	0	0	0	3.32333	5	0	0.365263
164	8	0	5.50146	0	0	-0.41206	-1.76802	0	0	4.81026	1	0	-0.151488
170	0	0	0	0	0	0	0	0	0	4.8602	0	0	0.10161
174	0	0	0	0	1	0	0	0	0	3.64032	0	0	-0.20412

## Sheet: Dataset 4
Compound No.	Caninical smile	IUPAC	CAS No	Tested Species	pNOEL (experimental)
1	CC(C(=O)C)O	3-hydroxybutan-2-one	513-86-0	rat	-0.573439
2	CC(=O)C	propan-2-one	67-64-1	rat	-0.235899
3	CCCCO	butan-1-ol	71-36-3	rat	-0.226857
4	CCCCCCCCCCCCCCCCCC(=O)OC(C)C(=O)OC(C)C(=O)[O-].CCCCCCCCCCCCCCCCCC(=O)OC(C)C(=O)OC(C)C(=O)[O-].[Ca+2]	calcium;2-(2-octadecanoyloxypropanoyloxy)propanoate	5793-94-2	rat	-1.01578
5	CC(C)C1=CC=CC=C1	cumene	98-82-8	rat	-0.10758
6	CCCCC(CC)COC(=O)CCCCC(=O)OCC(CC)CCCC	bis(2-ethylhexyl) hexanedioate	103-23-1	rat	0.338503
7	CC1=C(C(=CC=C1)C)O	2,6-dimethylphenol	576-26-1	rat	2.30885
8	CC1=C(C=C(C=C1)O)C	3,4-dimethylphenol	95-65-8	rat	1.94087
9	CCCCCCCCCCCCOC(=O)C1=CC(=C(C(=C1)O)O)O	dodecyl 3,4,5-trihydroxybenzoate	1166-52-5	rat	1.52955
10	CCOC(=O)C	ethyl acetate	141-78-6	rat	-1.00917
11	CCOCC	ethoxyethane	60-29-7	rat	-0.828917
12	CCC1=CC=CC=C1	ethylbenzene	100-41-4	rat	-0.107496
13	CCC(CC)C(=O)O	2-ethylbutanoic acid	88-09-5	rat	-0.66241
14	CCC/C=C/C=O	(E)-hex-2-enal	505-57-7	rat	0.0888446
15	CC(=O)CCC1=CC=C(C=C1)O	4-(4-hydroxyphenyl)butan-2-one	5471-51-2	rat	0.215426
16	[H]N[C@@H]([C@@H](C)CC)C(=O)N[C@@H](CCCNC(N)=N)C(=O)N[C@@H]([C@@H](C)CC)C(=O)N[C@@H](CO)C(=O)N[C@@H](CCCCNC(=O)[C@@H]1N=CC[C@H]1C)C(=O)N[C@@H](CC(N)=O)C(=O)N[C@@H](CCC(O)=O)C(O)=O	IRISONE	8013-90-9	rat	1.986
17	CC(C)CCOC(=O)C1=CC=CC=C1O	3-methylbutyl 2-hydroxybenzoate	87-20-7	rat	1.64655
18	CC(C)O	propan-2-ol	67-63-0	rat	3.52367
19	CC(C)CC(=O)O	3-methylbutanoic acid	503-74-2	rat	-1.32401
20	CO	methanol	67-56-1	rat	-1.19314
21	CC(C)[C@H](CC1=CC=CC=C1)[C@@H](CC2=CC=CC=C2)O.CC(C)[C@H](CC1=CC=CC=C1)[C@@H](CC2=CC=CC=C2)OCC=C	(2R,3S)-3-benzyl-4-methyl-1-phenylpentan-2-ol;[(2R,3S)-3-benzyl-4-methyl-2-prop-2-enoxypentyl]benzene	38502-29-3	rat	1.42883
22	CC1=CC(=CC=C1)O	3-methylphenol	108-39-4	rat	0.335057
23	CC(C1=CC=CC=C1)OC(=O)C	1-phenylethyl acetate	93-92-5	rat	1.03933
24	CC(CC1=CC=CC=C1)O	1-phenylpropan-2-ol	698-87-3	rat	1.13421
25	C.[H]C(=O)C1=CC=CC=C1		1334-78-7	rat	-0.372102
26	C=CC(=O)O	prop-2-enoic acid	79-10-7	rat	0.133479
27	C=CCO	prop-2-en-1-ol	107-18-6	rat	1.08286
28	CC(=O)C(=O)C	butane-2,3-dione	431-03-8	rat	-0.0192394
29	CC(=O)O[C@H]1C[C@@H]2CC[C@]1(C2(C)C)C	[(1S,2S,4S)-1,7,7-trimethyl-2-bicyclo[2.2.1]heptanyl] acetate	125-12-2	rat	1.11687
30	C#CCO	prop-2-yn-1-ol	107-19-7	rat	1.04976
31	C1=CC=NC=C1	pyridine	110-86-1	rat	1.89823
32	C[C@@H]1[C@H]2C[C@]2(CC1=O)C(C)C	(1S,4R,5R)-4-methyl-1-propan-2-ylbicyclo[3.1.0]hexan-3-one	546-80-5	rat	1.48362
33	CC1=C(C=CC(=C1)Cl)OC(C)C(=O)O	2-(4-chloro-2-methylphenoxy)propanoic acid	93-65-2	rat	1.93381
34	C1CC2=CC=CC3=C2C1=CC=C3	1,2-dihydroacenaphthylene	83-32-9	mouse	-0.0548973
35	CC(=O)CC(=O)N	3-oxobutanamide	5977-14-0	rat	-0.243136
36	CC(=O)CC(=O)NS(O)(=O)=O	3-oxobutanoylsulfamic acid	99911-45-2	rat	-1.01208
37	C=CC(=O)N	prop-2-enamide	79-06-1	rat	2.55078
38	CC(C)(/C=N/OC(=O)NC)SC	[(E)-(2-methyl-2-methylsulfanylpropylidene)amino] N-methylcarbamate	116-06-3	rat	2.80232
39	CCNC1=NC(=NC(=N1)SC)NC(C)C	4-N-ethyl-6-methylsulfanyl-2-N-propan-2-yl-1,3,5-triazine-2,4-diamine	834-12-8	rat	1.35675
40	C1=CC=C2C(=C1)C(=CC=C2S(=O)(=O)[O-])N=NC3=C(C4=CC=CC=C4C(=C3)S(=O)(=O)[O-])O.[Na+].[Na+]	disodium;4-hydroxy-3-[(4-sulfonatonaphthalen-1-yl)diazenyl]naphthalene-1-sulfonate	3567-69-0	rat	0.263399
41	CC(C)N1C(=O)C2=CC=CC=C2NS1(=O)=O	2,2-dioxo-3-propan-2-yl-1H-2lambda6,1,3-benzothiadiazin-4-one	25057-89-0	rat	1.8367
42	CBr	bromomethane	74-83-9	rat	1.67642
43	C1CCC(=O)NCC1	azepan-2-one	105-60-2	rat	0.3548
44	C1=CC=C(C=C1)Cl	chlorobenzene	108-90-7	rat	0.352414
45	C(Cl)(Cl)Cl	chloroform	67-66-3	rat	0.599774
46	C1=CC=C2C=C(C=CC2=C1)Cl	2-chloronaphthalene	91-58-7	mouse	-0.186766
47	CC1=CC=CC=C1Cl	1-chloro-2-methylbenzene	95-49-8	rat	0.801369
48	C([C@@H]1[C@@H]2[C@@H]([C@H]([C@H](O1)O[C@@H]3[C@H](O[C@@H]([C@@H]([C@H]3O)O)O[C@@H]4[C@H](O[C@@H]([C@@H]([C@H]4O)O)O[C@@H]5[C@H](O[C@@H]([C@@H]([C@H]5O)O)O[C@@H]6[C@H](O[C@@H]([C@@H]([C@H]6O)O)O[C@@H]7[C@H](O[C@@H]([C@@H]([C@H]7O)O)O[C@@H]8[C@H](O[C@H](O2)[C@@H]([C@H]8O)O)CO)CO)CO)CO)CO)CO)O)O)O	(1S,3R,5R,6S,8R,10R,11S,13R,15R,16S,18R,20R,21S,23R,25R,26S,28R,30R,31S,33R,35R,36R,37R,38R,39R,40R,41R,42R,43R,44R,45R,46R,47R,48R,49R)-5,10,15,20,25,30,35-heptakis(hydroxymethyl)-2,4,7,9,12,14,17,19,22,24,27,29,32,34-tetradecaoxaoctacyclo[31.2.2.23,6.28,11.213,16.218,21.223,26.228,31]nonatetracontane-36,37,38,39,40,41,42,43,44,45,46,47,48,49-tetradecol	7585-39-9	rat	0.452982
49	C1=CC(=CC=C1Br)Br	1,4-dibromobenzene	106-37-6	rat	1.37273
50	C(C(CCl)O)Cl	1,3-dichloropropan-2-ol	96-23-1	rat	2.11056
51	C(=C/Cl)\Cl	(E)-1,2-dichloroethene	156-60-5	mouse	0.756054
52	C1=CC(=C(C=C1Cl)Cl)OCC(=O)O	2-(2,4-dichlorophenoxy)acetic acid	94-75-7	rat	2.34447
53	C(C(CCl)Cl)O	2,3-dichloropropan-1-ol	616-23-9	rat	1.11056
54	C(C=CCl)Cl	1,3-dichloroprop-1-ene	542-75-6	rat	1.56808
55	CCN(CC)C(=S)[S-].[Na+]	sodium;N,N-diethylcarbamodithioate	148-18-5	rat	0.696968
56	C1=CC(=CC(=C1)[N+](=O)[O-])[N+](=O)[O-]	1,3-dinitrobenzene	99-65-0	rat	2.62356
57	CCOP(=S)(C1=CC=CC=C1)OC2=CC=C(C=C2)[N+](=O)[O-]	ethoxy-(4-nitrophenoxy)-phenyl-sulfanylidene-lambda5-phosphane	2104-64-5	rat	3.11171
58	COCC(=O)NC1=C(C=CC(=C1)SC2=CC=CC=C2)N=C(NC(=O)OC)NC(=O)OC	methyl N-[N'-[2-[(2-methoxyacetyl)amino]-4-phenylsulfanylphenyl]-N-methoxycarbonylcarbamimidoyl]carbamate	58306-30-2	rat	2.34882
59	CN(C)C(=O)NC1=CC=CC(=C1)C(F)(F)F	1,1-dimethyl-3-[3-(trifluoromethyl)phenyl]urea	2164-17-2	rat	1.46283
60	C1=CC=C2C(=C1)C3=CC=CC4=C3C2=CC=C4	fluoranthene	206-44-0	mouse	0.209
61	C1C2=CC=CC=C2C3=CC=CC=C31	9H-fluorene	86-73-7	mouse	0.123799
62	CP(=O)(CCC(C(=O)O)N)O.N	2-amino-4-[hydroxy(methyl)phosphoryl]butanoic acid;azane	77182-82-2	rat	2.65598
63	C(=C(Cl)Cl)(C(=C(Cl)Cl)Cl)Cl	1,1,2,3,4,4-hexachlorobuta-1,3-diene	87-68-3	rat	2.41621
64	C1(=C(C(C(=C1Cl)Cl)(Cl)Cl)Cl)Cl	1,2,3,4,5,5-hexachlorocyclopenta-1,3-diene	77-47-4	rat	1.43576
65	C(C(Cl)(Cl)Cl)(Cl)(Cl)Cl	1,1,1,2,2,2-hexachloroethane	67-72-1	rat	2.37423
66	CCCN(CCC)C1=C(C=C(C=C1[N+](=O)[O-])C(C)C)[N+](=O)[O-]	2,6-dinitro-4-propan-2-yl-N,N-dipropylaniline	33820-53-0	rat	1.11947
67	C1=CC(=O)OC1=O	furan-2,5-dione	108-31-6	rat	0.389432
68	CCCCSP(SCCCC)SCCCC	tris(butylsulfanyl)phosphane	150-50-5	rat	3.47505
69	CCC1=CC=CC(=C1N(C(C)COC)C(=O)CCl)C	2-chloro-N-(2-ethyl-6-methylphenyl)-N-(1-methoxypropan-2-yl)acetamide	51218-45-2	rat	1.27697
70	C(=N)(N)N[N+](=O)[O-]	1-nitroguanidine	556-88-7	rat	-0.482278
71	C1=C(C(=C(C(=C1Br)Br)Br)Br)OC2=CC(=C(C(=C2Br)Br)Br)Br	1,2,3,4-tetrabromo-5-(2,3,4,5-tetrabromophenoxy)benzene	32536-52-0	rat	2.50414
72	C1N(CN(CN(CN1[N+](=O)[O-])[N+](=O)[O-])[N+](=O)[O-])[N+](=O)[O-]	1,3,5,7-tetranitro-1,3,5,7-tetrazocane	2691-41-0	rat	0.772615
73	CC1=C([N+](=O)C2=CC=CC=C2N1[O-])C(=O)NCCO	N-(2-hydroxyethyl)-3-methyl-4-oxido-1-oxoquinoxalin-1-ium-2-carboxamide	23696-28-8	rat	2.42042
74	CC(C)(C)[C@H]([C@@H](CC1=CC=C(C=C1)Cl)N2C=NC=N2)O	(2R,3R)-1-(4-chlorophenyl)-4,4-dimethyl-2-(1,2,4-triazol-1-yl)pentan-3-ol	76738-62-0	rat	1.37119
75	CCC(CC)NC1=C(C=C(C(=C1[N+](=O)[O-])C)C)[N+](=O)[O-]	3,4-dimethyl-2,6-dinitro-N-pentan-3-ylaniline	40487-42-1	rat	1.05131
76	C1=CC(=C(C=C1Br)Br)OC2=CC(=C(C=C2Br)Br)Br	1,2,4-tribromo-5-(2,4-dibromophenoxy)benzene	32534-81-9	rat	2.50382
77	C1=CC(=CC(=C1)N)N	benzene-1,3-diamine	108-45-2	rat	1.25592
78	CC(C)(C#C)NC(=O)C1=CC(=CC(=C1)Cl)Cl	3,5-dichloro-N-(2-methylbut-3-yn-2-yl)benzamide	23950-58-5	rat	2.01054
79	CC(C)N(C1=CC=CC=C1)C(=O)CCl	2-chloro-N-phenyl-N-propan-2-ylacetamide	1918-16-7	rat	1.20189
80	CC(C)OC(=O)NC1=CC=CC=C1	propan-2-yl N-phenylcarbamate	122-42-9	rat	0.554465
81	CCCOC(C1=CC=CC=C1)(C2=CC=CC=C2)C(=O)OC3CCN(CC3)C.Cl	(1-methylpiperidin-4-yl) 2,2-diphenyl-2-propoxyacetate;hydrochloride	54556-98-8	rat	2.26426
82	CC(C)C(C1=CC=C(C=C1)Cl)C(=O)OC(C#N)C2=CC(=CC=C2)OC3=CC=CC=C3	[cyano-(3-phenoxyphenyl)methyl] 2-(4-chlorophenyl)-3-methylbutanoate	51630-58-1	rat	2.22524
83	C1=CC2=C3C(=C1)C=CC4=CC=CC(=C43)C=C2	pyrene	129-00-0	mouse	0.430849
84	COC1=CC2=C(C=CN=C2C=C1)[C@H]([C@@H]3C[C@@H]4CCN3C[C@@H]4C=C)O.Cl	(R)-[(2S,4S,5R)-5-ethenyl-1-azabicyclo[2.2.2]octan-2-yl]-(6-methoxyquinolin-4-yl)methanol;hydrochloride	130-89-2	rat	0.909101
85	C(C(=O)[O-])F.[Na+]	sodium;2-fluoroacetate	62-74-8	rat	3.1934
86	C1=C(C(=CC(=C1Cl)Cl)Cl)Cl	1,2,4,5-tetrachlorobenzene	95-94-3	rat	2.80273
87	C1=C(C(=C(C(=C1Cl)Cl)Cl)O)Cl	2,3,4,6-tetrachlorophenol	58-90-2	rat	0.967323
88	CCOP(=S)(OCC)OP(=S)(OCC)OCC	diethoxyphosphinothioyloxy-diethoxy-sulfanylidene-λ5-phosphane	3689-24-5	rat	2.80937
89	C[C@]12C=C(O)C3=C4CCC(=O)C=C4CC[C@H]3[C@@H]1CC[C@@H]2O	(10S,11S,14S,15R)‐14,17‐dihydroxy‐15‐methyltetracyclo[8.7.0.0²,⁷.0¹¹,¹⁵]heptadeca‐1,6,16‐trien‐5‐one		rat	3.85491
90	C1=C(C(=CC(=C1Cl)Cl)Cl)O	2,4,5-trichlorophenol	95-95-4	rat	0.295435

## Sheet: IM4
	Training Set
Compound No.	nCrq	H-051	minssCH2	B01[C-C]	B03[C-C]	B04[N-N]	B05[C-O]	F01[S-P]	F02[O-O]	B07[C-C]	Eta_alpha_A	nRCONR2	pNOEL (experimental)
1	0	3	0	1	1	0	0	0	0	0	0.444444	0	-0.573439
2	0	6	0	1	0	0	0	0	0	0	0.458333	0	-0.235899
3	0	0	0.34375	1	1	0	0	0	0	0	0.466667	0	-0.226857
4	0	2	0.255869	1	1	0	1	0	3	1	0.466667	0	-1.01578
5	0	0	0	1	1	0	0	0	0	0	0.5	0	-0.10758
6	0	4	0.394422	1	1	0	1	0	2	1	0.474359	0	0.338503
7	0	0	0	1	1	0	0	0	0	0	0.481481	0	2.30885
10	0	3	0.481481	1	1	0	0	0	1	0	0.444444	0	-1.00917
11	0	0	0.84375	1	1	0	0	0	0	0	0.466667	0	-0.828917
12	0	0	1.13972	1	1	0	0	0	0	0	0.5	0	-0.107496
13	0	1	0.741898	1	1	0	0	0	1	0	0.458333	0	-0.66241
14	0	0	1.01264	1	1	0	1	0	0	0	0.47619	0	0.0888446
15	0	5	0.574182	1	1	0	1	0	0	1	0.472222	0	0.215426
16	0	6	-1.01771	1	1	1	1	0	2	1	0.44902	0	1.986
17	0	0	0.393685	1	1	0	1	0	1	1	0.466667	0	1.64655
18	0	0	0	1	0	0	0	0	0	0	0.458333	0	3.52367
19	0	2	0.277778	1	1	0	0	0	1	0	0.452381	0	-1.32401
20	0	0	0	0	0	0	0	0	0	0	0.416667	0	-1.19314
23	0	3	0	1	1	0	1	0	1	1	0.472222	0	1.03933
25	0	0	0	1	1	0	1	0	0	0	0.479167	0	-0.372102
26	0	0	0	1	0	0	0	0	1	0	0.433333	0	0.133479
29	2	3	1.0725	1	1	0	1	0	1	0	0.47619	0	1.11687
30	0	0	-0.152778	1	0	0	0	0	0	0	0.458333	0	1.04976
31	0	0	0	1	1	0	0	0	0	0	0.483333	0	1.89823
32	1	3	0.871528	1	1	0	1	0	0	0	0.484848	0	1.48362
33	0	0	0	1	1	0	1	0	1	0	0.479592	0	1.93381
34	0	0	1.23282	1	1	0	0	0	0	0	0.5	0	-0.0548973
35	0	5	-0.138889	1	1	0	0	0	0	0	0.438095	0	-0.243136
37	0	0	0	1	0	0	0	0	0	0	0.446667	0	2.55078
38	0	0	0	1	1	0	1	0	1	1	0.483333	0	2.80232
39	0	0	0.804517	1	1	1	0	0	0	1	0.488889	0	1.35675
40	0	0	0	1	1	0	1	0	6	1	0.477419	0	0.263399
41	0	0	0	1	1	0	1	0	1	1	0.477083	0	1.8367
42	0	0	0	0	0	0	0	0	0	0	0.916667	0	1.67642
43	0	2	0.736111	1	1	0	0	0	0	0	0.466667	0	0.3548
44	0	0	0	1	1	0	0	0	0	0	0.530612	0	0.352414
45	0	0	0	0	0	0	0	0	0	0	0.660714	0	0.599774
47	0	0	0	1	1	0	0	0	0	0	0.526786	0	0.801369
48	0	0	-1.04676	1	1	0	1	0	7	1	0.424242	0	0.452982
49	0	0	0	1	1	0	0	0	0	0	0.708333	0	1.37273
50	0	0	0.225694	1	0	0	0	0	0	0	0.543651	0	2.11056
51	0	0	0	1	0	0	0	0	0	0	0.607143	0	0.756054
52	0	0	-0.415325	1	1	0	1	0	1	0	0.494505	0	2.34447
53	0	0	-0.0366512	1	0	0	0	0	0	0	0.543651	0	1.11056
54	0	0	0.503472	1	0	0	0	0	0	0	0.585714	0	1.56808
55	0	0	0.957176	1	1	0	0	0	0	0	0.570833	0	0.696968
56	0	0	0	1	1	1	1	0	2	0	0.427778	0	2.62356
59	0	0	0	1	1	0	1	0	0	1	0.436905	0	1.46283
61	0	0	1.10352	1	1	0	0	0	0	0	0.5	0	0.123799
63	0	0	0	1	1	0	0	0	0	0	0.628571	0	2.41621
64	0	0	0	1	0	0	0	0	0	0	0.616883	0	1.43576
65	0	0	0	1	0	0	0	0	0	0	0.660714	0	2.37423
66	0	0	0.552128	1	1	1	1	0	2	1	0.456061	0	1.11947
67	0	0	0	1	0	0	0	0	2	0	0.428571	0	0.389432
68	0	0	1.34269	1	1	0	0	3	0	1	0.59375	0	3.47505
69	0	0	-0.0222789	1	1	0	1	0	0	1	0.488471	1	1.27697
70	0	0	0	0	0	0	0	0	1	0	0.395238	0	-0.482278
71	0	0	0	1	1	0	0	0	0	1	0.809524	0	2.50414
72	0	0	-0.949722	0	0	1	1	0	4	0	0.393333	0	0.772615
73	0	0	-0.241467	1	1	1	1	0	0	1	0.449123	0	2.42042
74	0	0	0.679529	1	1	0	1	0	0	1	0.487381	0	1.37119
75	0	0	0.733862	1	1	1	1	0	2	1	0.451667	0	1.05131
77	0	0	0	1	1	1	0	0	0	0	0.475	0	1.25592
78	0	0	0	1	1	0	1	0	0	1	0.510119	0	2.01054
79	0	0	0.020907	1	1	0	1	0	0	0	0.496259	1	1.20189
81	0	0	0.478465	1	1	0	1	0	1	1	0.477778	0	2.26426
83	0	0	0	1	1	0	0	0	0	1	0.5	0	0.430849
84	0	0	1.0161	1	1	0	1	0	0	1	0.477778	0	0.909101
85	0	0	-1.27778	1	0	0	0	0	1	0	0.390476	0	3.1934
86	0	0	0	1	1	0	0	0	0	0	0.585714	0	2.80273
88	0	0	0.393711	1	0	0	1	2	6	1	0.54902	0	2.80937
90	0	0	0	1	1	0	0	0	0	0	0.547619	0	0.295435
	Test Set
Compound No.	nCrq	H-051	minssCH2	B01[C-C]	B03[C-C]	B04[N-N]	B05[C-O]	F01[S-P]	F02[O-O]	B07[C-C]	Eta_alpha_A	nRCONR2	pNOEL (experimental)
8	0	0	0	1	1	0	1	0	0	0	0.481481	0	1.94087
9	0	0	0.317196	1	1	0	1	0	1	1	0.465278	0	1.52955
21	0	0	0.732659	1	1	0	1	0	0	1	0.491667	0	1.42883
22	0	0	0	1	1	0	0	0	0	0	0.479167	0	0.335057
24	0	0	0.750833	1	1	0	1	0	0	0	0.483333	0	1.13421
27	0	0	0.0833333	1	0	0	0	0	0	0	0.458333	0	1.08286
28	0	6	0	1	1	0	0	0	0	0	0.444444	0	-0.0192394
36	0	5	-0.555764	1	1	0	1	0	3	0	0.445455	0	-1.01208
46	0	0	0	1	1	0	0	0	0	0	0.519481	0	-0.186766
57	0	0	0.429716	1	1	0	1	1	2	1	0.503175	0	3.11171
58	0	0	-0.159833	1	1	0	1	0	2	1	0.465591	0	2.34882
60	0	0	0	1	1	0	0	0	0	0	0.5	0	0.209
62	0	0	-0.0412037	1	1	0	1	0	2	0	0.475758	0	2.65598
76	0	0	0	1	1	0	0	0	0	1	0.722222	0	2.50382
80	0	0	0	1	1	0	1	0	1	1	0.466667	0	0.554465
82	0	1	0	1	1	0	1	0	1	1	0.487143	0	2.22524
87	0	0	0	1	1	0	0	0	0	0	0.562771	0	0.967323
89	1	2	0.562394	1	1	0	1	0	0	1	0.47619	0	3.85491

## Sheet: Chronic _LOEL_Approved
TestCompNo	NAME	Score(MAE-LOO)	Score(Proximity Train YObs Mean)	Score(Similarity based AD)	CompositeScore	PredictionQuality	YPred(Test)	AD status	Closest Training Compound	Euclidean Distance	Generalized Jaccard Coeff.
2081	DB11768	1	2	2	2	Moderate	3.45879	In	21	0.499446	0.691765
1297	DB04572	1	2	2	2	Moderate	2.94814	In	16	0.12995	0.851339
1015	DB01190	1	3	2	3	Good	2.78989	In	39	0.48393	0.697459
1656	DB09050	1	3	2	3	Good	2.72586	In	24	0.107812	0.917336
1116	DB01332	1	3	2	3	Good	2.69069	In	24	0.101961	0.920782
399	DB00535	1	3	2	3	Good	2.67862	In	24	0.0999633	0.92197				Toxic
1543	DB06820	1	3	2	3	Good	2.67508	In	18	0.498133	0.714691				Non-toxic
499	DB00639	1	3	2	3	Good	2.66194	In	18	0.498114	0.715561
1157	DB01416	1	3	2	3	Good	2.65719	In	24	0.0964322	0.924087
425	DB00562	1	3	2	3	Good	2.64987	In	18	0.498108	0.716363
362	DB00493	1	3	2	3	Good	2.63875	In	24	0.0934106	0.925917
530	DB00671	1	3	2	3	Good	2.63875	In	24	0.0934106	0.925917
2117	DB11995	1	3	3	3	Good	2.59589	In	43	0.149334	0.859952
2255	DB13256	1	3	2	3	Good	2.49981	In	18	0.486814	0.729215
570	DB00713	1	3	2	3	Good	2.48369	In	24	0.120186	0.910206
888	DB01057	1	3	2	3	Good	2.46677	In	6	0.0414953	0.961045
939	DB01112	1	3	2	3	Good	2.46376	In	24	0.0877184	0.945713
305	DB00433	1	3	2	3	Good	2.45604	In	18	0.486126	0.732241
969	DB01143	1	3	2	3	Good	2.4135	In	6	0.0401469	0.968865
448	DB00585	1	3	2	3	Good	2.3929	In	24	0.0558355	0.951022
346	DB00477	1	3	2	3	Good	2.35476	In	18	0.485123	0.739341
1062	DB01239	1	3	2	3	Good	2.35476	In	18	0.485123	0.739341
1759	DB09225	1	3	2	3	Good	2.33742	In	18	0.485034	0.740571
960	DB01133	1	3	2	3	Good	2.28732	In	47	0.493854	0.605624
1490	DB06725	1	3	3	3	Good	2.28163	In	43	0.129448	0.893143
1997	DB11327	1	3	3	3	Good	2.26442	In	58	0.167991	0.842363
432	DB00569	1	3	2	3	Good	2.24013	In	70	0.200552	0.786542
626	DB00772	1	3	2	3	Good	2.22376	In	56	0	1
710	DB00863	1	3	2	3	Good	2.20903	In	24	0.0425767	0.972893
2044	DB11632	1	3	3	3	Good	2.19958	In	17	0.0939057	0.917545
1108	DB01324	1	3	2	3	Good	2.16827	In	47	0.485823	0.672671
118	DB00239	1	3	3	3	Good	2.16632	In	17	0.110799	0.932062
1208	DB01607	1	3	2	3	Good	2.15871	In	39	0.0710428	0.9275
344	DB00475	1	3	3	3	Good	2.14925	In	17	0.101729	0.923606
327	DB00456	1	3	2	3	Good	2.14664	In	39	0.0690947	0.929122
2140	DB12265	1	3	2	3	Good	2.13737	In	24	0.105322	0.911221
1156	DB01415	1	3	2	3	Good	2.13551	In	39	0.0673227	0.930621
1410	DB06211	1	3	2	3	Good	2.13551	In	39	0.0673227	0.930621
2150	DB12343	1	3	2	3	Good	2.13551	In	39	0.0673227	0.930621
1115	DB01331	1	3	2	3	Good	2.12521	In	39	0.0657062	0.932013
1031	DB01206	1	3	3	3	Good	2.12058	In	17	0.218054	0.865783
696	DB00848	1	3	2	3	Good	2.10152	In	39	0.116654	0.894083
340	DB00471	1	3	2	3	Good	2.10025	In	18	0.49182	0.710955
1078	DB01256	1	3	2	3	Good	2.09991	In	39	0.0832461	0.938181
2352	DB13995	1	3	2	3	Good	2.07831	In	4	0.0987868	0.80757
1675	DB09075	1	3	3	3	Good	2.07452	In	123	0.110399	0.875384
845	DB01007	1	3	3	3	Good	2.0697	In	43	0.0819065	0.94695
1876	DB09511	1	3	3	3	Good	2.04591	In	4	0.0542837	0.887288
769	DB00927	1	3	2	3	Good	2.0448	In	39	0.0802572	0.940268
1550	DB07565	1	3	3	3	Good	2.04059	In	17	0.151095	0.887925
2482	DB14658	1	3	3	3	Good	2.04059	In	17	0.151095	0.887925
683	DB00833	1	3	2	3	Good	2.03992	In	39	0.0834705	0.899299
789	DB00948	1	3	2	3	Good	2.03992	In	39	0.0834705	0.899299
275	DB00402	1	3	3	3	Good	2.01147	In	123	0.118593	0.885411
1023	DB01198	1	3	3	3	Good	2.01147	In	123	0.118593	0.885411
838	DB01000	1	3	2	3	Good	2.00233	In	39	0.0640355	0.951759
2192	DB12825	1	3	2	3	Good	1.9974	In	39	0.0630652	0.952455
1117	DB01333	1	3	2	3	Good	1.98798	In	39	0.0612104	0.953788
2208	DB12978	1	3	3	3	Good	1.98015	In	123	0.114125	0.889254
1426	DB06268	1	3	3	3	Good	1.97835	In	17	0.131993	0.870407
595	DB00739	1	3	2	3	Good	1.96798	In	39	0.0924133	0.911032
616	DB00760	1	3	2	3	Good	1.96277	In	39	0.0562474	0.957376
17	DB00121	1	3	2	3	Good	1.90687	In	39	0.0452425	0.965427
2257	DB13258	1	3	3	3	Good	1.90564	In	17	0.080746	0.939317
2484	DB14674	1	3	3	3	Good	1.90157	In	43	0.0409228	0.973792
1417	DB06228	1	3	3	3	Good	1.90015	In	43	0.0421609	0.966638
892	DB01061	1	3	2	3	Good	1.8975	In	39	0.0801421	0.920239
885	DB01053	1	3	2	3	Good	1.8704	In	39	0.0755702	0.92383
1178	DB01559	1	3	3	3	Good	1.86697	In	43	0.0410706	0.970864
561	DB00703	1	3	2	3	Good	1.86092	In	39	0.0401286	0.969214
1199	DB01598	1	3	2	3	Good	1.85932	In	39	0.035882	0.972382
195	DB00319	1	3	2	3	Good	1.85605	In	39	0.0731916	0.925743
287	DB00415	1	3	2	3	Good	1.85605	In	39	0.0731916	0.925743
289	DB00417	1	3	2	3	Good	1.85605	In	39	0.0731916	0.925743
430	DB00567	1	3	2	3	Good	1.85605	In	39	0.0731916	0.925743
2231	DB13166	1	3	2	3	Good	1.85179	In	35	0.0942396	0.908256
1443	DB06448	1	3	3	3	Good	1.85148	In	43	0.0601608	0.93929
2277	DB13337	1	3	2	3	Good	1.84291	In	39	0.0710428	0.9275
441	DB00578	1	3	2	3	Good	1.83084	In	39	0.0690947	0.929122
1225	DB01628	1	3	3	3	Good	1.81954	In	43	0.0413662	0.969113
1764	DB09242	1	3	3	3	Good	1.81842	In	123	0.0944891	0.909638
1806	DB09343	1	3	3	3	Good	1.81842	In	123	0.0944891	0.909638
2016	DB11560	1	3	2	3	Good	1.81372	In	35	0.0479123	0.958823
1224	DB01627	1	3	2	3	Good	1.81087	In	39	0.0263437	0.979574
1011	DB01186	1	3	2	3	Good	1.80983	In	35	0.0535414	0.951805
548	DB00689	1	3	2	3	Good	1.80941	In	39	0.0657062	0.932013
66	DB00185	1	3	2	3	Good	1.80851	In	2	0.431783	0.488809
899	DB01068	1	3	3	3	Good	1.80193	In	17	0.0493066	0.962231
2183	DB12713	1	3	2	3	Good	1.78806	In	27	0.492444	0.652232
212	DB00337	1	3	3	3	Good	1.78438	In	123	0.09131	0.914049
1203	DB01602	1	3	2	3	Good	1.77494	In	39	0.0604747	0.936703
1151	DB01406	1	3	3	3	Good	1.7727	In	58	0.123554	0.907792
979	DB01153	1	3	3	3	Good	1.77148	In	21	0.126483	0.876305
1021	DB01196	1	3	3	3	Good	1.76822	In	43	0.0101426	0.993374
516	DB00656	1	3	3	3	Good	1.76522	In	43	0.0612215	0.933908
2130	DB12127	1	3	2	3	Good	1.73276	In	39	0.123233	0.843251
140	DB00261	1	3	3	3	Good	1.72527	In	43	0.0495892	0.956633
556	DB00697	1	3	3	3	Good	1.72527	In	43	0.0495892	0.956633
1295	DB04570	1	3	2	3	Good	1.72411	In	35	0.0827476	0.940047
806	DB00967	1	3	3	3	Good	1.72138	In	43	0.0556105	0.949571
891	DB01060	1	3	2	3	Good	1.71098	In	35	0.0830953	0.938317
966	DB01140	1	3	2	3	Good	1.71098	In	35	0.0830953	0.938317
2039	DB11614	1	3	3	3	Good	1.70849	In	43	0.0538916	0.951151
745	DB00902	1	3	2	3	Good	1.70572	In	35	0.0399272	0.974575
2273	DB13292	1	3	2	3	Good	1.70572	In	35	0.0399272	0.974575
230	DB00355	1	3	3	3	Good	1.70507	In	58	0.0885336	0.911479
2461	DB14568	1	3	3	3	Good	1.69245	In	43	0.058121	0.94285
2176	DB12597	1	3	3	3	Good	1.68928	In	43	0.0580658	0.943244
976	DB01150	1	3	2	3	Good	1.68777	In	35	0.0839105	0.93526
2022	DB11581	1	3	3	3	Good	1.68686	In	17	0.0952937	0.919327
1531	DB06803	1	3	3	3	Good	1.68616	In	17	0.0362832	0.97839
215	DB00340	1	3	2	3	Good	1.6779	In	35	0.0343184	0.978068
370	DB00501	1	3	2	3	Good	1.67705	In	39	0	1
1198	DB01597	1	3	2	3	Good	1.67705	In	39	0	1
1397	DB06155	1	3	3	3	Good	1.67424	In	21	0.0717138	0.924585
2026	DB11586	1	3	3	3	Good	1.66831	In	43	0.00991526	0.993479
1228	DB01656	1	3	3	3	Good	1.6624	In	43	0.011102	0.992699
225	DB00350	1	3	3	3	Good	1.65725	In	58	0.100952	0.923367
486	DB00626	1	3	2	3	Good	1.65299	In	39	0.0454014	0.953677
1323	DB04839	1	3	3	3	Good	1.65124	In	23	0.132931	0.831761
2154	DB12377	1	3	3	3	Good	1.65071	In	58	0.0751478	0.921527
442	DB00579	1	3	3	3	Good	1.64818	In	18	0.0719133	0.93701
937	DB01110	1	3	3	3	Good	1.64641	In	21	0.118489	0.889124
1620	DB08943	1	3	3	3	Good	1.64641	In	21	0.118489	0.889124
1135	DB01369	1	3	2	3	Good	1.64223	In	35	0.0411	0.972812
774	DB00933	1	3	2	3	Good	1.64174	In	35	0.0604318	0.939388
438	DB00575	1	3	3	3	Good	1.64097	In	55	0.0145147	0.990386
1384	DB06016	1	3	3	3	Good	1.64097	In	55	0.0145147	0.990386
2324	DB13911	1	3	2	3	Good	1.6399	In	47	0.347925	0.692392
2182	DB12710	1	3	2	3	Good	1.62984	In	35	0.0246304	0.984162
1340	DB04880	1	3	2	3	Good	1.62893	In	35	0.0870771	0.927509
1575	DB08865	1	3	3	3	Good	1.6223	In	43	0.041575	0.969238
1481	DB06713	1	3	3	3	Good	1.62209	In	58	0.0940692	0.928217
1039	DB01215	1	3	3	3	Good	1.61727	In	18	0.0669413	0.940633
741	DB00897	1	3	3	3	Good	1.61622	In	18	0.0589164	0.94824
326	DB00455	1	3	3	3	Good	1.61567	In	43	0.0440982	0.962683
1518	DB06786	1	3	3	3	Good	1.61346	In	23	0.130248	0.837947
2287	DB13595	1	3	3	3	Good	1.61271	In	9	0.115296	0.789575
1813	DB09353	1	3	2	3	Good	1.60793	In	4	0.0805797	0.874708
954	DB01127	1	3	3	3	Good	1.60761	In	21	0.064697	0.932139
418	DB00555	1	3	3	3	Good	1.6065	In	55	0.00757288	0.994961
1341	DB04890	1	3	3	3	Good	1.59933	In	123	0.0554396	0.961324
2306	DB13801	1	3	3	3	Good	1.59242	In	55	0.00473949	0.99684
1780	DB09282	1	3	3	3	Good	1.59141	In	58	0.0880648	0.932489
277	DB00404	1	3	3	3	Good	1.58945	In	18	0.0626383	0.943919
456	DB00594	1	3	3	3	Good	1.58861	In	123	0.0823115	0.940268
1792	DB09319	1	3	2	3	Good	1.58526	In	35	0.0156416	0.989883
1153	DB01409	1	3	3	3	Good	1.58142	In	46	0.111705	0.853359
1220	DB01623	1	3	2	3	Good	1.57881	In	35	0.0582481	0.94676
2109	DB11952	1	3	3	3	Good	1.57656	In	18	0.0607096	0.945449
2189	DB12792	1	3	3	3	Good	1.57002	In	21	0.0320654	0.979374
1204	DB01603	1	3	2	3	Good	1.56697	In	35	0.0436281	0.963579
797	DB00957	1	3	3	3	Good	1.56442	In	58	0.0827809	0.936282
1191	DB01588	1	3	3	3	Good	1.56428	In	18	0.0589164	0.946911
141	DB00262	1	3	3	3	Good	1.55362	In	17	0.491157	0.58797
485	DB00625	1	3	3	3	Good	1.55116	In	43	0.0410706	0.970864
1616	DB08936	1	3	3	3	Good	1.55116	In	43	0.0410706	0.970864
2086	DB11800	1	3	3	3	Good	1.54943	In	17	0.0506993	0.961927
1206	DB01605	1	3	2	3	Good	1.54912	In	39	0.0937213	0.907576
2389	DB14174	1	3	3	3	Good	1.54837	In	70	0.0928502	0.913348
981	DB01155	1	3	3	3	Good	1.54816	In	58	0.079597	0.938582
824	DB00985	1	3	3	3	Good	1.5473	In	123	0.0449352	0.968421
739	DB00895	1	3	2	3	Good	1.54512	In	39	0.0401286	0.969214
469	DB00607	1	3	2	3	Good	1.54086	In	35	0.00668975	0.995648
86	DB00205	1	3	3	3	Good	1.54049	In	123	0.0435597	0.969358
2497	DB14763	1	3	3	3	Good	1.54049	In	123	0.0435597	0.969358
125	DB00246	1	3	3	3	Good	1.53728	In	18	0.0781203	0.91925
130	DB00251	1	3	3	3	Good	1.53567	In	18	0.0485356	0.957712
864	DB01026	1	3	3	3	Good	1.53567	In	18	0.0485356	0.957712
1380	DB05667	1	3	3	3	Good	1.53567	In	18	0.0485356	0.957712
1504	DB06769	1	3	3	3	Good	1.53446	In	55	0.00693239	0.995364
1473	DB06705	1	3	3	3	Good	1.53442	In	12	0.0668715	0.923924
975	DB01149	1	3	3	3	Good	1.53382	In	43	0.0409228	0.973086
292	DB00420	1	3	2	3	Good	1.52687	In	35	0.0038705	0.997477
900	DB01069	1	3	2	3	Good	1.52687	In	35	0.0038705	0.997477
2075	DB11750	1	3	3	3	Good	1.52257	In	23	0.125459	0.853211
2229	DB13158	1	3	3	3	Good	1.52257	In	23	0.125459	0.853211
861	DB01023	1	3	3	3	Good	1.52149	In	55	0.0095439	0.993617
136	DB00257	1	3	3	3	Good	1.52051	In	18	0.0529349	0.95216
1093	DB01282	1	3	2	3	Good	1.51734	In	39	0.082835	0.926135
933	DB01105	1	3	3	3	Good	1.51695	In	123	0.0388077	0.972609
941	DB01114	1	3	3	3	Good	1.51695	In	123	0.0388077	0.972609
1414	DB06216	1	3	3	3	Good	1.51625	In	18	0.0595809	0.962414
168	DB00291	1	3	3	3	Good	1.50861	In	123	0.0411558	0.971
876	DB01042	1	3	3	3	Good	1.50861	In	123	0.0411558	0.971
1069	DB01246	1	3	2	3	Good	1.50768	In	35	0	1
1746	DB09167	1	3	2	3	Good	1.50768	In	35	0	1
458	DB00596	1	3	3	3	Good	1.50751	In	33	0.124241	0.82829
604	DB00748	1	3	3	3	Good	1.50701	In	123	0.0368004	0.973989
2051	DB11642	1	3	3	3	Good	1.50701	In	123	0.0368004	0.973989
859	DB01021	1	3	3	3	Good	1.506	In	47	0.00196741	0.998284
2328	DB13941	1	3	3	3	Good	1.50422	In	18	0.0738042	0.922881
161	DB00283	1	3	3	3	Good	1.50373	In	43	0.0413662	0.969113
1745	DB09165	1	3	3	3	Good	1.50177	In	10	0.120655	0.758599
1190	DB01587	1	3	3	3	Good	1.50135	In	18	0.0505612	0.954475
768	DB00925	1	3	3	3	Good	1.49804	In	123	0.0349906	0.975237
804	DB00964	1	3	3	3	Good	1.4906	In	21	0.016157	0.9895
932	DB01104	1	3	3	3	Good	1.49037	In	18	0.044168	0.963123
2141	DB12267	1	3	3	3	Good	1.49037	In	18	0.044168	0.963123
265	DB00392	1	3	2	3	Good	1.49034	In	35	0.00349593	0.997716
1939	DB11155	1	3	3	3	Good	1.48889	In	21	0.0579904	0.945908
1630	DB08967	1	3	2	3	Good	1.48697	In	35	0.0599361	0.939951
2364	DB14048	1	3	3	3	Good	1.48604	In	4	0.0846935	0.826759
89	DB00208	1	3	3	3	Good	1.48583	In	68	0.0644554	0.913991
383	DB00518	1	3	2	3	Good	1.48455	In	35	0.0516355	0.952722
811	DB00972	1	3	3	3	Good	1.48374	In	18	0.0485356	0.956615
395	DB00531	1	3	3	3	Good	1.48372	In	33	0.0561192	0.910342
1006	DB01181	1	3	3	3	Good	1.48372	In	33	0.0561192	0.910342
67	DB00186	1	3	3	3	Good	1.47117	In	18	0.0427502	0.965435
398	DB00534	1	3	3	3	Good	1.47043	In	123	0.110399	0.870029
851	DB01013	1	3	3	3	Good	1.46836	In	33	0.116809	0.835453
216	DB00341	1	3	3	3	Good	1.46739	In	43	0.0430412	0.964315
1428	DB06282	1	3	3	3	Good	1.46739	In	43	0.0430412	0.964315
2012	DB11431	1	3	3	3	Good	1.46684	In	58	0.0636776	0.950255
318	DB00446	1	3	2	3	Good	1.45904	In	17	0.263938	0.794825
1768	DB09267	1	3	3	3	Good	1.45899	In	42	0.109953	0.852193
1209	DB01608	1	3	2	3	Good	1.45787	In	35	0.0443065	0.963697
407	DB00543	1	3	3	3	Good	1.45752	In	18	0.0479783	0.96951
2202	DB12941	1	3	3	3	Good	1.4571	In	55	0.0435384	0.963197
1367	DB05260	1	3	3	3	Good	1.45689	In	92	0.163795	0.781427
2447	DB14527	1	3	3	3	Good	1.45689	In	92	0.163795	0.781427
187	DB00310	1	3	3	3	Good	1.45383	In	18	0.0417252	0.967532
2315	DB13872	1	3	3	3	Good	1.45383	In	18	0.0417252	0.967532
255	DB00381	1	3	3	3	Good	1.45366	In	123	0.0260296	0.981461
1761	DB09237	1	3	3	3	Good	1.45366	In	123	0.0260296	0.981461
2068	DB11718	1	3	3	3	Good	1.44804	In	21	0.00763463	0.995011
2145	DB12301	1	3	3	3	Good	1.44754	In	55	0.0429354	0.964425
1238	DB01987	1	3	3	3	Good	1.44692	In	42	0.109168	0.854221
693	DB00845	1	3	3	3	Good	1.44556	In	18	0.0670322	0.929396
1009	DB01184	1	3	3	3	Good	1.44463	In	18	0.0454314	0.971082
1571	DB08828	1	3	3	3	Good	1.43934	In	18	0.0900725	0.925287
679	DB00829	1	3	3	3	Good	1.43843	In	18	0.044168	0.962161
690	DB00842	1	3	3	3	Good	1.43843	In	18	0.044168	0.962161
468	DB00606	1	3	3	3	Good	1.43651	In	27	0.0752712	0.908513
238	DB00363	1	3	3	3	Good	1.43235	In	18	0.0430058	0.972583
280	DB00408	1	3	3	3	Good	1.43235	In	18	0.0430058	0.972583
542	DB00683	1	3	3	3	Good	1.43235	In	18	0.0430058	0.972583
100	DB00220	1	3	2	3	Good	1.42752	In	35	0.016161	0.98944
1834	DB09397	1	3	2	3	Good	1.42726	In	4	0.154991	0.72303
267	DB00394	1	3	3	3	Good	1.4269	In	33	0.109012	0.843173
1388	DB06144	1	3	3	3	Good	1.42642	In	18	0.0418357	0.973309
2379	DB14116	1	3	3	3	Good	1.42406	In	4	0.0894533	0.814312
681	DB00831	1	3	2	3	Good	1.42398	In	35	0.0422318	0.96786
1454	DB06626	1	3	2	3	Good	1.42398	In	35	0.0422318	0.96786
111	DB00231	1	3	3	3	Good	1.41923	In	18	0.0427502	0.964531
224	DB00349	1	3	3	3	Good	1.41923	In	18	0.0427502	0.964531
64	DB00183	1	3	2	3	Good	1.41507	In	35	0.0611418	0.943568
478	DB00618	1	3	3	3	Good	1.41326	In	18	0.0423687	0.965271
1192	DB01589	1	3	3	3	Good	1.4106	In	18	0.0403402	0.972801
2239	DB13213	1	3	2	3	Good	1.40892	In	35	0.0416375	0.969722
121	DB00242	1	3	2	3	Good	1.40598	In	123	0.272469	0.759722
2412	DB14201	1	3	3	3	Good	1.40465	In	12	0.0919449	0.908898
218	DB00343	1	3	2	3	Good	1.40405	In	35	0.0208914	0.98635
488	DB00628	1	3	3	3	Good	1.40189	In	18	0.0417252	0.966681
1692	DB09093	1	3	3	3	Good	1.40189	In	18	0.0417252	0.966681
1205	DB01604	1	3	2	3	Good	1.40115	In	39	0.100491	0.884094
539	DB00680	1	3	2	3	Good	1.39494	In	35	0.0412785	0.971457
614	DB00758	1	3	3	3	Good	1.39434	In	68	0.0516023	0.930244
686	DB00836	1	3	3	3	Good	1.39123	In	18	0.0412241	0.968008
1360	DB05057	1	3	2	3	Good	1.38829	In	2	0.404575	0.559818
1619	DB08942	1	3	3	3	Good	1.38684	In	57	0.0672017	0.920871
491	DB00631	1	3	2	3	Good	1.38461	In	123	0.271225	0.761649
489	DB00629	1	3	3	3	Good	1.37668	In	20	0	1
856	DB01018	1	3	3	3	Good	1.37668	In	20	0	1
1893	DB09570	1	3	3	3	Good	1.37668	In	20	0	1
2233	DB13170	1	3	3	3	Good	1.37644	In	70	0.0543585	0.94738
1668	DB09068	1	3	2	3	Good	1.37574	In	35	0.0410966	0.97385
1321	DB04837	1	3	3	3	Good	1.37508	In	55	0.0410965	0.971208
652	DB00801	1	3	3	3	Good	1.3718	In	18	0.0405765	0.970436
1592	DB08890	1	3	3	3	Good	1.36549	In	12	0.106465	0.888137
1061	DB01238	1	3	3	3	Good	1.35843	In	18	0.05977	0.939245
470	DB00608	1	3	3	3	Good	1.35799	In	55	0.041407	0.968907
557	DB00698	1	3	3	3	Good	1.35731	In	58	0.0422351	0.966444
276	DB00403	1	3	2	3	Good	1.35559	In	35	0.0712034	0.923525
2564	DB16627	1	3	3	3	Good	1.35373	In	21	0.0112552	0.992608
715	DB00869	1	3	3	3	Good	1.35341	In	70	0.101237	0.872781
1506	DB06771	1	3	3	3	Good	1.3518	In	18	0.0270936	0.98255
724	DB00878	1	3	3	3	Good	1.35046	In	21	0.01191	0.992178
371	DB00502	1	3	3	3	Good	1.34659	In	18	0.0402696	0.973604
949	DB01122	1	3	3	3	Good	1.34448	In	21	0.0131085	0.99139
508	DB00648	1	3	3	3	Good	1.34316	In	47	0.0403976	0.962978
1150	DB01403	1	3	2	3	Good	1.34266	In	35	0.0416342	0.969606
1779	DB09281	1	3	3	3	Good	1.34203	In	4	0.119424	0.778175
2006	DB11348	1	3	3	3	Good	1.34203	In	4	0.119424	0.778175
593	DB00737	1	3	3	3	Good	1.33554	In	18	0.0238806	0.984588
854	DB01016	1	3	3	3	Good	1.33537	In	26	0.0415142	0.967812
1539	DB06815	1	3	3	3	Good	1.33333	In	92	0.153419	0.800497
2532	DB15575	1	3	3	3	Good	1.33208	In	46	0.0912138	0.90033
1526	DB06796	1	3	3	3	Good	1.33035	In	70	0.0966556	0.877018
375	DB00508	1	3	2	3	Good	1.32831	In	35	0.0421944	0.967765
631	DB00777	1	3	2	3	Good	1.32831	In	35	0.0421944	0.967765
752	DB00909	1	3	3	3	Good	1.32586	In	57	0.061791	0.928571
754	DB00911	1	3	3	3	Good	1.32543	In	58	0.0399043	0.968237
62	DB00181	1	3	3	3	Good	1.32474	In	123	0	1
958	DB01131	1	3	3	3	Good	1.32474	In	123	0	1
982	DB01156	1	3	3	3	Good	1.32474	In	123	0	1
1890	DB09555	1	3	3	3	Good	1.32474	In	123	8.01e-15	1
1586	DB08881	1	3	3	3	Good	1.3219	In	18	0.0579883	0.943438
1019	DB01194	1	3	3	3	Good	1.31899	In	70	0.0944212	0.879119
992	DB01167	1	3	3	3	Good	1.31879	In	18	0.0971154	0.906592
44	DB00157	1	3	3	3	Good	1.31835	In	46	0.0909381	0.903067
338	DB00469	1	3	3	3	Good	1.31835	In	46	0.0909381	0.903067
2003	DB11342	1	3	3	3	Good	1.31789	In	10	0.0810443	0.817843
2253	DB13249	1	3	3	3	Good	1.31789	In	10	0.0810443	0.817843
403	DB00539	1	3	3	3	Good	1.31561	In	18	0.0407321	0.969592
728	DB00882	1	3	3	3	Good	1.31561	In	18	0.0407321	0.969592
1596	DB08897	1	3	3	3	Good	1.31008	In	42	0.0849581	0.898815
2107	DB11943	1	3	3	3	Good	1.3065	In	18	0.0181431	0.988247
1434	DB06335	1	3	3	3	Good	1.3028	In	46	0.0850429	0.914299
1301	DB04657	1	3	2	3	Good	1.3023	In	2	0.417804	0.499972
229	DB00354	1	3	3	3	Good	1.29348	In	18	0.015571	0.989897
388	DB00524	1	3	3	3	Good	1.29181	In	18	0.0571672	0.946919
600	DB00744	1	3	3	3	Good	1.29138	In	57	0.0596206	0.932981
2285	DB13532	1	3	3	3	Good	1.28126	In	27	0.0519585	0.934065
2442	DB14512	1	3	3	3	Good	1.27875	In	30	0.275286	0.67929
853	DB01015	1	3	3	3	Good	1.27731	In	57	0.0589427	0.934793
749	DB00906	1	3	3	3	Good	1.27512	In	46	0.0907384	0.906196
1664	DB09063	1	3	3	3	Good	1.27453	In	18	0.0569714	0.948929
2565	DB16628	1	3	3	3	Good	1.27398	In	46	0.0589885	0.916117
1971	DB11239	1	3	3	3	Good	1.27206	In	4	0.123032	0.757443
443	DB00580	1	3	3	3	Good	1.27065	In	57	0.0555923	0.946562
1492	DB06736	1	3	3	3	Good	1.2706	In	26	0.0404697	0.971927
936	DB01108	1	3	3	3	Good	1.27031	In	46	0.0778143	0.921008
1486	DB06718	1	3	3	3	Good	1.27031	In	46	0.0778143	0.921008
2514	DB15305	1	3	3	3	Good	1.27031	In	46	0.0778143	0.921008
1065	DB01242	1	3	3	3	Good	1.26996	In	18	0.0109248	0.99289
142	DB00263	1	3	3	3	Good	1.26487	In	57	0.0584489	0.936402
590	DB00734	1	3	3	3	Good	1.26145	In	57	0.0727509	0.950324
1413	DB06215	1	3	3	3	Good	1.24497	In	34	0.11736	0.694605
1086	DB01267	1	3	3	3	Good	1.24325	In	57	0.0691199	0.952686
2201	DB12938	1	3	3	3	Good	1.24056	In	57	0.0516862	0.950443
303	DB00431	1	3	3	3	Good	1.24019	In	4	0.11193	0.753915
1180	DB01574	1	3	3	3	Good	1.24019	In	4	0.11193	0.753915
1774	DB09275	1	3	3	3	Good	1.24019	In	4	0.11193	0.753915
1665	DB09064	1	3	3	3	Good	1.23928	In	68	0.0410701	0.959151
374	DB00507	1	3	3	3	Good	1.23487	In	57	0.0576825	0.940302
2363	DB14033	1	3	3	3	Good	1.23487	In	57	0.0576825	0.940302
2088	DB11817	1	3	3	3	Good	1.23394	In	46	0.0537292	0.924432
1444	DB06480	1	3	3	3	Good	1.22673	In	18	0.002385	0.998439
1070	DB01247	1	3	3	3	Good	1.22537	In	58	0.0581048	0.936744
2472	DB14638	1	3	3	3	Good	1.22488	In	55	0.249713	0.83282
2218	DB13125	1	3	3	3	Good	1.21992	In	26	0.114168	0.901748
943	DB01116	1	3	3	3	Good	1.21904	In	44	0.108324	0.850882
2206	DB12954	1	3	3	3	Good	1.21871	In	57	0.0555923	0.945042
14	DB00118	1	3	3	3	Good	1.21632	In	46	0.0517327	0.928139
2503	DB14881	1	3	3	3	Good	1.21632	In	46	0.0517327	0.928139
1553	DB08439	1	3	3	3	Good	1.21535	In	57	0.0487428	0.953718
1382	DB05812	1	3	3	3	Good	1.21367	In	46	0.0652158	0.93294
1579	DB08871	1	3	3	3	Good	1.21367	In	46	0.0652158	0.93294
2240	DB13216	1	3	3	3	Good	1.21293	In	58	0.0563585	0.938506
1561	DB08815	1	3	3	3	Good	1.21163	In	44	0.106986	0.85208
2127	DB12095	1	3	3	3	Good	1.20714	In	18	0.0014854	0.999026
549	DB00690	1	3	3	3	Good	1.20353	In	18	0.00219916	0.998558
2517	DB15442	1	3	3	3	Good	1.20349	In	46	0.0629509	0.935118
1043	DB01219	1	3	3	3	Good	1.20297	In	57	0.0535007	0.947122
2115	DB11989	1	3	3	3	Good	1.20184	In	58	0.054847	0.94008
1632	DB08973	1	3	2	3	Good	1.19882	In	30	0.276907	0.674624
1163	DB01426	1	3	3	3	Good	1.19826	In	44	0.131754	0.857509
117	DB00238	1	3	3	3	Good	1.19689	In	46	0.0614829	0.936535
2413	DB14202	1	3	3	3	Good	1.19399	In	42	0.0744231	0.93626
1362	DB05154	1	3	3	3	Good	1.17548	In	57	0.0501109	0.950777
2080	DB11761	1	3	2	3	Good	1.17409	In	18	0.346487	0.755865
1207	DB01606	1	3	3	3	Good	1.17101	In	46	0.0477066	0.937808
2237	DB13209	1	3	3	3	Good	1.16961	In	36	0.28793	0.620359
946	DB01119	1	3	3	3	Good	1.16834	In	68	0.0122884	0.987925
2444	DB14517	1	3	3	3	Good	1.16542	In	10	0.0908678	0.759425
2466	DB00873	1	3	3	3	Good	1.16506	In	37	0.149954	0.808923
2411	DB14200	1	3	3	3	Good	1.16332	In	42	0.0673503	0.941966
271	DB00398	1	3	3	3	Good	1.15876	In	18	0.0110436	0.992761
2152	DB12364	1	3	3	3	Good	1.15876	In	18	0.0110436	0.992761
1181	DB01575	1	3	3	3	Good	1.15816	In	34	0.0985984	0.71377
2135	DB12153	1	3	3	3	Good	1.15352	In	79	0.0908523	0.905004
2560	DB16261	1	3	2	3	Good	1.15314	In	35	0.133101	0.886044
2061	DB11691	1	3	3	3	Good	1.14262	In	57	0.130212	0.883781
2099	DB11886	1	3	3	3	Good	1.1426	In	18	0.0900593	0.925741
211	DB00336	1	3	3	3	Good	1.14156	In	58	0	1
1758	DB09220	1	3	3	3	Good	1.14156	In	58	0	1
644	DB00793	1	3	3	3	Good	1.13986	In	69	0.040468	0.963614
1339	DB04876	1	3	3	3	Good	1.13816	In	46	0.0484178	0.949338
1076	DB01254	1	3	2	3	Good	1.13614	In	43	0.245537	0.860969
151	DB00273	1	3	3	3	Good	1.13448	In	46	0.0458371	0.945754
672	DB00822	1	3	3	3	Good	1.13364	In	70	0	1
1613	DB08932	1	3	3	3	Good	1.12715	In	42	0.0498534	0.945008
1347	DB04920	1	3	3	3	Good	1.12303	In	55	0.0833687	0.938749
650	DB00799	1	3	2	3	Good	1.122	In	35	0.250279	0.831244
24	DB00131	1	3	3	3	Good	1.11874	In	46	0.0454579	0.949218
585	DB00728	1	3	3	3	Good	1.11783	In	46	0.0438952	0.953852
1515	DB06783	1	3	3	3	Good	1.1154	In	83	0.126804	0.6592
1290	DB04348	1	3	3	3	Good	1.11381	In	46	0.0453941	0.950308
1584	DB08877	1	3	3	3	Good	1.11299	In	46	0.0428184	0.954933
1711	DB09123	1	3	3	3	Good	1.11299	In	46	0.0428184	0.954933
2539	DB15685	1	3	3	3	Good	1.10358	In	46	0.0407252	0.957041
1356	DB05015	1	3	3	3	Good	1.09481	In	57	0.0407644	0.969698
475	DB00613	1	3	3	3	Good	1.0948	In	18	0.0403402	0.972801
719	DB14596	1	3	3	3	Good	1.09458	In	37	0.142351	0.819593
1079	DB01259	1	3	3	3	Good	1.09457	In	18	0.12863	0.894873
1343	DB04898	1	3	3	3	Good	1.09344	In	57	0.0426672	0.961856
182	DB00305	1	3	3	3	Good	1.09011	In	46	0.0377281	0.960076
1121	DB01339	1	3	3	3	Good	1.09011	In	46	0.0377281	0.960076
2001	DB11336	1	3	3	3	Good	1.09011	In	46	0.0377281	0.960076
2069	DB11730	1	3	3	3	Good	1.09011	In	46	0.0377281	0.960076
2102	DB11921	1	3	3	3	Good	1.09011	In	46	0.0377281	0.960076
1476	DB06708	1	3	3	3	Good	1.0893	In	18	0.180221	0.859948
586	DB00730	1	3	3	3	Good	1.08599	In	52	0.0834941	0.92621
1395	DB06153	1	3	3	3	Good	1.08599	In	52	0.0834941	0.92621
1045	DB01221	1	3	3	3	Good	1.08192	In	23	0.0425406	0.94665
2090	DB11823	1	3	3	3	Good	1.08192	In	23	0.0425406	0.94665
798	DB00958	1	3	3	3	Good	1.07918	In	46	0.0456912	0.946512
1119	DB01337	1	3	3	3	Good	1.07735	In	46	0.0348902	0.962968
1399	DB06176	1	3	3	3	Good	1.07706	In	79	0.0922023	0.889901
1673	DB09073	1	3	3	3	Good	1.07427	In	46	0.0342041	0.96367
926	DB01097	1	3	3	3	Good	1.0699	In	57	0.0414882	0.965082
1662	DB09060	1	3	3	3	Good	1.06855	In	92	0.147722	0.818155
2249	DB13245	1	3	3	3	Good	1.06687	In	70	0.014948	0.984726
2518	DB15444	1	3	3	3	Good	1.06452	In	51	0.0461003	0.943433
1056	DB01233	1	3	3	3	Good	1.06087	In	21	0.0525481	0.951456
731	DB00885	1	3	3	3	Good	1.05944	In	46	0.030905	0.967059
209	DB00334	1	3	3	3	Good	1.05817	In	52	0.0771161	0.93146
763	DB00920	1	3	3	3	Good	1.05817	In	52	0.0771161	0.93146
285	DB00413	1	3	3	3	Good	1.05775	In	51	0.0458609	0.944942
1940	DB11156	1	3	3	3	Good	1.05775	In	51	0.0458609	0.944942
1145	DB01395	1	3	3	3	Good	1.05622	In	10	0.0075113	0.982906
1120	DB01338	1	3	3	3	Good	1.05377	In	46	0.0296435	0.968361
1319	DB04834	1	3	3	3	Good	1.05377	In	46	0.0296435	0.968361
602	DB00746	1	3	3	3	Good	1.05272	In	58	0.0173909	0.985703
459	DB00597	1	3	3	3	Good	1.04819	In	51	0.0456062	0.947078
2501	DB14845	1	3	3	3	Good	1.04528	In	52	0.0741604	0.933913
2089	DB11820	1	3	3	3	Good	1.04501	In	92	0.148396	0.813321
1677	DB09078	1	3	3	3	Good	1.04263	In	18	0.0825575	0.939245
2162	DB12471	1	3	3	3	Good	1.04108	In	46	0.0268203	0.971288
2120	DB12015	1	3	3	3	Good	1.03931	In	51	0.0454575	0.949074
1316	DB04826	1	3	3	3	Good	1.03908	In	52	0.0631629	0.91818
665	DB00814	1	3	3	3	Good	1.03874	In	42	0.0386237	0.965874
1040	DB01216	1	3	3	3	Good	1.03245	In	46	0.0249006	0.973288
1335	DB04864	1	3	3	3	Good	1.03245	In	46	0.0249006	0.973288
2510	DB15091	1	3	3	3	Good	1.03245	In	46	0.0249006	0.973288
193	DB00317	1	3	3	3	Good	1.02961	In	18	0.0820307	0.940735
944	DB01117	1	3	3	3	Good	1.02872	In	23	0.0515107	0.931397
1453	DB06616	1	3	3	3	Good	1.02794	In	18	0.127441	0.901836
466	DB00604	1	3	3	3	Good	1.02682	In	18	0.0417565	0.96723
651	DB00800	1	3	3	3	Good	1.02343	In	18	0.0818078	0.941444
942	DB01115	1	3	3	3	Good	1.02251	In	57	0.0406852	0.969891
148	DB00270	1	3	3	3	Good	1.02035	In	57	0.0246511	0.982596
1595	DB08896	1	3	3	3	Good	1.01957	In	26	0.0415142	0.967812
886	DB01054	1	3	3	3	Good	1.01679	In	57	0.0407359	0.969071
359	DB00490	1	3	3	3	Good	1.01618	In	46	0.0212825	0.97708
2047	DB11637	1	3	3	3	Good	1.01275	In	57	0.0640295	0.939183
1245	DB02546	1	3	3	3	Good	1.00963	In	58	0.0399043	0.968237
2096	DB11853	1	3	3	3	Good	1.00678	In	53	0.0887402	0.903737
274	DB00401	1	3	3	3	Good	1.00662	In	57	0.0409047	0.967612
1480	DB06712	1	3	3	3	Good	1.00662	In	57	0.0409047	0.967612
1793	DB09320	1	3	2	3	Good	1.00648	In	35	0.252489	0.818138
2110	DB11963	1	3	3	3	Good	1.00609	In	18	0.0812769	0.943438
1338	DB04871	1	3	3	3	Good	1.00589	In	23	0	1
2037	DB11611	1	3	2	3	Good	1.00472	In	18	0.217463	0.836547
1329	DB04845	1	3	3	3	Good	1.0028	In	62	0.0454278	0.949798
266	DB00393	1	3	3	3	Good	0.997826	In	57	0.0411307	0.966352
2546	DB15822	1	3	3	3	Good	0.997532	In	46	0.0171334	0.981466
2555	DB16022	1	3	3	3	Good	0.996757	In	62	0.0454079	0.951172
1609	DB08916	1	3	3	3	Good	0.995434	In	18	0.0810207	0.944668
2354	DB13997	1	3	2	3	Good	0.992196	In	35	0.11882	0.890074
2144	DB12300	1	3	3	3	Good	0.991611	In	57	0.0189183	0.986589
1666	DB09065	1	3	3	3	Good	0.988048	In	42	0.0269341	0.975954
904	DB01074	1	3	3	3	Good	0.987141	In	46	0.0148218	0.983926
1216	DB01618	1	3	3	3	Good	0.987141	In	46	0.0148218	0.983926
1173	DB01495	1	3	3	3	Good	0.985327	In	83	0.119059	0.612565
661	DB00810	1	3	3	3	Good	0.981059	In	46	0.0623671	0.911433
115	DB00236	1	3	3	3	Good	0.977329	In	22	0.0940721	0.911043
669	DB00819	1	3	3	3	Good	0.977329	In	22	0.0940721	0.911043
1817	DB09366	1	3	3	3	Good	0.977329	In	22	0.0940721	0.911043
2129	DB12107	1	3	3	3	Good	0.975726	In	79	0.0454972	0.948094
1109	DB01325	1	3	3	3	Good	0.975412	In	27	0.0076413	0.992661
545	DB00686	1	3	3	3	Good	0.975078	In	34	0.0832626	0.772123
1419	DB06234	1	3	2	3	Good	0.974121	In	21	0.246691	0.847414
319	DB00447	1	3	3	3	Good	0.972452	In	52	0.0540807	0.931224
1197	DB01595	1	3	3	3	Good	0.972185	In	57	0.0580062	0.94434
1304	DB04743	1	3	3	3	Good	0.971004	In	53	0.053171	0.949077
1408	DB06209	1	3	3	3	Good	0.970072	In	52	0.056919	0.948486
1567	DB08823	1	3	3	3	Good	0.967943	In	46	0.0105511	0.988504
248	DB00373	1	3	3	3	Good	0.966762	In	79	0.045426	0.950144
331	DB00460	1	3	3	3	Good	0.964336	In	46	0.00974855	0.989369
1948	DB11179	1	3	3	3	Good	0.962382	In	58	0.0350766	0.971163
2074	DB11748	1	3	3	3	Good	0.961567	In	42	0.0479744	0.948224
2515	DB15328	1	3	3	3	Good	0.958177	In	46	0.0589885	0.916117
482	DB00622	1	3	3	3	Good	0.955099	In	57	0.011634	0.99171
2215	DB13114	1	3	3	3	Good	0.954845	In	57	0.0555923	0.946562
858	DB01020	1	3	3	3	Good	0.954647	In	92	0.139323	0.868907
1142	DB01392	1	3	3	3	Good	0.949807	In	44	0.0812926	0.900263
1762	DB09238	1	3	3	3	Good	0.94679	In	57	0.0545092	0.947598
1233	DB01764	1	3	3	3	Good	0.94448	In	79	0.0456288	0.946081
1390	DB06147	1	3	3	3	Good	0.943279	In	42	0.0166104	0.985033
2092	DB11828	1	3	3	3	Good	0.943272	In	18	0.080553	0.94893
251	DB00377	1	3	3	3	Good	0.942858	In	44	0.0951991	0.918141
2060	DB11689	1	3	2	3	Good	0.942021	In	17	0.231983	0.839442
1420	DB06237	1	3	2	3	Good	0.941615	In	43	0.248933	0.836585
119	DB00240	1	3	2	3	Good	0.94102	In	23	0.276283	0.685242
687	DB00838	1	3	2	3	Good	0.94102	In	23	0.276283	0.685242
623	DB00769	1	3	3	3	Good	0.939947	In	46	0.00432302	0.995258
1025	DB01200	1	3	3	3	Good	0.939788	In	44	0.0701747	0.915114
1042	DB01218	1	3	3	3	Good	0.939571	In	18	0.127954	0.897102
2280	DB13381	1	3	3	3	Good	0.937958	In	7	0.0827625	0.76881
565	DB00708	1	3	3	3	Good	0.93611	In	52	0.0504044	0.938496
336	DB00467	1	3	3	3	Good	0.934864	In	46	0.00319238	0.996494
762	DB00919	1	3	3	3	Good	0.934864	In	46	0.00319238	0.996494
1594	DB08895	1	3	3	3	Good	0.934864	In	46	0.00319238	0.996494
2124	DB12035	1	3	3	3	Good	0.934178	In	57	0.052867	0.949224
372	DB00503	1	3	3	3	Good	0.933703	In	42	0.0144023	0.986997
245	DB00370	1	3	3	3	Good	0.933027	In	44	0.0781863	0.903305
439	DB00576	1	3	3	3	Good	0.929209	In	42	0.0133658	0.987921
2195	DB12865	1	3	3	3	Good	0.928159	In	22	0.0947538	0.900314
1066	DB01243	1	3	3	3	Good	0.925897	In	27	0.0474716	0.940808
2496	DB14761	1	3	3	3	Good	0.925813	In	52	0.0495682	0.940577
2122	DB12020	1	3	3	3	Good	0.924982	In	44	0.0767199	0.904771
2319	DB13879	1	3	3	3	Good	0.92113	In	52	0.0456984	0.958217
2405	DB14194	1	3	3	3	Good	0.91902	In	83	0.0860885	0.7299
1365	DB05245	1	3	3	3	Good	0.916762	In	42	0.0104956	0.99049
1013	DB01188	1	3	3	3	Good	0.914779	In	92	0.139619	0.86036
1376	DB05521	1	3	3	3	Good	0.913803	In	46	0.00149284	0.998355
582	DB00725	1	3	3	3	Good	0.913228	In	52	0.0486824	0.943134
525	DB00665	1	3	3	3	Good	0.910942	In	57	0.00282461	0.997975
1554	DB08604	1	3	3	3	Good	0.907864	In	27	0.0919307	0.886197
2274	DB13306	1	3	3	3	Good	0.904469	In	27	0.0454358	0.944502
223	DB00348	1	3	3	3	Good	0.903545	In	57	0.00134907	0.999032
1289	DB04339	1	3	2	3	Good	0.902376	In	2	0.409558	0.540504
1158	DB01418	1	3	3	3	Good	0.899545	In	57	0.0487428	0.953718
1449	DB06603	1	3	3	3	Good	0.899545	In	57	0.0487428	0.953718
729	DB00883	1	3	3	3	Good	0.898745	In	92	0.139904	0.856923
420	DB00557	1	3	2	3	Good	0.896972	In	43	0.249171	0.83151
1849	DB09421	1	3	3	3	Good	0.895303	In	46	0.00560824	0.993819
562	DB00704	1	3	3	3	Good	0.895048	In	66	0.115848	0.872436
1418	DB06230	1	3	3	3	Good	0.895048	In	66	0.115848	0.872436
632	DB00778	1	3	3	3	Good	0.892151	In	58	0.0834399	0.921127
1266	DB03310	1	3	3	3	Good	0.890677	In	70	0.0954512	0.881577
1432	DB06290	1	3	3	3	Good	0.890077	In	80	0.10476	0.875534
612	DB00756	1	3	2	3	Good	0.889305	In	47	0.245395	0.799785
1320	DB04835	1	3	3	3	Good	0.888198	In	46	0.0504711	0.930748
90	DB00209	1	3	3	3	Good	0.880987	In	44	0.0690105	0.912871
1749	DB09195	1	3	3	3	Good	0.880987	In	44	0.0690105	0.912871
382	DB00517	1	3	3	3	Good	0.878712	In	79	0.0492344	0.930202
57	DB00176	1	3	3	3	Good	0.877694	In	57	0.0506115	0.949132
2279	DB13346	1	3	3	3	Good	0.877694	In	57	0.0506115	0.949132
258	DB00384	1	3	3	3	Good	0.876579	In	46	0.0493908	0.933222
335	DB00465	1	3	3	3	Good	0.876579	In	46	0.0493908	0.933222
473	DB00611	1	3	3	3	Good	0.874507	In	44	0.0796377	0.930593
576	DB00719	1	3	3	3	Good	0.874296	In	44	0.0678908	0.914115
747	DB00904	1	3	3	3	Good	0.874296	In	44	0.0678908	0.914115
808	DB00969	1	3	3	3	Good	0.874296	In	44	0.0678908	0.914115
674	DB00824	1	3	3	3	Good	0.873874	In	51	0.00653927	0.992717
1164	DB01427	1	3	3	3	Good	0.873874	In	51	0.00653927	0.992717
2103	DB11932	1	3	3	3	Good	0.873874	In	51	0.00653927	0.992717
1686	DB09087	1	3	3	3	Good	0.872441	In	34	0.0807431	0.809211
947	DB01120	1	3	3	3	Good	0.870609	In	52	0.0341159	0.968473
2513	DB15233	1	3	3	3	Good	0.869063	In	44	0.0670261	0.915091
758	DB00915	1	3	3	3	Good	0.866026	In	10	0.0297862	0.931034
1615	DB08934	1	3	3	3	Good	0.864823	In	52	0.0468017	0.953096
815	DB00976	1	3	3	3	Good	0.864322	In	51	0.00441204	0.995074
1500	DB06764	1	3	3	3	Good	0.861404	In	44	0.0657791	0.916523
392	DB00528	1	3	3	3	Good	0.859678	In	57	0.0448515	0.958945
692	DB00844	1	3	3	3	Good	0.859172	In	66	0.111023	0.877862
1529	DB06800	1	3	3	3	Good	0.859172	In	66	0.111023	0.877862
599	DB00743	1	3	3	3	Good	0.859123	In	52	0.0467489	0.954283
537	DB00678	1	3	2	3	Good	0.856876	In	18	0.245622	0.831949
2404	DB14193	1	3	3	3	Good	0.85685	In	83	0.075538	0.751093
293	DB00421	1	3	3	3	Good	0.856094	In	7	0.0557527	0.806804
106	DB00226	1	3	3	3	Good	0.855436	In	51	0.00243322	0.997277
915	DB01085	1	3	3	3	Good	0.855436	In	51	0.00243322	0.997277
608	DB00752	1	3	3	3	Good	0.855208	In	46	0.0477066	0.937808
1950	DB11181	1	3	3	3	Good	0.855208	In	46	0.0477066	0.937808
417	DB00554	1	3	3	3	Good	0.854869	In	52	0.0305075	0.971714
1568	DB08824	1	3	3	3	Good	0.854869	In	52	0.0305075	0.971714
2398	DB14185	1	3	3	3	Good	0.852947	In	18	0.098954	0.89983
2298	DB13743	1	3	2	3	Good	0.852818	In	83	0.165123	0.570103
1907	DB11090	1	3	3	3	Good	0.852801	In	36	0.147282	0.822086
496	DB00636	1	3	3	3	Good	0.852108	In	48	0.0582901	0.914831
2480	DB14656	1	3	3	3	Good	0.852108	In	48	0.0582901	0.914831
589	DB00733	1	3	3	3	Good	0.851197	In	92	0.141302	0.84673
172	DB00295	1	3	3	3	Good	0.850692	In	66	0.109935	0.879155
203	DB00327	1	3	3	3	Good	0.850692	In	66	0.109935	0.879155
124	DB00245	1	3	3	3	Good	0.849126	In	44	0.0638285	0.918828
734	DB00889	1	3	3	3	Good	0.849126	In	44	0.0638285	0.918828
889	DB01058	1	3	3	3	Good	0.849126	In	44	0.0638285	0.918828
1501	DB06766	1	3	3	3	Good	0.849126	In	44	0.0638285	0.918828
361	DB00492	1	3	3	3	Good	0.848631	In	52	0.0467472	0.954292
676	DB00826	1	3	3	3	Good	0.844509	In	51	0	1
26	DB00134	1	3	2	3	Good	0.839884	In	2	0.409932	0.531299
1252	DB02893	1	3	2	3	Good	0.839884	In	2	0.409932	0.531299
2345	DB13972	1	3	2	3	Good	0.839884	In	2	0.409932	0.531299
114	DB00235	1	3	3	3	Good	0.839402	In	51	0.00113726	0.998724
649	DB00798	1	3	3	3	Good	0.839402	In	51	0.00113726	0.998724
2266	DB13274	1	3	3	3	Good	0.839402	In	51	0.00113726	0.998724
1088	DB01273	1	3	3	3	Good	0.836963	In	66	0.108218	0.881256
390	DB00526	1	3	3	3	Good	0.836511	In	7	0.0531519	0.814545
260	DB00387	1	3	3	3	Good	0.83601	In	46	0.046557	0.941966
783	DB00942	1	3	3	3	Good	0.83601	In	46	0.046557	0.941966
702	DB00854	1	3	3	3	Good	0.835641	In	44	0.070789	0.937826
1140	DB01382	1	3	3	3	Good	0.834828	In	52	0.0469332	0.951272
449	DB00586	1	3	3	3	Good	0.83239	In	27	0.0412196	0.95714
795	DB00955	1	3	3	3	Good	0.832145	In	51	0.00275338	0.996911
2317	DB13874	1	3	3	3	Good	0.832145	In	51	0.00275338	0.996911
1952	DB11183	1	3	3	3	Good	0.828228	In	88	0.121869	0.881647
284	DB00412	1	3	3	3	Good	0.827381	In	52	0.0242055	0.977425
320	DB00448	1	3	3	3	Good	0.827381	In	52	0.0242055	0.977425
956	DB01129	1	3	3	3	Good	0.827381	In	52	0.0242055	0.977425
959	DB01132	1	3	3	3	Good	0.827381	In	52	0.0242055	0.977425
1372	DB05351	1	3	3	3	Good	0.827381	In	52	0.0242055	0.977425
175	DB00298	1	3	3	3	Good	0.826244	In	44	0.0603708	0.923154
684	DB00834	1	3	3	3	Good	0.826244	In	44	0.0603708	0.923154
1576	DB08867	1	3	3	3	Good	0.826244	In	44	0.0603708	0.923154
235	DB00360	1	3	3	3	Good	0.825332	In	62	0.0027727	0.996875
849	DB01011	1	3	3	3	Good	0.825332	In	62	0.0027727	0.996875
2020	DB11575	1	3	3	3	Good	0.820519	In	44	0.0529449	0.936918
1661	DB09059	1	3	3	3	Good	0.819178	In	42	0.0120069	0.989017
250	DB00376	1	3	3	3	Good	0.81867	In	46	0.0458371	0.945754
656	DB00805	1	3	3	3	Good	0.81867	In	46	0.0458371	0.945754
1910	DB11093	1	3	3	3	Good	0.81294	In	34	0.0472929	0.840468
1916	DB11110	1	3	3	3	Good	0.81294	In	34	0.0472929	0.840468
2431	DB14495	1	3	3	3	Good	0.81294	In	34	0.0472929	0.840468
1352	DB04948	1	3	3	3	Good	0.811346	In	42	0.0498534	0.945008
194	DB00318	1	3	3	3	Good	0.810925	In	66	0.105123	0.885268
796	DB00956	1	3	3	3	Good	0.810925	In	66	0.105123	0.885268
1017	DB01192	1	3	3	3	Good	0.810925	In	66	0.105123	0.885268
1176	DB01551	1	3	3	3	Good	0.810925	In	66	0.105123	0.885268
1581	DB08873	1	3	3	3	Good	0.807185	In	62	0.00126974	0.998565
1175	DB01544	1	3	3	3	Good	0.807173	In	53	0.0762867	0.929993
1259	DB03147	1	3	3	3	Good	0.804346	In	80	0.101778	0.888581
2156	DB12404	1	3	3	3	Good	0.804255	In	44	0.0512655	0.939972
825	DB00986	1	3	3	3	Good	0.802931	In	46	0.0454579	0.949218
1519	DB06787	1	3	3	3	Good	0.802931	In	46	0.0454579	0.949218
254	DB00380	1	3	3	3	Good	0.801796	In	62	0.00247022	0.997207
711	DB00864	1	3	3	3	Good	0.801796	In	62	0.00247022	0.997207
2235	DB13179	1	3	3	3	Good	0.801796	In	62	0.00247022	0.997207
380	DB00514	1	3	3	3	Good	0.801094	In	44	0.0629236	0.944349
1217	DB01619	1	3	3	3	Good	0.801094	In	44	0.0629236	0.944349
2505	DB14914	1	3	3	3	Good	0.801094	In	44	0.0629236	0.944349
559	DB00700	1	3	3	3	Good	0.797675	In	10	0.04319	0.9
1177	DB01558	1	3	3	3	Good	0.796584	In	44	0.0505481	0.941419
1389	DB06145	1	3	3	3	Good	0.795051	In	79	0.00333286	0.996216
262	DB00389	1	3	3	3	Good	0.793458	In	79	0.0592176	0.909618
413	DB00550	1	3	3	3	Good	0.793458	In	79	0.0592176	0.909618
461	DB00599	1	3	3	3	Good	0.793458	In	79	0.0592176	0.909618
471	DB00609	1	3	3	3	Good	0.793458	In	79	0.0592176	0.909618
980	DB01154	1	3	3	3	Good	0.793458	In	79	0.0592176	0.909618
1823	DB09377	1	3	3	3	Good	0.793458	In	79	0.0592176	0.909618
2180	DB12667	1	3	3	3	Good	0.793458	In	79	0.0592176	0.909618
1194	DB01591	1	3	3	3	Good	0.793049	In	44	0.0610919	0.945882
657	DB00806	1	3	3	3	Good	0.791854	In	79	0.00262032	0.997023
2438	DB14505	1	3	3	3	Good	0.790415	In	34	0.0565879	0.858193
964	DB01138	1	3	3	3	Good	0.789196	In	44	0.0499054	0.942817
648	DB00797	1	3	3	3	Good	0.78858	In	46	0.0453457	0.952399
764	DB00921	1	3	3	3	Good	0.786622	In	44	0.100964	0.886966
529	DB00670	1	3	3	3	Good	0.7862	In	54	0.0539597	0.948614
625	DB00771	1	3	3	3	Good	0.7862	In	54	0.0539597	0.948614
1983	DB11273	1	3	3	3	Good	0.785221	In	44	0.0593097	0.947377
1587	DB08882	1	3	3	3	Good	0.781659	In	54	0.0529266	0.949548
2065	DB11703	1	3	3	3	Good	0.781659	In	54	0.0529266	0.949548
723	DB00877	1	3	3	3	Good	0.777388	In	79	0.000603	0.999313
257	DB00383	1	3	3	3	Good	0.775442	In	46	0.0454398	0.949331
2123	DB12026	1	3	3	3	Good	0.775213	In	44	0.0488244	0.945475
366	DB00497	1	3	3	3	Good	0.775068	In	44	0.0986354	0.888909
2250	DB13246	1	3	3	3	Good	0.775068	In	44	0.0986354	0.888909
655	DB00804	1	3	3	3	Good	0.774766	In	79	0.00118733	0.998647
746	DB00903	1	3	3	3	Good	0.772113	In	27	0.0331123	0.967962
373	DB00504	1	3	3	3	Good	0.770183	In	44	0.0558861	0.950264
1984	DB11274	1	3	3	3	Good	0.770183	In	44	0.0558861	0.950264
1985	DB11275	1	3	3	3	Good	0.770183	In	44	0.0558861	0.950264
1212	DB01611	1	3	2	3	Good	0.769039	In	55	0.24978	0.831025
1523	DB06792	1	3	3	3	Good	0.768986	In	34	0.0523438	0.867419
1105	DB01319	1	3	3	3	Good	0.768636	In	42	0.0474888	0.953122
2064	DB11700	1	3	3	3	Good	0.768636	In	42	0.0474888	0.953122
581	DB00724	1	3	3	3	Good	0.768581	In	54	0.0499512	0.952249
1645	DB09030	1	3	3	3	Good	0.768581	In	54	0.0499512	0.952249
1751	DB09209	1	3	3	3	Good	0.768316	In	44	0.0972816	0.890048
298	DB00426	1	3	3	3	Good	0.76737	In	79	0.00283542	0.996769
273	DB00400	1	3	3	3	Good	0.767236	In	27	0.0647535	0.899474
898	DB01067	1	3	3	3	Good	0.767154	In	52	0.0103977	0.990176
680	DB00830	1	3	3	3	Good	0.76337	In	46	0.0456912	0.946512
1053	DB01230	1	3	3	3	Good	0.76337	In	46	0.0456912	0.946512
1652	DB09042	1	3	3	3	Good	0.762194	In	44	0.0479863	0.947963
1690	DB09091	1	3	3	3	Good	0.761307	In	7	0.0449096	0.845707
2373	DB14099	1	3	3	3	Good	0.761029	In	79	0.0640939	0.901789
2332	DB13947	1	3	3	3	Good	0.75867	In	54	0.0476965	0.954306
1703	DB09114	1	3	3	3	Good	0.758452	In	79	0.0645004	0.901167
2325	DB13925	1	3	3	3	Good	0.757593	In	80	0.102731	0.885153
2350	DB13985	1	3	3	3	Good	0.757593	In	80	0.102731	0.885153
345	DB00476	1	3	3	3	Good	0.756015	In	44	0.047648	0.949148
618	DB00762	1	3	3	3	Good	0.755916	In	44	0.052638	0.953019
1785	DB09297	1	3	3	3	Good	0.755796	In	44	0.0772718	0.888792
1989	DB11283	1	3	3	3	Good	0.75543	In	79	0.0649802	0.900437
930	DB01101	1	3	3	3	Good	0.754401	In	79	0.00572521	0.993476
2316	DB13873	1	3	3	3	Good	0.753422	In	27	0.040862	0.960464
424	DB00561	1	3	3	3	Good	0.752317	In	54	0.0462511	0.955629
80	DB00199	1	3	3	3	Good	0.751486	In	79	0.00637493	0.992735
563	DB00705	1	3	3	3	Good	0.750042	In	44	0.0473583	0.950297
88	DB00207	1	3	3	3	Good	0.748685	In	79	0.006999	0.992024
409	DB00545	1	3	3	3	Good	0.748685	In	79	0.006999	0.992024
641	DB00790	1	3	3	3	Good	0.748685	In	79	0.006999	0.992024
1035	DB01211	1	3	3	3	Good	0.748685	In	79	0.006999	0.992024
1729	DB09144	1	3	3	3	Good	0.748685	In	79	0.006999	0.992024
368	DB00499	1	3	3	3	Good	0.745761	In	57	0.0301292	0.978352
102	DB00222	1	3	3	3	Good	0.745337	In	52	0.00539588	0.994878
234	DB00359	1	3	3	3	Good	0.745337	In	52	0.00539588	0.994878
736	DB00891	1	3	3	3	Good	0.745337	In	52	0.00539588	0.994878
131	DB00252	1	3	3	3	Good	0.744645	In	54	0.0445058	0.957232
875	DB01041	1	3	3	3	Good	0.744645	In	54	0.0445058	0.957232
833	DB00995	1	3	3	3	Good	0.744209	In	34	0.0418485	0.869517
1008	DB01183	1	3	3	3	Good	0.742574	In	44	0.0921731	0.894417
682	DB00832	1	3	3	3	Good	0.741941	In	51	0.0458609	0.944942
1184	DB01579	1	3	3	3	Good	0.741941	In	51	0.0458609	0.944942
347	DB00478	1	3	3	3	Good	0.741042	In	7	0.052089	0.863378
877	DB01043	1	3	3	3	Good	0.741042	In	7	0.052089	0.863378
2072	DB11738	1	3	3	3	Good	0.741042	In	7	0.052089	0.863378
2008	DB11362	1	3	3	3	Good	0.738928	In	52	0.0039267	0.996267
84	DB00203	1	3	3	3	Good	0.738675	In	44	0.0469111	0.952491
1368	DB05271	1	3	3	3	Good	0.738675	In	44	0.0469111	0.952491
1491	DB06729	1	3	3	3	Good	0.738675	In	44	0.0469111	0.952491
2100	DB11901	1	3	3	3	Good	0.738675	In	44	0.0469111	0.952491
30	DB00138	1	3	3	3	Good	0.737067	In	70	0.0914997	0.900145
987	DB01161	1	3	3	3	Good	0.735767	In	20	0.250341	0.831255
1213	DB01612	1	3	3	3	Good	0.734963	In	58	0.079597	0.934563
2552	DB15950	1	3	3	3	Good	0.734514	In	34	0.0455163	0.882683
2372	DB14096	1	3	3	3	Good	0.734399	In	73	0.0663762	0.888212
874	DB01039	1	3	3	3	Good	0.733057	In	27	0.0410654	0.956514
996	DB01171	1	3	3	3	Good	0.73289	In	52	0.00254229	0.99758
1186	DB01581	1	3	3	3	Good	0.73289	In	52	0.00254229	0.99758
1386	DB06119	1	3	3	3	Good	0.73289	In	52	0.00254229	0.99758
1742	DB09160	1	3	3	3	Good	0.732032	In	83	0.0563124	0.797588
2473	DB14642	1	3	3	3	Good	0.730424	In	42	0.0470496	0.956977
544	DB00685	1	3	3	3	Good	0.729471	In	44	0.0466172	0.958168
1646	DB09031	1	3	3	3	Good	0.728997	In	73	0.0666315	0.886918
5	DB00035	1	3	3	3	Good	0.728356	In	42	0.0470728	0.956558
709	DB00862	1	3	3	3	Good	0.728018	In	44	0.0466187	0.954557
196	DB00320	1	3	3	3	Good	0.725338	In	44	0.0888046	0.897367
555	DB00696	1	3	3	3	Good	0.725338	In	44	0.0888046	0.897367
1801	DB09332	1	3	3	3	Good	0.725334	In	31	0.0650156	0.858781
2048	DB11638	1	3	3	3	Good	0.724262	In	7	0.0487665	0.870968
59	DB00178	1	3	3	3	Good	0.723502	In	51	0.0454575	0.949074
610	DB00754	1	3	3	3	Good	0.723502	In	51	0.0454575	0.949074
653	DB00802	1	3	3	3	Good	0.723502	In	51	0.0454575	0.949074
1122	DB01340	1	3	3	3	Good	0.723502	In	51	0.0454575	0.949074
1366	DB05246	1	3	3	3	Good	0.723502	In	51	0.0454575	0.949074
671	DB00821	1	3	3	3	Good	0.723301	In	27	0.102684	0.854193
1001	DB01176	1	3	3	3	Good	0.723274	In	54	0.0396438	0.961725
1556	DB08799	1	3	3	3	Good	0.723274	In	54	0.0396438	0.961725
2024	DB11584	1	3	3	3	Good	0.723274	In	54	0.0396438	0.961725
2108	DB11951	1	3	3	3	Good	0.723274	In	54	0.0396438	0.961725
761	DB00918	1	3	3	3	Good	0.722936	In	44	0.0465231	0.955545
793	DB00952	1	3	3	3	Good	0.722936	In	44	0.0465231	0.955545
278	DB00405	1	3	3	3	Good	0.721801	In	52	0	1
524	DB00664	1	3	3	3	Good	0.721801	In	52	0	1
601	DB00745	1	3	3	3	Good	0.721801	In	52	0	1
685	DB00835	1	3	3	3	Good	0.721801	In	52	0	1
1187	DB01582	1	3	3	3	Good	0.721801	In	52	0	1
1318	DB04832	1	3	3	3	Good	0.721801	In	52	0	1
1440	DB06413	1	3	3	3	Good	0.721801	In	52	0	1
1544	DB06821	1	3	3	3	Good	0.721801	In	52	0	1
1589	DB08884	1	3	3	3	Good	0.721801	In	52	1.82e-14	1
506	DB00646	1	3	3	3	Good	0.720282	In	79	0.0133279	0.984812
540	DB00681	1	3	3	3	Good	0.720282	In	79	0.0133279	0.984812
2232	DB13167	1	3	3	3	Good	0.720175	In	48	0.0412173	0.957416
2547	DB15873	1	3	3	3	Good	0.719504	In	64	0.102432	0.887254
353	DB00484	1	3	3	3	Good	0.715577	In	44	0.072855	0.895618
384	DB00519	1	3	3	3	Good	0.715215	In	51	0.0453961	0.950942
1351	DB04946	1	3	3	3	Good	0.714497	In	53	0.108684	0.901013
531	DB00672	1	3	3	3	Good	0.713463	In	22	0	1
1101	DB01298	1	3	3	3	Good	0.711859	In	52	0.00227929	0.997825
2488	DB14723	1	3	3	3	Good	0.71127	In	44	0.0424734	0.961744
1612	DB08931	1	3	3	3	Good	0.710255	In	54	0.0366819	0.964483
2519	DB15456	1	3	3	3	Good	0.710255	In	54	0.0366819	0.964483
1246	DB02638	1	3	3	3	Good	0.708897	In	42	0.0475253	0.952623
213	DB00338	1	3	3	3	Good	0.708585	In	44	0.0464082	0.958347
592	DB00736	1	3	3	3	Good	0.708585	In	44	0.0464082	0.958347
1425	DB06267	1	3	3	3	Good	0.708585	In	44	0.0464082	0.958347
2160	DB12457	1	3	3	3	Good	0.707783	In	44	0.0416795	0.962432
396	DB00532	1	3	3	3	Good	0.707469	In	51	0.0454065	0.950325
1169	DB01437	1	3	3	3	Good	0.707469	In	51	0.0454065	0.950325
1170	DB01438	1	3	3	3	Good	0.707469	In	51	0.0454065	0.950325
1769	DB09268	1	3	3	3	Good	0.704332	In	42	0.0966316	0.903794
299	DB00427	1	3	3	3	Good	0.704076	In	54	0.0352763	0.965798
972	DB01146	1	3	3	3	Good	0.704076	In	54	0.0352763	0.965798
2297	DB13720	1	3	3	3	Good	0.704076	In	54	0.0352763	0.965798
607	DB00751	1	3	3	3	Good	0.703708	In	44	0.0846452	0.901096
688	DB00839	1	3	3	3	Good	0.702895	In	52	0.00433439	0.995864
1102	DB01299	1	3	3	3	Good	0.702895	In	52	0.00433439	0.995864
1392	DB06150	1	3	3	3	Good	0.702895	In	52	0.00433439	0.995864
7	DB00067	1	3	3	3	Good	0.7003	In	49	0.12735	0.859545
870	DB01033	1	3	3	3	Good	0.698381	In	7	0.0410043	0.873674
2455	DB14542	1	3	3	3	Good	0.698381	In	7	0.0410043	0.873674
2470	DB14631	1	3	3	3	Good	0.698381	In	7	0.0410043	0.873674
2167	DB12492	1	3	3	3	Good	0.698104	In	54	0.0339175	0.967072
286	DB00414	1	3	3	3	Good	0.694771	In	52	0.00619683	0.994087
337	DB00468	1	3	3	3	Good	0.69431	In	44	0.0386122	0.9651
751	DB00908	1	3	3	3	Good	0.69431	In	44	0.0386122	0.9651
1479	DB06711	1	3	3	3	Good	0.69431	In	44	0.0386122	0.9651
1676	DB09076	1	3	3	3	Good	0.69431	In	44	0.0386122	0.9651
2278	DB13345	1	3	3	3	Good	0.693429	In	44	0.0826981	0.902879
294	DB00422	1	3	3	3	Good	0.693398	In	62	0.0454925	0.948345
999	DB01174	1	3	3	3	Good	0.693398	In	62	0.0454925	0.948345
1162	DB01424	1	3	3	3	Good	0.693398	In	62	0.0454925	0.948345
1469	DB06701	1	3	3	3	Good	0.693398	In	62	0.0454925	0.948345
484	DB00624	1	3	3	3	Good	0.693351	In	7	0.042646	0.885305
1230	DB01708	1	3	3	3	Good	0.693351	In	7	0.042646	0.885305
1465	DB06697	1	3	3	3	Good	0.693351	In	7	0.042646	0.885305
2147	DB12328	1	3	3	3	Good	0.693351	In	7	0.042646	0.885305
2164	DB12474	1	3	3	3	Good	0.693351	In	7	0.042646	0.885305
1084	DB01264	1	3	3	3	Good	0.691312	In	44	0.0465746	0.954818
1901	DB11073	1	3	3	3	Good	0.690905	In	79	0.0198741	0.977352
2311	DB13853	1	3	3	3	Good	0.688991	In	93	0.05856	0.848382
96	DB00216	1	3	3	3	Good	0.688586	In	44	0.0704052	0.900258
1226	DB01632	1	3	3	3	Good	0.688569	In	34	0.0403715	0.894545
2467	DB14598	1	3	3	3	Good	0.688569	In	34	0.0403715	0.894545
830	DB00991	1	3	3	3	Good	0.686737	In	54	0.0313314	0.969506
914	DB01084	1	3	3	3	Good	0.686737	In	54	0.0313314	0.969506
1557	DB08801	1	3	3	3	Good	0.686737	In	54	0.0313314	0.969506
93	DB00213	1	3	3	3	Good	0.683375	In	75	0.0467236	0.95373
325	DB00454	1	3	3	3	Good	0.680951	In	62	0.0454079	0.951172
697	DB00849	1	3	3	3	Good	0.680951	In	62	0.0454079	0.951172
1218	DB01620	1	3	3	3	Good	0.680951	In	62	0.0454079	0.951172
1342	DB04896	1	3	3	3	Good	0.680951	In	62	0.0454079	0.951172
1610	DB08918	1	3	3	3	Good	0.680951	In	62	0.0454079	0.951172
94	DB00214	1	3	3	3	Good	0.680613	In	52	0.00944279	0.99099
1657	DB09053	1	3	3	3	Good	0.678469	In	44	0.0350056	0.968257
2504	DB14895	1	3	3	3	Good	0.678469	In	44	0.0350056	0.968257
1822	DB09376	1	3	3	3	Good	0.678232	In	79	0.0226981	0.974134
165	DB00288	1	3	3	3	Good	0.676318	In	7	0.0392735	0.893408
1839	DB09406	1	3	3	3	Good	0.675285	In	70	0.0934991	0.886012
451	DB00589	1	3	3	3	Good	0.673418	In	44	0.0338556	0.969267
2483	DB14669	1	3	3	3	Good	0.67321	In	7	0.0404237	0.885386
1696	DB09097	1	3	3	3	Good	0.672243	In	75	0.0465268	0.955916
297	DB00425	1	3	3	3	Good	0.670997	In	54	0.0277507	0.972896
663	DB00812	1	3	3	3	Good	0.670997	In	54	0.0277507	0.972896
802	DB00962	1	3	3	3	Good	0.670997	In	54	0.0277507	0.972896
1054	DB01231	1	3	3	3	Good	0.670997	In	54	0.0277507	0.972896
643	DB00792	1	3	3	3	Good	0.669862	In	73	0.0433567	0.953835
1637	DB08988	1	3	3	3	Good	0.669862	In	73	0.0433567	0.953835
1391	DB06148	1	3	3	3	Good	0.66916	In	44	0.0781863	0.907117
139	DB00260	1	3	3	3	Good	0.668929	In	36	0.139724	0.860353
1461	DB06690	1	3	3	3	Good	0.668929	In	36	0.139724	0.860353
2193	DB12834	1	3	3	3	Good	0.668929	In	36	0.139724	0.860353
481	DB00621	1	3	3	3	Good	0.665531	In	7	0.0371375	0.898618
574	DB00717	1	3	3	3	Good	0.665531	In	7	0.0371375	0.898618
738	DB00894	1	3	3	3	Good	0.665531	In	7	0.0371375	0.898618
829	DB00990	1	3	3	3	Good	0.665531	In	7	0.0371375	0.898618
1478	DB06710	1	3	3	3	Good	0.665531	In	7	0.0371375	0.898618
1600	DB08905	1	3	3	3	Good	0.665531	In	7	0.0371375	0.898618
1819	DB09371	1	3	3	3	Good	0.665531	In	7	0.0371375	0.898618
2310	DB13851	1	3	3	3	Good	0.665531	In	7	0.0371375	0.898618
2270	DB13284	1	3	3	3	Good	0.665342	In	42	0.0949552	0.910562
2094	DB11837	1	3	3	3	Good	0.663639	In	44	0.0316291	0.97123
773	DB00932	1	3	3	3	Good	0.661946	In	75	0.0464676	0.957947
1593	DB08893	1	3	3	3	Good	0.661946	In	75	0.0464676	0.957947
227	DB00352	1	3	3	3	Good	0.661843	In	7	0.040361	0.890779
2367	DB14082	1	3	3	3	Good	0.661524	In	73	0.04598	0.951178
1172	DB01452	1	3	3	3	Good	0.661115	In	44	0.0767199	0.908531
2174	DB12543	1	3	3	3	Good	0.661115	In	44	0.0767199	0.908531
241	DB00366	1	3	3	3	Good	0.65992	In	73	0.0411141	0.956118
1090	DB01275	1	3	3	3	Good	0.656647	In	54	0.0244859	0.976009
2084	DB11796	1	3	3	3	Good	0.655449	In	46	0.11179	0.823832
1625	DB08950	1	3	3	3	Good	0.654267	In	44	0.0294954	0.973119
1493	DB06742	1	3	3	3	Good	0.652895	In	42	0.0945939	0.912744
1641	DB09019	1	3	3	3	Good	0.652895	In	42	0.0945939	0.912744
2329	DB13943	1	3	3	3	Good	0.652639	In	7	0.0345848	0.904924
2153	DB12371	1	3	3	3	Good	0.652005	In	53	0.100831	0.908289
818	DB00979	1	3	3	3	Good	0.650956	In	73	0.0390921	0.958186
967	DB01141	1	3	3	3	Good	0.650642	In	117	0.120137	0.899901
2509	DB15035	1	3	3	3	Good	0.649726	In	44	0.0284616	0.974037
629	DB00775	1	3	3	3	Good	0.649722	In	52	0.0165249	0.984232
2275	DB13322	1	3	2	3	Good	0.646879	In	83	0.180091	0.48513
664	DB00813	1	3	3	3	Good	0.643509	In	54	0.021497	0.978875
1327	DB04843	1	3	3	3	Good	0.643509	In	54	0.021497	0.978875
1404	DB06203	1	3	3	3	Good	0.643509	In	54	0.021497	0.978875
596	DB00740	1	3	3	3	Good	0.643507	In	45	0.0464897	0.957786
1311	DB04820	1	3	3	3	Good	0.642833	In	73	0.0372597	0.960068
181	DB00304	1	3	3	3	Good	0.640361	In	7	0.0321537	0.911012
242	DB00367	1	3	3	3	Good	0.640361	In	7	0.0321537	0.911012
252	DB00378	1	3	3	3	Good	0.640361	In	7	0.0321537	0.911012
269	DB00396	1	3	3	3	Good	0.640361	In	7	0.0321537	0.911012
1251	DB02789	1	3	3	3	Good	0.640361	In	7	0.0321537	0.911012
1670	DB09070	1	3	3	3	Good	0.640361	In	7	0.0321537	0.911012
1831	DB09389	1	3	3	3	Good	0.640361	In	7	0.0321537	0.911012
2040	DB11619	1	3	3	3	Good	0.640361	In	7	0.0321537	0.911012
2098	DB11859	1	3	3	3	Good	0.640361	In	7	0.0321537	0.911012
1883	DB09534	1	3	3	3	Good	0.639757	In	135	0.0447428	0.88491
927	DB01098	1	3	3	3	Good	0.638576	In	52	0.0190803	0.981794
533	DB00674	1	3	3	3	Good	0.638249	In	44	0.0726428	0.912573
775	DB00934	1	3	3	3	Good	0.638249	In	44	0.0726428	0.912573
1146	DB01396	1	3	3	3	Good	0.636959	In	7	0.0314802	0.912713
2056	DB11660	1	3	3	3	Good	0.636727	In	36	0.095896	0.886708
836	DB00998	1	3	3	3	Good	0.636647	In	44	0.0254841	0.97669
991	DB01166	1	3	3	3	Good	0.636647	In	44	0.0254841	0.97669
1033	DB01209	1	3	3	3	Good	0.636647	In	44	0.0254841	0.97669
1588	DB08883	1	3	3	3	Good	0.636647	In	44	0.0254841	0.97669
1671	DB09071	1	3	3	3	Good	0.636647	In	44	0.0254841	0.97669
587	DB00731	1	3	3	3	Good	0.635437	In	73	0.0355914	0.961788
352	DB00483	1	3	3	3	Good	0.633257	In	22	0.0731749	0.891831
1324	DB04840	1	3	3	3	Good	0.631436	In	54	0.0187505	0.981524
1866	DB09488	1	3	3	3	Good	0.631436	In	54	0.0187505	0.981524
1154	DB01410	1	3	3	3	Good	0.630951	In	7	0.0302906	0.915734
659	DB00808	1	3	3	3	Good	0.62859	In	80	0.0643157	0.926264
170	DB00293	1	3	3	3	Good	0.627474	In	45	0.0466332	0.954466
263	DB00390	1	3	3	3	Good	0.627025	In	7	0.0295133	0.917719
953	DB01126	1	3	3	3	Good	0.624331	In	44	0.02268	0.979201
35	DB00143	1	3	3	3	Good	0.622949	In	73	0.0755488	0.861518
99	DB00219	1	3	3	3	Good	0.622468	In	73	0.032666	0.964818
158	DB00280	1	3	3	3	Good	0.622468	In	73	0.032666	0.964818
1859	DB09477	1	3	3	3	Good	0.622468	In	73	0.032666	0.964818
431	DB00568	1	3	3	3	Good	0.620384	In	44	0.0217812	0.980009
1067	DB01244	1	3	3	3	Good	0.620305	In	54	0.0162179	0.98398
2142	DB12278	1	3	3	3	Good	0.620305	In	54	0.0162179	0.98398
2013	DB11496	1	3	3	3	Good	0.618386	In	135	0.0432171	0.892431
1689	DB09090	1	3	3	3	Good	0.618109	In	44	0.0663064	0.912604
171	DB00294	1	3	3	3	Good	0.617479	In	7	0.027623	0.922581
1010	DB01185	1	3	3	3	Good	0.617479	In	7	0.027623	0.922581
1439	DB06412	1	3	3	3	Good	0.617479	In	7	0.027623	0.922581
2046	DB11636	1	3	3	3	Good	0.617479	In	7	0.027623	0.922581
893	DB01062	1	3	3	3	Good	0.616752	In	73	0.0313766	0.96616
363	DB00494	1	3	3	3	Good	0.613828	In	53	0	1
349	DB00480	1	3	3	3	Good	0.612712	In	44	0.0200346	0.981582
2143	DB12293	1	3	3	3	Good	0.612712	In	44	0.0200346	0.981582
447	DB00584	1	3	3	3	Good	0.611469	In	73	0.0301851	0.967403
743	DB00899	1	3	3	3	Good	0.611469	In	73	0.0301851	0.967403
306	DB00434	1	3	3	3	Good	0.61043	In	44	0.0678908	0.91754
1437	DB06403	1	3	3	3	Good	0.610008	In	54	0.0138753	0.986262
2204	DB12945	1	3	3	3	Good	0.610008	In	54	0.0138753	0.986262
9	DB00091	1	3	3	3	Good	0.609586	In	79	0.0379946	0.956702
79	DB00198	1	3	3	3	Good	0.609586	In	79	0.0379946	0.956702
179	DB00302	1	3	3	3	Good	0.609586	In	79	0.0379946	0.956702
188	DB00312	1	3	3	3	Good	0.609586	In	79	0.0379946	0.956702
290	DB00418	1	3	3	3	Good	0.609586	In	79	0.0379946	0.956702
343	DB00474	1	3	3	3	Good	0.609586	In	79	0.0379946	0.956702
568	DB00711	1	3	3	3	Good	0.609586	In	79	0.0379946	0.956702
654	DB00803	1	3	3	3	Good	0.609586	In	79	0.0379946	0.956702
699	DB00851	1	3	3	3	Good	0.609586	In	79	0.0379946	0.956702
868	DB01031	1	3	3	3	Good	0.609586	In	79	0.0379946	0.956702
913	DB01083	1	3	3	3	Good	0.609586	In	79	0.0379946	0.956702
995	DB01170	1	3	3	3	Good	0.609586	In	79	0.0379946	0.956702
1126	DB01351	1	3	3	3	Good	0.609586	In	79	0.0379946	0.956702
1127	DB01353	1	3	3	3	Good	0.609586	In	79	0.0379946	0.956702
1378	DB05541	1	3	3	3	Good	0.609586	In	79	0.0379946	0.956702
1452	DB06614	1	3	3	3	Good	0.609586	In	79	0.0379946	0.956702
1466	DB06698	1	3	3	3	Good	0.609586	In	79	0.0379946	0.956702
1482	DB06714	1	3	3	3	Good	0.609586	In	79	0.0379946	0.956702
1499	DB06762	1	3	3	3	Good	0.609586	In	79	0.0379946	0.956702
1580	DB08872	1	3	3	3	Good	0.609586	In	79	0.0379946	0.956702
1628	DB08965	1	3	3	3	Good	0.609586	In	79	0.0379946	0.956702
2062	DB11693	1	3	3	3	Good	0.609586	In	79	0.0379946	0.956702
2498	DB14783	1	3	3	3	Good	0.609586	In	79	0.0379946	0.956702
2499	DB14805	1	3	3	3	Good	0.609586	In	79	0.0379946	0.956702
377	DB00511	1	3	3	3	Good	0.608297	In	7	0.0258049	0.927306
156	DB00278	1	3	3	3	Good	0.606995	In	52	0.0468973	0.95389
560	DB00701	1	3	3	3	Good	0.606995	In	52	0.0468973	0.95389
69	DB00188	1	3	3	3	Good	0.606574	In	73	0.0290807	0.968558
2076	DB11751	1	3	3	3	Good	0.605324	In	44	0.0183527	0.983102
579	DB00722	1	3	3	3	Good	0.602023	In	73	0.0280544	0.969634
2165	DB12480	1	3	3	3	Good	0.601637	In	7	0.0244863	0.930763
748	DB00905	1	3	3	3	Good	0.597783	In	73	0.027098	0.970639
2284	DB13520	1	3	3	3	Good	0.597537	In	44	0.0657791	0.91986
132	DB00253	1	3	3	3	Good	0.596586	In	7	0.0234862	0.933403
1160	DB01420	1	3	3	3	Good	0.596586	In	7	0.0234862	0.933403
1712	DB09124	1	3	3	3	Good	0.596586	In	7	0.0234862	0.933403
1775	DB09276	1	3	3	3	Good	0.594242	In	83	0.0488552	0.865287
2021	DB11577	1	3	3	3	Good	0.592327	In	80	0.0489029	0.950876
308	DB00436	1	3	3	3	Good	0.592248	In	80	0.0652218	0.919914
2025	DB11585	1	3	3	3	Good	0.59216	In	64	0.0918442	0.921551
39	DB00150	1	3	3	3	Good	0.591569	In	54	0.00968047	0.990375
2238	DB13211	1	3	3	3	Good	0.591569	In	54	0.00968047	0.990375
794	DB00953	1	3	3	3	Good	0.591341	In	44	0.0151691	0.985993
820	DB00981	1	3	3	3	Good	0.591341	In	44	0.0151691	0.985993
1605	DB08910	1	3	3	3	Good	0.591341	In	44	0.0151691	0.985993
1611	DB08930	1	3	3	3	Good	0.591341	In	44	0.0151691	0.985993
1803	DB09335	1	3	3	3	Good	0.591341	In	44	0.0151691	0.985993
2131	DB12130	1	3	3	3	Good	0.591341	In	44	0.0151691	0.985993
2132	DB12141	1	3	3	3	Good	0.591341	In	44	0.0151691	0.985993
2407	DB14196	1	3	3	3	Good	0.591341	In	44	0.0151691	0.985993
2000	DB11332	1	3	3	3	Good	0.589411	In	79	0.0424901	0.951579
1516	DB06784	1	3	3	3	Good	0.585114	In	7	0.0431257	0.849666
1975	DB11255	1	3	3	3	Good	0.585114	In	7	0.0431257	0.849666
2360	DB14018	1	3	3	3	Good	0.585114	In	7	0.0431257	0.849666
2449	DB14529	1	3	3	3	Good	0.585114	In	7	0.0431257	0.849666
2535	DB15598	1	3	3	3	Good	0.585114	In	7	0.0431257	0.849666
882	DB01048	1	3	2	3	Good	0.58443	In	46	0.2775	0.735259
502	DB00642	1	3	3	3	Good	0.583282	In	54	0.00779514	0.992235
2531	DB15569	1	3	3	3	Good	0.581492	In	44	0.0129267	0.988039
528	DB00669	1	3	3	3	Good	0.579925	In	52	0.0467881	0.95523
1060	DB01237	1	3	3	3	Good	0.579925	In	52	0.0467881	0.95523
2313	DB13858	1	3	3	3	Good	0.579925	In	52	0.0467881	0.95523
867	DB01030	1	3	3	3	Good	0.579337	In	44	0.0629104	0.923156
1658	DB09054	1	3	3	3	Good	0.579337	In	44	0.0629104	0.923156
934	DB01106	1	3	3	3	Good	0.578322	In	44	0.012205	0.988699
1640	DB09015	1	3	3	3	Good	0.577435	In	7	0.0196941	0.943548
2479	DB14655	1	3	3	3	Good	0.577435	In	7	0.0196941	0.943548
1718	DB09132	1	3	3	3	Good	0.575562	In	7	0.0438278	0.844547
45	DB00158	1	3	3	3	Good	0.575535	In	54	0.00603276	0.99398
1541	DB06817	1	3	3	3	Good	0.575535	In	54	0.00603276	0.99398
2293	DB13680	1	3	3	3	Good	0.575535	In	54	0.00603276	0.99398
2403	DB14191	1	3	3	3	Good	0.575535	In	54	0.00603276	0.99398
85	DB00204	1	3	3	3	Good	0.573967	In	42	0.094325	0.914323
881	DB01047	1	3	3	3	Good	0.572894	In	7	0.018795	0.945986
2454	DB14541	1	3	3	3	Good	0.572894	In	7	0.018795	0.945986
191	DB00315	1	3	3	3	Good	0.572143	In	44	0.0107983	0.989988
512	DB00652	1	3	3	3	Good	0.572143	In	44	0.0107983	0.989988
2283	DB13501	1	3	3	3	Good	0.572143	In	44	0.0107983	0.989988
577	DB00720	1	3	3	3	Good	0.570397	In	83	0.0442023	0.876532
426	DB00563	1	3	3	3	Good	0.568278	In	54	0.00438169	0.995621
1976	DB11256	1	3	3	3	Good	0.568278	In	54	0.00438169	0.995621
2169	DB12500	1	3	3	3	Good	0.567768	In	44	0.0656623	0.918283
1722	DB09136	1	3	3	3	Good	0.566991	In	80	0.0664282	0.915501
1796	DB09324	1	3	3	3	Good	0.566675	In	7	0.0445432	0.839786
133	DB00254	1	3	3	3	Good	0.56617	In	44	0.00943854	0.991238
615	DB00759	1	3	3	3	Good	0.56617	In	44	0.00943854	0.991238
772	DB00931	1	3	3	3	Good	0.56617	In	44	0.00943854	0.991238
1174	DB01501	1	3	3	3	Good	0.56617	In	44	0.00943854	0.991238
1387	DB06137	1	3	3	3	Good	0.56617	In	44	0.00943854	0.991238
401	DB00537	1	3	3	3	Good	0.562377	In	44	0.0603708	0.926248
866	DB01029	1	3	3	3	Good	0.562377	In	44	0.0603708	0.926248
1305	DB04794	1	3	3	3	Good	0.562377	In	44	0.0603708	0.926248
2085	DB11799	1	3	3	3	Good	0.562377	In	44	0.0603708	0.926248
2170	DB12523	1	3	3	3	Good	0.562377	In	44	0.0603708	0.926248
2197	DB12877	1	3	3	3	Good	0.562377	In	44	0.0603708	0.926248
232	DB00357	1	3	3	3	Good	0.561465	In	54	0.0028317	0.997165
510	DB00650	1	3	3	3	Good	0.561465	In	54	0.0028317	0.997165
1748	DB09185	1	3	3	3	Good	0.561465	In	54	0.0028317	0.997165
2033	DB11596	1	3	3	3	Good	0.561465	In	54	0.0028317	0.997165
300	DB00428	1	3	2	3	Good	0.560009	In	58	0.239426	0.835539
200	DB00324	1	3	3	3	Good	0.559816	In	7	0.0162055	0.953079
740	DB00896	1	3	3	3	Good	0.559816	In	7	0.0162055	0.953079
1512	DB06780	1	3	3	3	Good	0.559816	In	7	0.0162055	0.953079
1773	DB09274	1	3	3	3	Good	0.559816	In	7	0.0162055	0.953079
2210	DB13063	1	3	3	3	Good	0.559816	In	7	0.0162055	0.953079
2348	DB13981	1	3	3	3	Good	0.559816	In	7	0.0162055	0.953079
2465	DB14583	1	3	3	3	Good	0.559816	In	7	0.0162055	0.953079
2446	DB14520	1	3	3	3	Good	0.559673	In	83	0.0421099	0.881686
1591	DB08889	1	3	3	3	Good	0.55715	In	54	0.00185005	0.998146
264	DB00391	1	3	3	3	Good	0.555442	In	52	0.0473944	0.950102
1537	DB06813	1	3	3	3	Good	0.555056	In	54	0.0013738	0.998623
77	DB00196	1	3	3	3	Good	0.554803	In	44	0.00685055	0.993625
127	DB00248	1	3	3	3	Good	0.554803	In	44	0.00685055	0.993625
457	DB00595	1	3	3	3	Good	0.554803	In	44	0.00685055	0.993625
667	DB00817	1	3	3	3	Good	0.554803	In	44	0.00685055	0.993625
351	DB00482	1	3	3	3	Good	0.551442	In	44	0.0658817	0.91508
2055	DB11656	1	3	3	3	Good	0.551442	In	44	0.0658817	0.91508
2155	DB12401	1	3	3	3	Good	0.551442	In	44	0.0658817	0.91508
613	DB00757	1	3	3	3	Good	0.549401	In	86	0.126963	0.882538
712	DB00865	1	3	3	3	Good	0.549018	In	54	0	1
1534	DB06809	1	3	3	3	Good	0.549018	In	54	1.8e-14	1
2265	DB13273	1	3	3	3	Good	0.548679	In	52	0.047677	0.948686
104	DB00224	1	3	3	3	Good	0.546748	In	44	0.00501655	0.995324
1540	DB06816	1	3	3	3	Good	0.544357	In	44	0.0578329	0.929556
1606	DB08911	1	3	3	3	Good	0.544336	In	80	0.0492356	0.948419
911	DB01081	1	3	3	3	Good	0.544146	In	44	0.00442431	0.995874
1763	DB09241	1	3	3	3	Good	0.544087	In	80	0.046016	0.958844
226	DB00351	1	3	3	3	Good	0.543552	In	7	0.0129852	0.962049
465	DB00603	1	3	3	3	Good	0.543552	In	7	0.0129852	0.962049
673	DB00823	1	3	3	3	Good	0.543552	In	7	0.0129852	0.962049
1189	DB01586	1	3	3	3	Good	0.543552	In	7	0.0129852	0.962049
1271	DB03619	1	3	3	3	Good	0.543552	In	7	0.0129852	0.962049
1293	DB04540	1	3	3	3	Good	0.543552	In	7	0.0129852	0.962049
1510	DB06777	1	3	3	3	Good	0.543552	In	7	0.0129852	0.962049
1495	DB06753	1	3	3	3	Good	0.54208	In	83	0.038677	0.890272
113	DB00234	1	3	3	3	Good	0.539064	In	44	0.00326719	0.99695
1683	DB09084	1	3	3	3	Good	0.539064	In	44	0.00326719	0.99695
74	DB00193	1	3	3	3	Good	0.537929	In	54	0.00252279	0.997467
369	DB00500	1	3	3	3	Good	0.537929	In	54	0.00252279	0.997467
905	DB01075	1	3	3	3	Good	0.537929	In	54	0.00252279	0.997467
1468	DB06700	1	3	3	3	Good	0.537929	In	54	0.00252279	0.997467
2242	DB13219	1	3	3	3	Good	0.537929	In	54	0.00252279	0.997467
1987	DB11279	1	3	3	3	Good	0.536089	In	44	0.00258984	0.99758
1629	DB08966	1	3	2	3	Good	0.534876	In	79	0.287357	0.701526
199	DB00323	1	3	3	3	Good	0.532229	In	53	0.0887468	0.922568
1285	DB04209	1	3	3	3	Good	0.531705	In	44	0.0561616	0.931893
1450	DB06605	1	3	3	3	Good	0.531705	In	44	0.0561616	0.931893
185	DB00308	1	3	3	3	Good	0.529591	In	52	0.0440663	0.957952
358	DB00489	1	3	3	3	Good	0.529591	In	52	0.0440663	0.957952
951	DB01124	1	3	3	3	Good	0.529591	In	52	0.0440663	0.957952
1472	DB06704	1	3	3	3	Good	0.529591	In	52	0.0440663	0.957952
1525	DB06795	1	3	3	3	Good	0.529591	In	52	0.0440663	0.957952
1861	DB09480	1	3	3	3	Good	0.529591	In	52	0.0440663	0.957952
2556	DB16024	1	3	3	3	Good	0.528596	In	94	0.0453976	0.961268
1139	DB01380	1	3	3	3	Good	0.528492	In	7	0.0100034	0.970507
1247	DB02659	1	3	3	3	Good	0.528492	In	7	0.0100034	0.970507
1281	DB04038	1	3	3	3	Good	0.528492	In	7	0.0100034	0.970507
2041	DB11622	1	3	3	3	Good	0.528492	In	7	0.0100034	0.970507
2301	DB13751	1	3	3	3	Good	0.528492	In	7	0.0100034	0.970507
2330	DB13944	1	3	3	3	Good	0.528492	In	7	0.0100034	0.970507
2452	DB14539	1	3	3	3	Good	0.528492	In	7	0.0100034	0.970507
2476	DB14646	1	3	3	3	Good	0.528492	In	7	0.0100034	0.970507
2530	DB15566	1	3	3	3	Good	0.528492	In	7	0.0100034	0.970507
2563	DB16625	1	3	3	3	Good	0.528492	In	7	0.0100034	0.970507
163	DB00285	1	3	3	3	Good	0.527987	In	54	0.0047846	0.995197
2184	DB12728	1	3	3	3	Good	0.527987	In	54	0.0047846	0.995197
2557	DB16098	1	3	3	3	Good	0.526035	In	44	0.0554448	0.932944
463	DB00601	1	3	3	3	Good	0.524713	In	44	0	1
1268	DB03585	1	3	3	3	Good	0.524713	In	44	0	1
41	DB00152	1	3	2	3	Good	0.522833	In	46	0.275827	0.740819
2383	DB14143	1	3	3	3	Good	0.520749	In	73	0.0501569	0.926303
823	DB00984	1	3	3	3	Good	0.520705	In	132	0.0459645	0.887324
2492	DB00781	1	3	3	3	Good	0.519437	In	73	0.00942538	0.989588
505	DB00645	1	3	3	3	Good	0.519023	In	54	0.00682394	0.993149
765	DB00922	1	3	3	3	Good	0.519023	In	54	0.00682394	0.993149
1129	DB01359	1	3	3	3	Good	0.519023	In	54	0.00682394	0.993149
1215	DB01616	1	3	3	3	Good	0.519023	In	54	0.00682394	0.993149
1462	DB06691	1	3	3	3	Good	0.519023	In	54	0.00682394	0.993149
1807	DB09345	1	3	3	3	Good	0.519023	In	54	0.00682394	0.993149
1970	DB11235	1	3	3	3	Good	0.519023	In	54	0.00682394	0.993149
1055	DB01232	1	3	3	3	Good	0.518003	In	44	0.00152782	0.998569
2166	DB12483	1	3	3	3	Good	0.517792	In	44	0.0544407	0.934476
1887	DB09546	1	3	3	3	Good	0.514686	In	12	0.107469	0.863165
54	DB00173	1	3	3	3	Good	0.514509	In	7	0.00723458	0.978495
309	DB00437	1	3	3	3	Good	0.514509	In	7	0.00723458	0.978495
1240	DB02300	1	3	3	3	Good	0.514509	In	7	0.00723458	0.978495
1383	DB05990	1	3	3	3	Good	0.514509	In	7	0.00723458	0.978495
1837	DB09401	1	3	3	3	Good	0.514509	In	7	0.00723458	0.978495
2272	DB13288	1	3	3	3	Good	0.514509	In	7	0.00723458	0.978495
2485	DB14677	1	3	3	3	Good	0.514509	In	7	0.00723458	0.978495
1681	DB09082	1	3	2	3	Good	0.511789	In	26	0.249043	0.816944
445	DB00582	1	3	3	3	Good	0.511576	In	44	0.00299109	0.997199
1315	DB04825	1	3	3	3	Good	0.511576	In	44	0.00299109	0.997199
1415	DB06217	1	3	3	3	Good	0.511576	In	44	0.00299109	0.997199
1650	DB09040	1	3	3	3	Good	0.511576	In	44	0.00299109	0.997199
2506	DB14975	1	3	3	3	Good	0.511576	In	44	0.00299109	0.997199
76	DB00195	1	3	3	3	Good	0.510899	In	54	0.00867209	0.991294
1811	DB09351	1	3	3	3	Good	0.510899	In	54	0.00867209	0.991294
2035	DB11609	1	3	3	3	Good	0.510899	In	54	0.00867209	0.991294
1786	DB09299	1	3	3	3	Good	0.510302	In	52	0.104729	0.871864
1094	DB01283	1	3	3	3	Good	0.506643	In	27	0.0914343	0.887357
1396	DB06154	1	3	3	3	Good	0.50629	In	36	0.144581	0.823213
1607	DB08912	1	3	3	3	Good	0.506079	In	80	0.0454351	0.963524
2414	DB14203	1	3	2	3	Good	0.505865	In	91	0.224443	0.835493
427	DB00564	1	3	3	3	Good	0.504714	In	44	0.0529449	0.936918
1312	DB04821	1	3	3	3	Good	0.504714	In	44	0.0529449	0.936918
2200	DB12924	1	3	3	3	Good	0.504714	In	44	0.0529449	0.936918
51	DB00166	1	3	3	3	Good	0.504697	In	34	0	1
272	DB00399	1	3	3	3	Good	0.504697	In	34	0	1
513	DB00653	1	3	3	3	Good	0.504697	In	34	7.85e-15	1
642	DB00791	1	3	3	3	Good	0.504697	In	34	0	1
730	DB00884	1	3	3	3	Good	0.504697	In	34	0	1
1511	DB06778	1	3	3	3	Good	0.504697	In	34	7.85e-15	1
1795	DB09322	1	3	3	3	Good	0.504697	In	34	7.85e-15	1
1936	DB11150	1	3	3	3	Good	0.504697	In	34	7.85e-15	1
2256	DB13257	1	3	3	3	Good	0.504697	In	34	7.85e-15	1
2394	DB14180	1	3	3	3	Good	0.504697	In	34	7.85e-15	1
2395	DB14182	1	3	3	3	Good	0.504697	In	34	0	1
2408	DB14197	1	3	3	3	Good	0.504697	In	34	0	1
2450	DB14530	1	3	3	3	Good	0.504697	In	34	7.85e-15	1
464	DB00602	1	3	3	3	Good	0.50466	In	7	0.00528439	0.9842
208	DB00333	1	3	3	3	Good	0.503503	In	54	0.0103547	0.989605
1660	DB09056	1	3	3	3	Good	0.503503	In	54	0.0103547	0.989605
2544	DB15795	1	3	3	3	Good	0.503503	In	54	0.0103547	0.989605
1264	DB03247	1	3	3	3	Good	0.503287	In	45	0.0657735	0.917345
1622	DB08946	1	3	3	3	Good	0.501534	In	64	0.109064	0.864109
1802	DB09333	1	3	3	3	Good	0.501534	In	64	0.109064	0.864109
1804	DB09340	1	3	3	3	Good	0.501534	In	64	0.109064	0.864109
1838	DB09403	1	3	3	3	Good	0.501534	In	64	0.109064	0.864109
1521	DB06789	1	3	3	3	Good	0.50149	In	7	0.00465674	0.986051
1558	DB08804	1	3	3	3	Good	0.50149	In	7	0.00465674	0.986051
2477	DB14649	1	3	3	3	Good	0.50149	In	7	0.00465674	0.986051
2481	DB14657	1	3	3	3	Good	0.50149	In	7	0.00465674	0.986051
2460	DB14554	1	3	3	3	Good	0.499931	In	64	0.064506	0.925339
1961	DB11205	1	3	3	3	Good	0.499791	In	96	0.0530543	0.782364
233	DB00358	1	3	3	3	Good	0.499503	In	75	0.00488494	0.995406
756	DB00913	1	3	3	3	Good	0.499503	In	75	0.00488494	0.995406
1714	DB09128	1	3	3	3	Good	0.499342	In	80	0.0383729	0.969745
1214	DB01613	1	3	3	3	Good	0.49842	In	36	0.145054	0.821416
2045	DB11633	1	3	3	3	Good	0.498327	In	80	0.0462565	0.956269
2271	DB13286	1	3	3	3	Good	0.496741	In	54	0.0118932	0.988061
2303	DB13781	1	3	3	3	Good	0.496741	In	54	0.0118932	0.988061
2105	DB11938	1	3	3	3	Good	0.493573	In	54	0.0126139	0.987337
2118	DB12001	1	3	3	3	Good	0.492398	In	44	0.0516537	0.939229
2512	DB15133	1	3	3	3	Good	0.492398	In	44	0.0516537	0.939229
391	DB00527	1	3	3	3	Good	0.490535	In	54	0.0133051	0.986643
507	DB00647	1	3	3	3	Good	0.490535	In	54	0.0133051	0.986643
322	DB00450	1	3	3	3	Good	0.48845	In	44	0.0512655	0.939972
328	DB00457	1	3	3	3	Good	0.48845	In	44	0.0512655	0.939972
988	DB01162	1	3	3	3	Good	0.48845	In	44	0.0512655	0.939972
1344	DB04908	1	3	3	3	Good	0.48845	In	44	0.0512655	0.939972
2112	DB11978	1	3	3	3	Good	0.48845	In	44	0.0512655	0.939972
2196	DB12867	1	3	3	3	Good	0.48845	In	44	0.0512655	0.939972
385	DB00520	1	3	3	3	Good	0.486673	In	54	0.0141837	0.985761
98	DB00218	1	3	3	3	Good	0.485187	In	66	0.0464688	0.953205
1385	DB06077	1	3	3	3	Good	0.485187	In	66	0.0464688	0.953205
1653	DB09047	1	3	3	3	Good	0.485187	In	66	0.0464688	0.953205
1946	DB11171	1	3	3	3	Good	0.484878	In	83	0.0406438	0.863858
1050	DB01227	1	3	3	3	Good	0.484818	In	54	0.0146056	0.985338
1222	DB01625	1	3	3	3	Good	0.484818	In	54	0.0146056	0.985338
1733	DB09149	1	3	3	3	Good	0.484818	In	54	0.0146056	0.985338
1647	DB09034	1	3	3	3	Good	0.482382	In	80	0.0345938	0.972643
129	DB00250	1	3	3	3	Good	0.48147	In	45	0.0661038	0.91301
630	DB00776	1	3	3	3	Good	0.480778	In	44	0.0505481	0.941419
819	DB00980	1	3	3	3	Good	0.480778	In	44	0.0505481	0.941419
2464	DB14575	1	3	3	3	Good	0.480778	In	44	0.0505481	0.941419
1884	DB09535	1	3	3	3	Good	0.479536	In	54	0.0158074	0.984131
2078	DB11757	1	3	3	3	Good	0.478074	In	75	0	1
2558	DB16165	1	3	3	3	Good	0.478074	In	75	0	1
1232	DB01744	1	3	3	3	Good	0.477971	In	7	0	1
2331	DB13946	1	3	3	3	Good	0.477971	In	7	7.8e-15	1
2386	DB14156	1	3	3	3	Good	0.477971	In	7	0	1
2458	DB14545	1	3	3	3	Good	0.477971	In	7	7.8e-15	1
2471	DB14632	1	3	3	3	Good	0.477971	In	7	7.8e-15	1
744	DB00900	1	3	2	3	Good	0.477886	In	46	0.273824	0.749658
16	DB00120	1	3	3	3	Good	0.477652	In	73	0	1
63	DB00182	1	3	3	3	Good	0.477652	In	73	0	1
72	DB00191	1	3	3	3	Good	0.477652	In	73	0	1
97	DB00217	1	3	3	3	Good	0.477652	In	73	0	1
270	DB00397	1	3	3	3	Good	0.477652	In	73	0	1
634	DB00780	1	3	3	3	Good	0.477652	In	73	0	1
700	DB00852	1	3	3	3	Good	0.477652	In	73	0	1
757	DB00914	1	3	3	3	Good	0.477652	In	73	0	1
778	DB00937	1	3	3	3	Good	0.477652	In	73	0	1
790	DB00949	1	3	3	3	Good	0.477652	In	73	0	1
873	DB01037	1	3	3	3	Good	0.477652	In	73	0	1
948	DB01121	1	3	3	3	Good	0.477652	In	73	0	1
1077	DB01255	1	3	3	3	Good	0.477652	In	73	0	1
1131	DB01364	1	3	3	3	Good	0.477652	In	73	0	1
1132	DB01365	1	3	3	3	Good	0.477652	In	73	0	1
1182	DB01576	1	3	3	3	Good	0.477652	In	73	0	1
1183	DB01577	1	3	3	3	Good	0.477652	In	73	0	1
1416	DB06218	1	3	3	3	Good	0.477652	In	73	0	1
1621	DB08944	1	3	3	3	Good	0.477652	In	73	0	1
1894	DB09571	1	3	3	3	Good	0.477652	In	73	0	1
1986	DB11278	1	3	3	3	Good	0.477652	In	73	0	1
2023	DB11583	1	3	3	3	Good	0.477652	In	73	8.94e-15	1
2027	DB11587	1	3	3	3	Good	0.477652	In	73	0	1
2032	DB11594	1	3	3	3	Good	0.477652	In	73	0	1
2493	DB14752	1	3	3	3	Good	0.477652	In	73	0	1
2495	DB14754	1	3	3	3	Good	0.477652	In	73	0	1
1713	DB09125	1	3	3	3	Good	0.477138	In	96	0.0502523	0.792659
1737	DB09154	1	3	3	3	Good	0.477138	In	96	0.0502523	0.792659
389	DB00525	1	3	3	3	Good	0.474808	In	80	0.045557	0.960332
2500	DB14840	1	3	3	3	Good	0.474808	In	80	0.045557	0.960332
333	DB00462	1	3	2	3	Good	0.474432	In	46	0.280147	0.704067
1087	DB01268	1	3	3	3	Good	0.468522	In	45	0.00202666	0.998082
1649	DB09039	1	3	3	3	Good	0.468522	In	45	0.00202666	0.998082
2474	DB14643	1	3	3	3	Good	0.467314	In	7	0.00211009	0.99359
2475	DB14644	1	3	3	3	Good	0.467314	In	7	0.00211009	0.99359
1455	DB06636	1	3	3	3	Good	0.464151	In	80	0.0454359	0.962184
1310	DB04817	1	3	3	3	Good	0.461047	In	52	0.104587	0.873381
1286	DB04221	1	3	3	3	Good	0.46069	In	73	0.0569403	0.91118
493	DB00633	1	3	3	3	Good	0.459635	In	45	0	1
219	DB00344	1	3	3	3	Good	0.459407	In	44	0.0488244	0.945475
404	DB00540	1	3	3	3	Good	0.459407	In	44	0.0488244	0.945475
977	DB01151	1	3	3	3	Good	0.459407	In	44	0.0488244	0.945475
957	DB01130	1	3	3	3	Good	0.457303	In	7	0.00409229	0.987568
2456	DB14543	1	3	3	3	Good	0.457303	In	7	0.00409229	0.987568
1003	DB01178	1	3	3	3	Good	0.456576	In	93	0.0436594	0.895745
311	DB00439	1	3	3	3	Good	0.454704	In	54	0.0214567	0.97846
1760	DB09236	1	3	3	3	Good	0.454704	In	54	0.0214567	0.97846
2151	DB12362	1	3	3	3	Good	0.454122	In	73	0.0578267	0.909526
2194	DB12839	1	3	3	3	Good	0.454122	In	73	0.0578267	0.909526
1106	DB01320	1	3	3	3	Good	0.4536	In	52	0.0965487	0.899054
406	DB00542	1	3	3	3	Good	0.451348	In	45	0.00189003	0.998208
1427	DB06274	1	3	3	3	Good	0.451348	In	45	0.00189003	0.998208
2106	DB11942	1	3	3	3	Good	0.451348	In	45	0.00189003	0.998208
640	DB00789	1	3	3	3	Good	0.449747	In	90	0.0255544	0.922064
1850	DB09425	1	3	3	3	Good	0.449747	In	90	0.0255544	0.922064
1152	DB01407	1	3	3	3	Good	0.449596	In	50	0.092709	0.91831
1124	DB01346	1	3	3	3	Good	0.449558	In	44	0.0481749	0.947356
65	DB00184	1	3	3	3	Good	0.447881	In	7	0.00595789	0.9819
517	DB00657	1	3	3	3	Good	0.447881	In	7	0.00595789	0.9819
1513	DB06781	1	3	3	3	Good	0.447881	In	7	0.00595789	0.9819
2259	DB13262	1	3	3	3	Good	0.447881	In	7	0.00595789	0.9819
1573	DB08860	1	3	3	3	Good	0.446388	In	44	0.0479863	0.947963
2063	DB11699	1	3	3	3	Good	0.445076	In	86	0.105576	0.897488
1552	DB08329	1	3	3	3	Good	0.44413	In	93	0.044542	0.891006
584	DB00727	1	3	3	3	Good	0.444002	In	36	0.148876	0.808989
520	DB00660	1	3	3	3	Good	0.443602	In	45	0.0036568	0.996533
727	DB00881	1	3	3	3	Good	0.443602	In	45	0.0036568	0.996533
1254	DB02959	1	3	3	3	Good	0.443602	In	45	0.0036568	0.996533
1889	DB09552	1	3	3	3	Good	0.442705	In	113	0.0220884	0.977298
105	DB00225	1	3	3	3	Good	0.440957	In	90	0.0238121	0.92699
323	DB00451	1	3	3	3	Good	0.440628	In	49	0.0909374	0.92339
376	DB00509	1	3	3	3	Good	0.440628	In	49	0.0909374	0.92339
197	DB00321	1	3	3	3	Good	0.44021	In	44	0.047648	0.949148
329	DB00458	1	3	3	3	Good	0.44021	In	44	0.047648	0.949148
551	DB00692	1	3	3	3	Good	0.44021	In	44	0.047648	0.949148
767	DB00924	1	3	3	3	Good	0.44021	In	44	0.047648	0.949148
968	DB01142	1	3	3	3	Good	0.44021	In	44	0.047648	0.949148
83	DB00202	1	3	3	3	Good	0.439077	In	73	0.0599455	0.905738
1231	DB01718	1	3	3	3	Good	0.439077	In	73	0.0599455	0.905738
1249	DB02703	1	3	3	3	Good	0.438998	In	7	0.00771689	0.976557
558	DB00699	1	3	3	3	Good	0.438102	In	86	0.0938916	0.909191
978	DB01152	1	3	3	3	Good	0.436462	In	113	0.0206664	0.978729
1074	DB01251	1	3	3	3	Good	0.435835	In	80	0.0457159	0.958861
1412	DB06213	1	3	2	3	Good	0.434631	In	46	0.272905	0.755666
204	DB00328	1	3	3	3	Good	0.431581	In	80	0.045833	0.95809
281	DB00409	1	3	3	3	Good	0.430904	In	50	0.0596634	0.925479
365	DB00496	1	3	3	3	Good	0.430444	In	66	0.0448785	0.962742
1674	DB09074	1	3	3	3	Good	0.430444	In	66	0.0448785	0.962742
2083	DB11793	1	3	3	3	Good	0.430444	In	66	0.0448785	0.962742
2343	DB13970	1	3	3	3	Good	0.430407	In	73	0.0612186	0.903555
1699	DB09102	1	3	3	3	Good	0.4296	In	44	0.0471593	0.951191
896	DB01065	1	3	3	3	Good	0.429531	In	45	0.00686583	0.993491
1402	DB06201	1	3	3	3	Good	0.429531	In	45	0.00686583	0.993491
2406	DB14195	1	3	3	3	Good	0.429531	In	45	0.00686583	0.993491
2342	DB13967	1	3	3	3	Good	0.428196	In	64	0.0481434	0.951601
128	DB00249	1	3	2	3	Good	0.427651	In	51	0.276144	0.733658
75	DB00194	1	3	2	3	Good	0.426959	In	46	0.272777	0.756742
364	DB00495	1	3	2	3	Good	0.426959	In	46	0.272777	0.756742
415	DB00552	1	3	2	3	Good	0.426959	In	46	0.272777	0.756742
500	DB00640	1	3	2	3	Good	0.426959	In	46	0.272777	0.756742
2030	DB11590	1	3	3	3	Good	0.424702	In	87	0.0821614	0.825826
603	DB00747	1	3	2	3	Good	0.424677	In	46	0.280044	0.712645
945	DB01118	1	3	3	3	Good	0.423292	In	64	0.0478023	0.952429
503	DB00643	1	3	3	3	Good	0.42287	In	44	0.0469111	0.952491
583	DB00726	1	3	3	3	Good	0.42287	In	44	0.0469111	0.952491
591	DB00735	1	3	3	3	Good	0.42287	In	44	0.0469111	0.952491
844	DB01006	1	3	3	3	Good	0.42287	In	44	0.0469111	0.952491
855	DB01017	1	3	3	3	Good	0.42287	In	44	0.0469111	0.952491
1708	DB09119	1	3	3	3	Good	0.42287	In	44	0.0469111	0.952491
2245	DB13225	1	3	3	3	Good	0.42287	In	44	0.0469111	0.952491
155	DB00277	1	3	3	3	Good	0.422671	In	7	0.0109496	0.966736
268	DB00395	1	3	3	3	Good	0.420808	In	73	0.0626692	0.901138
1068	DB01245	1	3	3	3	Good	0.420808	In	73	0.0626692	0.901138
402	DB00538	1	3	3	3	Good	0.420557	In	90	0.0197685	0.938627
800	DB00960	1	3	3	3	Good	0.417084	In	45	0.00970458	0.9908
801	DB00961	1	3	3	3	Good	0.417084	In	45	0.00970458	0.9908
279	DB00406	1	3	3	3	Good	0.416395	In	44	0.0467186	0.953745
1411	DB06212	1	3	3	3	Good	0.412893	In	27	0.172607	0.804101
2031	DB11591	1	3	3	3	Good	0.412213	In	44	0.0466187	0.954557
2054	DB11653	1	3	3	3	Good	0.411384	In	45	0.0110046	0.989567
1143	DB01393	1	3	3	3	Good	0.41054	In	50	0.0568618	0.929301
1431	DB06288	1	3	3	3	Good	0.41054	In	50	0.0568618	0.929301
73	DB00192	1	3	3	3	Good	0.40713	In	44	0.0465231	0.955545
890	DB01059	1	3	3	3	Good	0.40713	In	44	0.0465231	0.955545
1328	DB04844	1	3	3	3	Good	0.40713	In	44	0.0465231	0.955545
1655	DB09049	1	3	3	3	Good	0.40713	In	44	0.0465231	0.955545
2136	DB12161	1	3	3	3	Good	0.40713	In	44	0.0465231	0.955545
147	DB00268	1	3	3	3	Good	0.405995	In	45	0.0122337	0.988402
166	DB00289	1	3	3	3	Good	0.405995	In	45	0.0122337	0.988402
434	DB00571	1	3	3	3	Good	0.405995	In	45	0.0122337	0.988402
1943	DB11160	1	3	3	3	Good	0.405995	In	45	0.0122337	0.988402
314	DB00442	1	3	2	3	Good	0.405588	In	46	0.272478	0.759754
903	DB01073	1	3	2	3	Good	0.405588	In	46	0.272478	0.759754
1299	DB04574	1	3	3	3	Good	0.40555	In	135	0.0534374	0.857321
1485	DB06717	1	3	3	3	Good	0.404856	In	80	0.0470008	0.953249
1267	DB03312	1	3	2	3	Good	0.404115	In	62	0.276217	0.733596
217	DB00342	1	3	3	3	Good	0.402202	In	44	0.0464578	0.956506
1166	DB01430	1	3	3	3	Good	0.402202	In	44	0.0464578	0.956506
1781	DB09291	1	3	3	3	Good	0.402202	In	44	0.0464578	0.956506
2073	DB11742	1	3	3	3	Good	0.402202	In	44	0.0464578	0.956506
2211	DB13074	1	3	3	3	Good	0.402202	In	44	0.0464578	0.956506
52	DB00169	1	3	3	3	Good	0.401242	In	7	0.0151926	0.953846
82	DB00201	1	3	3	3	Good	0.401242	In	7	0.0151926	0.953846
701	DB00853	1	3	3	3	Good	0.401242	In	7	0.0151926	0.953846
1765	DB09256	1	3	3	3	Good	0.401242	In	7	0.0151926	0.953846
1994	DB11315	1	3	2	3	Good	0.399507	In	46	0.279131	0.715793
2516	DB15413	1	3	2	3	Good	0.398853	In	88	0.0444282	0.963313
1527	DB06797	1	3	3	3	Good	0.398155	In	73	0.0662475	0.895434
173	DB00296	1	3	3	3	Good	0.396054	In	45	0.0145011	0.986252
998	DB01173	1	3	3	3	Good	0.396054	In	45	0.0145011	0.986252
157	DB00279	1	3	3	3	Good	0.395452	In	49	0.0652652	0.921973
1348	DB04930	1	3	3	3	Good	0.394615	In	93	0	1
81	DB00200	1	3	2	3	Good	0.394515	In	97	0.175006	0.869832
1269	DB03614	1	3	2	3	Good	0.394515	In	97	0.175006	0.869832
440	DB00577	1	3	3	3	Good	0.393589	In	79	0.0908877	0.90326
356	DB00487	1	3	3	3	Good	0.39278	In	44	0.0464082	0.958347
1400	DB06193	1	3	3	3	Good	0.39278	In	44	0.0464082	0.958347
1201	DB01600	1	3	3	3	Good	0.392191	In	89	0.041628	0.875244
37	DB00146	1	3	3	3	Good	0.39169	In	7	0.0170841	0.9481
42	DB00153	1	3	3	3	Good	0.39169	In	7	0.0170841	0.9481
107	DB00227	1	3	3	3	Good	0.39169	In	7	0.0170841	0.9481
901	DB01070	1	3	3	3	Good	0.39169	In	7	0.0170841	0.9481
1168	DB01436	1	3	3	3	Good	0.39169	In	7	0.0170841	0.9481
240	DB00365	1	3	3	3	Good	0.3904	In	66	0.0457363	0.955423
963	DB01137	1	3	3	3	Good	0.3904	In	66	0.0457363	0.955423
990	DB01165	1	3	3	3	Good	0.3904	In	66	0.0457363	0.955423
256	DB00382	1	3	3	3	Good	0.388772	In	102	0.0412286	0.908786
2304	DB13783	1	3	3	3	Good	0.388527	In	80	0.0480649	0.95029
174	DB00297	1	3	3	3	Good	0.387089	In	45	0.0165455	0.984314
386	DB00521	1	3	3	3	Good	0.387089	In	45	0.0165455	0.984314
840	DB01002	1	3	3	3	Good	0.387089	In	45	0.0165455	0.984314
1034	DB01210	1	3	3	3	Good	0.387089	In	45	0.0165455	0.984314
2393	DB14178	1	3	3	3	Good	0.386525	In	96	0.0420263	0.836698
1092	DB01280	1	3	2	3	Good	0.386391	In	46	0.272279	0.762481
2511	DB15102	1	3	3	3	Good	0.385859	In	66	0.0459395	0.954593
186	DB00309	1	3	3	3	Good	0.385585	In	66	0.0191709	0.984334
246	DB00371	1	3	3	3	Good	0.384659	In	73	0.0684717	0.892035
791	DB00950	1	3	3	3	Good	0.383896	In	44	0.0464523	0.956532
28	DB00136	1	3	3	3	Good	0.382803	In	7	0.0188436	0.942755
501	DB00641	1	3	3	3	Good	0.382803	In	7	0.0188436	0.942755
753	DB00910	1	3	3	3	Good	0.382803	In	7	0.0188436	0.942755
1438	DB06410	1	3	3	3	Good	0.382803	In	7	0.0188436	0.942755
781	DB00940	1	3	3	3	Good	0.379642	In	44	0.0465045	0.955663
341	DB00472	1	3	3	3	Good	0.378966	In	45	0.0183983	0.982558
705	DB00857	1	3	3	3	Good	0.378966	In	45	0.0183983	0.982558
909	DB01079	1	3	3	3	Good	0.378966	In	45	0.0183983	0.982558
1028	DB01203	1	3	3	3	Good	0.378966	In	45	0.0183983	0.982558
1041	DB01217	1	3	3	3	Good	0.378966	In	45	0.0183983	0.982558
1394	DB06152	1	3	3	3	Good	0.378966	In	45	0.0183983	0.982558
1618	DB08941	1	3	3	3	Good	0.378966	In	45	0.0183983	0.982558
726	DB00880	1	3	3	3	Good	0.376582	In	93	0.0600946	0.842569
2079	DB11760	1	3	3	3	Good	0.374383	In	66	0.0167045	0.986322
878	DB01044	1	3	3	3	Good	0.372781	In	66	0.0466397	0.952203
1098	DB01294	1	3	3	3	Good	0.367887	In	135	0	1
1051	DB01228	1	3	3	3	Good	0.36757	In	75	0.0467236	0.95373
1331	DB04847	1	3	3	3	Good	0.36757	In	75	0.0467236	0.95373
1445	DB06589	1	3	3	3	Good	0.366393	In	80	0.00874785	0.992938
236	DB00361	1	3	3	3	Good	0.363614	In	66	0.0143335	0.98824
1949	DB11180	1	3	3	3	Good	0.361838	In	34	0.0282939	0.917381
750	DB00907	1	3	3	3	Good	0.36163	In	86	0.0797836	0.895715
201	DB00325	1	3	3	3	Good	0.361101	In	36	0.18524	0.714795
479	DB00619	1	3	3	3	Good	0.360464	In	66	0.0474496	0.949952
1007	DB01182	1	3	3	3	Good	0.358601	In	45	0.0230428	0.978154
2095	DB11842	1	3	3	3	Good	0.358601	In	45	0.0230428	0.978154
1957	DB11197	1	3	3	3	Good	0.358208	In	96	0.0407413	0.851482
2053	DB11652	1	3	3	3	Good	0.35735	In	66	0.0129545	0.98936
691	DB00843	1	3	3	3	Good	0.356517	In	66	0.0477389	0.94923
635	DB00782	1	3	3	3	Good	0.356438	In	75	0.0465268	0.955916
1642	DB09020	1	3	3	3	Good	0.356438	In	75	0.0465268	0.955916
2070	DB11732	1	3	3	3	Good	0.356438	In	75	0.0465268	0.955916
902	DB01072	1	3	3	3	Good	0.355685	In	45	0.0237078	0.977524
906	DB01076	1	3	3	3	Good	0.352917	In	75	0.0464933	0.956609
2269	DB13279	1	3	3	3	Good	0.352885	In	45	0.0243466	0.976918
633	DB00779	1	3	3	3	Good	0.352699	In	7	0.0248043	0.924647
920	DB01090	1	3	3	3	Good	0.352699	In	7	0.0248043	0.924647
1107	DB01322	1	3	3	3	Good	0.352699	In	7	0.0248043	0.924647
1509	DB06775	1	3	3	3	Good	0.351743	In	73	0.0741412	0.883747
2087	DB11815	1	3	3	3	Good	0.351743	In	73	0.0741412	0.883747
2243	DB13221	1	3	3	3	Good	0.351743	In	73	0.0741412	0.883747
2468	DB14600	1	3	3	3	Good	0.349233	In	34	0.0307905	0.910091
221	DB00346	1	3	3	3	Good	0.346141	In	75	0.0464676	0.957947
534	DB00675	1	3	3	3	Good	0.346141	In	75	0.0464676	0.957947
1081	DB01261	1	3	3	3	Good	0.346141	In	75	0.0464676	0.957947
27	DB00135	1	3	3	3	Good	0.345719	In	113	0	1
68	DB00187	1	3	3	3	Good	0.345719	In	113	0	1
143	DB00264	1	3	3	3	Good	0.345719	In	113	0	1
210	DB00335	1	3	3	3	Good	0.345719	In	113	0	1
261	DB00388	1	3	3	3	Good	0.345719	In	113	0	1
437	DB00574	1	3	3	3	Good	0.345719	In	113	0	1
472	DB00610	1	3	3	3	Good	0.345719	In	113	0	1
474	DB00612	1	3	3	3	Good	0.345719	In	113	0	1
606	DB00750	1	3	3	3	Good	0.345719	In	113	0	1
620	DB00765	1	3	3	3	Good	0.345719	In	113	0	1
828	DB00989	1	3	3	3	Good	0.345719	In	113	0	1
871	DB01035	1	3	3	3	Good	0.345719	In	113	0	1
993	DB01168	1	3	3	3	Good	0.345719	In	113	0	1
1016	DB01191	1	3	3	3	Good	0.345719	In	113	0	1
1100	DB01297	1	3	3	3	Good	0.345719	In	113	0	1
1148	DB01400	1	3	3	3	Good	0.345719	In	113	0	1
1185	DB01580	1	3	3	3	Good	0.345719	In	113	0	1
1405	DB06204	1	3	3	3	Good	0.345719	In	113	0	1
1585	DB08880	1	3	3	3	Good	0.345719	In	113	0	1
1635	DB08985	1	3	3	3	Good	0.345719	In	113	0	1
1812	DB09352	1	3	3	3	Good	0.345719	In	113	0	1
1914	DB11102	1	3	3	3	Good	0.345719	In	113	0	1
2036	DB11610	1	3	3	3	Good	0.345719	In	113	0	1
2268	DB13278	1	3	3	3	Good	0.345719	In	113	0	1
2290	DB13624	1	3	3	3	Good	0.345719	In	113	0	1
970	DB01144	1	3	3	3	Good	0.344707	In	31	0.0918593	0.828402
433	DB00570	1	3	3	3	Good	0.34328	In	66	0.0098567	0.991884
2050	DB11641	1	3	3	3	Good	0.34328	In	66	0.0098567	0.991884
1020	DB01195	1	3	3	3	Good	0.342707	In	45	0.0266679	0.974718
2228	DB13157	1	3	3	3	Good	0.342058	In	34	0.0322116	0.905941
1968	DB11226	1	3	3	3	Good	0.338157	In	45	0.0277056	0.973734
1787	DB09300	1	3	2	3	Good	0.336581	In	46	0.277329	0.723786
1639	DB09009	1	3	3	3	Good	0.336417	In	41	0.0545861	0.9371
334	DB00464	1	3	3	3	Good	0.334188	In	34	0.0337702	0.90139
1944	DB11164	1	3	3	3	Good	0.334188	In	34	0.0337702	0.90139
2128	DB12097	1	3	3	3	Good	0.334188	In	34	0.0337702	0.90139
1782	DB09292	1	3	3	3	Good	0.333917	In	119	0.0275264	0.973299
645	DB00794	1	3	3	3	Good	0.333687	In	51	0.101507	0.866356
405	DB00541	1	3	3	3	Good	0.333671	In	66	0.00774111	0.993614
515	DB00655	1	3	3	3	Good	0.328462	In	102	0.0691486	0.809457
636	DB00783	1	3	3	3	Good	0.328462	In	102	0.0691486	0.809457
809	DB00970	1	3	3	3	Good	0.327702	In	45	0.0464897	0.957786
924	DB01095	1	3	3	3	Good	0.327702	In	45	0.0464897	0.957786
2101	DB11915	1	3	3	3	Good	0.327702	In	45	0.0464897	0.957786
1325	DB04841	1	3	3	3	Good	0.327474	In	66	0.0502795	0.943922
2148	DB12329	1	3	3	3	Good	0.327474	In	66	0.0502795	0.943922
567	DB00710	1	3	3	3	Good	0.325518	In	34	0.0354873	0.896376
2314	DB13867	1	3	3	3	Good	0.324599	In	7	0.0905395	0.719519
1698	DB09101	1	3	2	3	Good	0.321084	In	18	0.254865	0.8205
1333	DB04855	1	3	3	3	Good	0.320898	In	64	0.045695	0.959557
12	DB00114	1	3	3	3	Good	0.320825	In	90	0	1
619	DB00763	1	3	3	3	Good	0.320825	In	118	0	1
678	DB00828	1	3	3	3	Good	0.320825	In	90	0	1
1022	DB01197	1	3	3	3	Good	0.320825	In	90	0	1
1137	DB01377	1	3	3	3	Good	0.320825	In	118	0	1
1489	DB06724	1	3	3	3	Good	0.320825	In	118	0	1
1705	DB09116	1	3	3	3	Good	0.320825	In	118	0	1
1766	DB09257	1	3	3	3	Good	0.320825	In	90	0	1
1862	DB09481	1	3	3	3	Good	0.320825	In	118	0	1
1927	DB11134	1	3	3	3	Good	0.320825	In	118	0	1
2222	DB13145	1	3	3	3	Good	0.320825	In	90	0	1
2340	DB13962	1	3	3	3	Good	0.320825	In	90	0	1
2428	DB14489	1	3	3	3	Good	0.320825	In	90	0	1
2430	DB14491	1	3	3	3	Good	0.320825	In	90	0	1
2529	DB15555	1	3	3	3	Good	0.320825	In	90	0	1
1300	DB04575	1	3	3	3	Good	0.320416	In	102	0.0678517	0.812049
350	DB00481	1	3	3	3	Good	0.319777	In	80	0.0532326	0.943842
1422	DB06249	1	3	3	3	Good	0.319777	In	80	0.0532326	0.943842
1371	DB05316	1	3	3	3	Good	0.319415	In	45	0.0465281	0.95607
2543	DB15793	1	3	3	3	Good	0.31862	In	93	0.0638914	0.823465
803	DB00963	1	3	3	3	Good	0.316059	In	64	0.0456346	0.960421
2288	DB13615	1	3	2	3	Good	0.315992	In	70	0.290127	0.692224
1403	DB06202	1	3	3	3	Good	0.31547	In	66	0.00373395	0.99691
2082	DB11791	1	3	3	3	Good	0.31547	In	66	0.00373395	0.99691
1724	DB09138	1	3	3	3	Good	0.314788	In	34	0.0902735	0.738739
1821	DB09374	1	3	3	3	Good	0.314724	In	94	0.00332769	0.997531
58	DB00177	1	3	3	3	Good	0.311668	In	45	0.0466332	0.954466
857	DB01019	1	3	3	3	Good	0.307541	In	73	0.0821957	0.872617
1799	DB09327	1	3	3	3	Good	0.302134	In	99	0.0327149	0.888889
2093	DB11835	1	3	2	3	Good	0.301788	In	97	0.178141	0.851448
950	DB01123	1	3	3	3	Good	0.29851	In	66	0	1
2149	DB12332	1	3	3	3	Good	0.29851	In	66	0	1
1298	DB04573	1	3	3	3	Good	0.297551	In	102	0.0642458	0.819508
2540	DB15690	1	3	3	3	Good	0.297551	In	102	0.0642458	0.819508
2059	DB11678	1	3	3	3	Good	0.293266	In	96	0.0301798	0.89912
1522	DB06791	1	3	3	3	Good	0.292971	In	49	0.044479	0.966013
324	DB00452	1	3	2	3	Good	0.292322	In	46	0.272272	0.760505
2097	DB11855	1	3	3	3	Good	0.290936	In	66	0.0543827	0.937243
2138	DB12243	1	3	3	3	Good	0.290738	In	132	0	1
1447	DB06594	1	3	3	3	Good	0.285151	In	50	0.0462315	0.957524
1463	DB06694	1	3	3	3	Good	0.285151	In	50	0.0462315	0.957524
1743	DB09161	1	3	3	3	Good	0.285111	In	118	0.00707926	0.976585
452	DB00590	1	3	3	3	Good	0.282669	In	66	0.00348775	0.997105
1459	DB06684	1	3	3	3	Good	0.282669	In	66	0.00348775	0.997105
2010	DB11386	1	3	3	3	Good	0.281971	In	120	0.0401453	0.866454
1063	DB01240	1	3	3	3	Good	0.281769	In	99	0.0286815	0.901235
1350	DB04938	1	3	2	3	Good	0.281274	In	27	0.249519	0.763218
1599	DB08903	1	3	3	3	Good	0.280469	In	80	0.0492356	0.950229
19	DB00123	1	3	3	3	Good	0.279225	In	73	0.0875631	0.865487
283	DB00411	1	3	3	3	Good	0.279225	In	73	0.0875631	0.865487
1474	DB06706	1	3	3	3	Good	0.279225	In	73	0.0875631	0.865487
1757	DB09219	1	3	3	3	Good	0.277618	In	66	0.00459979	0.996181
450	DB00588	1	3	3	3	Good	0.277405	In	7	0.0902747	0.726393
154	DB00276	1	3	3	3	Good	0.276522	In	80	0.0489029	0.950876
2336	DB13954	1	3	3	3	Good	0.276422	In	102	0.0610334	0.826523
918	DB01088	1	3	3	3	Good	0.276053	In	99	0.0275494	0.904762
917	DB01087	1	3	3	3	Good	0.274062	In	50	0.0437098	0.959747
1530	DB06802	1	3	3	3	Good	0.274062	In	50	0.0437098	0.959747
1669	DB09069	1	3	3	3	Good	0.274062	In	50	0.0437098	0.959747
784	DB00943	1	3	2	3	Good	0.273883	In	51	0.272365	0.764349
571	DB00714	1	3	3	3	Good	0.27336	In	66	0.0506637	0.946275
1966	DB11219	1	3	3	3	Good	0.272013	In	102	0.0177188	0.958648
880	DB01046	1	3	3	3	Good	0.270771	In	99	0.0265032	0.908046
704	DB00856	1	3	2	3	Good	0.270555	In	48	0.254081	0.728655
1728	DB09143	1	3	3	3	Good	0.270269	In	66	0.0570763	0.933466
2490	DB14726	1	3	3	3	Good	0.270269	In	66	0.0570763	0.933466
816	DB00977	1	3	3	3	Good	0.269731	In	102	0.0600431	0.82877
2137	DB12235	1	3	3	3	Good	0.269731	In	102	0.0600431	0.82877
1167	DB01435	1	3	3	3	Good	0.269309	In	89	0.00368609	0.989697
1353	DB04951	1	3	3	3	Good	0.269309	In	89	0.00368609	0.989697
497	DB00637	1	3	3	3	Good	0.267838	In	66	0.00675289	0.994394
929	DB01100	1	3	3	3	Good	0.267838	In	66	0.00675289	0.994394
1441	DB06414	1	3	3	3	Good	0.266146	In	80	0.0135904	0.98895
231	DB00356	1	3	3	3	Good	0.266043	In	135	0.0415235	0.905591
397	DB00533	1	3	3	3	Good	0.266043	In	135	0.0415235	0.905591
1524	DB06794	1	3	3	3	Good	0.265724	In	50	0.0463545	0.957416
1270	DB03615	1	3	2	3	Good	0.265596	In	51	0.272354	0.765561
2264	DB13270	1	3	2	3	Good	0.265596	In	51	0.272354	0.765561
1744	DB09164	1	3	3	3	Good	0.265513	In	119	0.055663	0.926687
490	DB00630	1	3	3	3	Good	0.264435	In	96	0.0244966	0.916531
846	DB01008	1	3	3	3	Good	0.264435	In	96	0.0244966	0.916531
2559	DB16226	1	3	3	3	Good	0.264385	In	80	0.0479666	0.952868
11	DB00106	1	3	2	3	Good	0.263922	In	26	0.255218	0.822896
564	DB00706	1	3	3	3	Good	0.262712	In	64	0.0466587	0.953756
670	DB00820	1	3	3	3	Good	0.262602	In	66	0.110119	0.865654
6	DB00050	1	3	2	3	Good	0.262094	In	26	0.255216	0.823059
95	DB00215	1	3	3	3	Good	0.260847	In	66	0.0583808	0.931744
921	DB01091	1	3	3	3	Good	0.260847	In	66	0.0583808	0.931744
1000	DB01175	1	3	3	3	Good	0.260847	In	66	0.0583808	0.931744
716	DB00870	1	3	3	3	Good	0.260258	In	135	0.0216897	0.952035
955	DB01128	1	3	3	3	Good	0.258162	In	64	0.0468858	0.952909
628	DB00774	1	3	3	3	Good	0.258083	In	42	0.13307	0.849504
509	DB00649	1	3	2	3	Good	0.257849	In	51	0.272356	0.76497
543	DB00684	1	3	2	3	Good	0.257849	In	51	0.272356	0.76497
1082	DB01262	1	3	2	3	Good	0.257849	In	51	0.272356	0.76497
56	DB00175	1	3	3	3	Good	0.257085	In	99	0.0237926	0.916667
1047	DB01223	1	3	3	3	Good	0.257085	In	99	0.0237926	0.916667
312	DB00440	1	3	3	3	Good	0.255156	In	50	0.0394105	0.963562
713	DB00867	1	3	3	3	Good	0.255156	In	50	0.0394105	0.963562
1133	DB01366	1	3	3	3	Good	0.255156	In	50	0.0394105	0.963562
296	DB00424	1	3	2	3	Good	0.254457	In	46	0.276029	0.734491
435	DB00572	1	3	2	3	Good	0.254457	In	46	0.276029	0.734491
2091	DB11827	1	3	2	3	Good	0.252311	In	27	0.255462	0.728757
532	DB00673	1	3	3	3	Good	0.251963	In	66	0.0596507	0.93012
997	DB01172	1	3	2	3	Good	0.250592	In	51	0.272368	0.763581
622	DB00768	1	3	3	3	Good	0.247709	In	66	0.0602718	0.929342
817	DB00978	1	3	3	3	Good	0.247709	In	66	0.0602718	0.929342
1364	DB05239	1	3	3	3	Good	0.247479	In	80	0.0468918	0.955657
1370	DB05294	1	3	3	3	Good	0.247479	In	80	0.0468918	0.955657
1457	DB06654	1	3	3	3	Good	0.247032	In	50	0.0375631	0.965211
160	DB00282	1	3	3	3	Good	0.246855	In	96	0.0210312	0.927483
1517	DB06785	1	3	2	3	Good	0.245661	In	26	0.255224	0.82232
379	DB00513	1	3	3	3	Good	0.245049	In	73	0.0942107	0.856881
1128	DB01357	1	3	3	3	Good	0.24456	In	102	0.0564504	0.837332
2334	DB13952	1	3	3	3	Good	0.24456	In	102	0.0564504	0.837332
198	DB00322	1	3	2	3	Good	0.243779	In	51	0.272387	0.762277
662	DB00811	1	3	2	3	Good	0.243779	In	51	0.272387	0.762277
770	DB00928	1	3	2	3	Good	0.243779	In	51	0.272387	0.762277
826	DB00987	1	3	2	3	Good	0.243779	In	51	0.272387	0.762277
1085	DB01265	1	3	2	3	Good	0.243779	In	51	0.272387	0.762277
1826	DB09382	1	3	3	3	Good	0.24083	In	87	0.0410807	0.904605
1852	DB09448	1	3	3	3	Good	0.24083	In	87	0.0410807	0.904605
282	DB00410	1	3	3	3	Good	0.23959	In	99	0.0203277	0.927928
1648	DB09038	1	3	2	3	Good	0.239291	In	27	0.25504	0.730156
1103	DB01301	1	3	3	3	Good	0.238931	In	44	0.0949541	0.904413
1626	DB08958	1	3	3	3	Good	0.235804	In	79	0.0984689	0.866952
850	DB01012	1	3	3	3	Good	0.235636	In	66	0.0620776	0.927136
460	DB00598	1	3	3	3	Good	0.232874	In	50	0.0343434	0.968098
872	DB01036	1	3	3	3	Good	0.232874	In	50	0.0343434	0.968098
1381	DB05676	1	3	3	3	Good	0.231673	In	64	0.0126395	0.989581
1597	DB08899	1	3	3	3	Good	0.231673	In	64	0.0126395	0.989581
313	DB00441	1	3	2	3	Good	0.231332	In	51	0.272445	0.759895
511	DB00651	1	3	2	3	Good	0.231332	In	51	0.272445	0.759895
2281	DB13421	1	3	2	3	Good	0.231332	In	51	0.272445	0.759895
2541	DB15694	1	3	2	3	Good	0.231332	In	51	0.272445	0.759895
1903	DB11080	1	3	3	3	Good	0.230945	In	36	0.204647	0.686395
1179	DB01563	1	3	3	3	Good	0.228936	In	61	0.0400972	0.861647
1818	DB09370	1	3	3	3	Good	0.228936	In	61	0.0400972	0.861647
1825	DB09380	1	3	3	3	Good	0.228936	In	61	0.0400972	0.861647
1844	DB09414	1	3	3	3	Good	0.228936	In	61	0.0400972	0.861647
1857	DB09472	1	3	3	3	Good	0.228936	In	61	0.0400972	0.861647
1864	DB09484	1	3	3	3	Good	0.228936	In	61	0.0400972	0.861647
2432	DB14496	1	3	3	3	Good	0.228936	In	61	0.0400972	0.861647
2434	DB14499	1	3	3	3	Good	0.228936	In	61	0.0400972	0.861647
2437	DB14502	1	3	3	3	Good	0.228936	In	61	0.0400972	0.861647
2159	DB12455	1	3	3	3	Good	0.228117	In	66	0.0632327	0.925761
1496	DB06755	1	3	3	3	Good	0.226543	In	99	0.0177437	0.936508
2295	DB13707	1	3	3	3	Good	0.226499	In	96	0.0170187	0.940495
2009	DB11363	1	3	3	3	Good	0.225417	In	66	0.0467108	0.954187
1032	DB01208	1	3	3	3	Good	0.224583	In	66	0.0162762	0.986488
573	DB00716	1	3	3	3	Good	0.224504	In	66	0.0637955	0.925101
169	DB00292	1	3	3	3	Good	0.223911	In	86	0.0663684	0.916964
29	DB00137	1	3	3	3	Good	0.222208	In	99	0.0168851	0.939394
1947	DB11176	1	3	3	3	Good	0.222208	In	99	0.0168851	0.939394
1654	DB09048	1	3	3	3	Good	0.220984	In	66	0.0643487	0.924458
1732	DB09148	1	3	3	3	Good	0.220951	In	50	0.0316321	0.970542
2146	DB12313	1	3	3	3	Good	0.220951	In	50	0.0316321	0.970542
1566	DB08822	1	3	3	3	Good	0.216658	In	117	0.255088	0.800689
925	DB01096	1	3	2	3	Good	0.214543	In	91	0.22504	0.833375
423	DB00560	1	3	3	3	Good	0.214207	In	66	0.0654262	0.923219
2527	DB15534	1	3	3	3	Good	0.214207	In	66	0.0654262	0.923219
2173	DB12537	1	3	3	3	Good	0.214104	In	102	0.00605868	0.985465
71	DB00190	1	3	3	3	Good	0.213785	In	119	0	1
92	DB00211	1	3	3	3	Good	0.213785	In	119	0	1
101	DB00221	1	3	3	3	Good	0.213785	In	119	0	1
159	DB00281	1	3	3	3	Good	0.213785	In	119	0	1
243	DB00368	1	3	3	3	Good	0.213785	In	119	0	1
253	DB00379	1	3	3	3	Good	0.213785	In	119	0	1
321	DB00449	1	3	3	3	Good	0.213785	In	119	0	1
527	DB00668	1	3	3	3	Good	0.213785	In	119	0	1
580	DB00723	1	3	3	3	Good	0.213785	In	119	0	1
666	DB00816	1	3	3	3	Good	0.213785	In	119	0	1
717	DB00871	1	3	3	3	Good	0.213785	In	119	0	1
807	DB00968	1	3	3	3	Good	0.213785	In	119	0	1
827	DB00988	1	3	3	3	Good	0.213785	In	119	0	1
887	DB01056	1	3	3	3	Good	0.213785	In	119	0	1
895	DB01064	1	3	3	3	Good	0.213785	In	119	0	1
1018	DB01193	1	3	3	3	Good	0.213785	In	119	0	1
1058	DB01235	1	3	3	3	Good	0.213785	In	119	0	1
1330	DB04846	1	3	3	3	Good	0.213785	In	119	9.09e-15	1
1424	DB06262	1	3	3	3	Good	0.213785	In	119	0	1
1475	DB06707	1	3	3	3	Good	0.213785	In	119	0	1
1508	DB06774	1	3	3	3	Good	0.213785	In	119	0	1
1636	DB08987	1	3	3	3	Good	0.213785	In	119	0	1
1643	DB09026	1	3	3	3	Good	0.213785	In	119	1.82e-14	1
1709	DB09120	1	3	3	3	Good	0.213785	In	119	0	1
342	DB00473	1	3	3	3	Good	0.212822	In	86	0.0657944	0.918719
1071	DB01248	1	3	3	3	Good	0.210982	In	86	0.062637	0.932951
304	DB00432	1	3	2	3	Good	0.210301	In	62	0.272488	0.760473
348	DB00479	1	3	2	3	Good	0.210301	In	62	0.272488	0.760473
912	DB01082	1	3	2	3	Good	0.210301	In	62	0.272488	0.760473
2323	DB13910	1	3	3	3	Good	0.209546	In	118	0.0220575	0.927043
1334	DB04861	1	3	3	3	Good	0.209524	In	66	0.0195917	0.983735
1958	DB11200	1	3	3	3	Good	0.208044	In	61	0.0403072	0.847467
207	DB00332	1	3	2	3	Good	0.207028	In	46	0.275827	0.740819
1337	DB04868	1	3	3	3	Good	0.205932	In	66	0.0203826	0.983079
1598	DB08901	1	3	3	3	Good	0.205932	In	66	0.0203826	0.983079
2179	DB12615	1	3	2	3	Good	0.205706	In	62	0.272507	0.759588
1144	DB01394	1	3	3	3	Good	0.204655	In	80	0.0661315	0.913361
907	DB01077	1	3	3	3	Good	0.202653	In	96	0.0123183	0.95621
1582	DB08874	1	3	3	3	Good	0.202228	In	101	0.229834	0.787964
2034	DB11602	1	3	3	3	Good	0.20181	In	99	0.0128451	0.953216
1507	DB06772	1	3	3	3	Good	0.199607	In	86	0.0609195	0.934746
1	DB00006	1	3	3	3	Good	0.198023	In	50	0.026418	0.975278
1906	DB11089	1	3	3	3	Good	0.1979	In	118	0.0243658	0.919408
1877	DB09512	1	3	3	3	Good	0.196869	In	83	0.0404199	0.853676
788	DB00947	1	3	3	3	Good	0.196091	In	93	0.0414008	0.916808
812	DB00973	1	3	3	3	Good	0.195541	In	66	0.0226704	0.981179
2469	DB14627	1	3	3	3	Good	0.195541	In	66	0.0226704	0.981179
718	DB00872	1	3	3	3	Good	0.194299	In	66	0.0452917	0.959394
2537	DB15678	1	3	3	3	Good	0.193457	In	118	0.0252465	0.916495
1691	DB09092	1	3	2	3	Good	0.193213	In	79	0.272533	0.761994
1917	DB11115	1	3	3	3	Good	0.192018	In	93	0.0627407	0.823032
367	DB00498	1	3	3	3	Good	0.191006	In	102	0.0496697	0.856151
1551	DB07776	1	3	3	3	Good	0.191006	In	102	0.0496697	0.856151
1202	DB01601	1	3	3	3	Good	0.190181	In	64	0.0661912	0.912665
1464	DB06695	1	3	3	3	Good	0.190181	In	64	0.0661912	0.912665
13	DB00115	1	3	2	3	Good	0.189611	In	97	0.171575	0.884647
1828	DB09385	1	3	2	3	Good	0.189611	In	97	0.171575	0.884647
1829	DB09387	1	3	2	3	Good	0.189611	In	97	0.171575	0.884647
1401	DB06196	1	3	2	3	Good	0.188301	In	97	0.261826	0.790861
1193	DB01590	1	3	2	3	Good	0.188208	In	79	0.27254	0.761024
122	DB00243	1	3	3	3	Good	0.187482	In	64	0.0660572	0.913118
1322	DB04838	1	3	3	3	Good	0.187288	In	89	0.0127107	0.964101
2376	DB14106	1	3	3	3	Good	0.185293	In	118	0.0268649	0.911143
2338	DB13956	1	3	3	3	Good	0.181635	In	102	0.048632	0.859532
2526	DB15494	1	3	2	3	Good	0.178726	In	97	0.137112	0.879469
2198	DB12887	1	3	3	3	Good	0.176343	In	66	0.0268971	0.97767
1723	DB09137	1	3	3	3	Good	0.174804	In	64	0.0956937	0.870082
429	DB00566	1	3	3	3	Good	0.174336	In	96	0.00673657	0.975567
2371	DB14089	1	3	3	3	Good	0.174336	In	96	0.00673657	0.975567
2387	DB14159	1	3	3	3	Good	0.174336	In	96	0.00673657	0.975567
2410	DB14199	1	3	3	3	Good	0.174336	In	96	0.00673657	0.975567
785	DB00944	1	3	3	3	Good	0.171441	In	50	0.0203732	0.980826
2119	DB12010	1	3	3	3	Good	0.170141	In	75	0.113866	0.848469
2554	DB16019	1	3	3	3	Good	0.162032	In	64	0.00293644	0.997554
1842	DB09411	1	3	3	3	Good	0.159992	In	83	0.0397742	0.873252
2133	DB12147	1	3	3	3	Good	0.159003	In	66	0.0307147	0.974501
53	DB00170	1	3	3	3	Good	0.158804	In	59	0	1
1134	DB01367	1	3	3	3	Good	0.158804	In	59	0	1
2019	DB11574	1	3	3	3	Good	0.158523	In	66	0.0449136	0.962661
2043	DB11630	1	3	3	3	Good	0.158207	In	66	0.0937892	0.911494
1954	DB11186	1	3	3	3	Good	0.156042	In	89	0.0189571	0.946459
2520	DB15463	1	3	3	3	Good	0.155641	In	80	0.0462694	0.957474
2246	DB13228	1	3	3	3	Good	0.154841	In	93	0.0428189	0.901102
2521	DB15465	1	3	3	3	Good	0.1536	In	86	0.18629	0.80403
550	DB00691	1	3	3	3	Good	0.153218	In	64	0.0648229	0.918915
2199	DB12911	1	3	3	3	Good	0.152545	In	41	0.094447	0.900327
2178	DB12612	1	3	2	3	Good	0.145964	In	91	0.254729	0.7844
776	DB00935	1	3	3	3	Good	0.142129	In	50	0.0637125	0.920455
1998	DB11328	1	3	3	3	Good	0.141646	In	118	0.0355163	0.882528
2171	DB12529	1	3	3	3	Good	0.140351	In	36	0.184686	0.739647
1283	DB04160	1	3	3	3	Good	0.140161	In	96	0	1
1433	DB06292	1	3	2	3	Good	0.139044	In	27	0.252672	0.741111
116	DB00237	1	3	3	3	Good	0.136953	In	99	0	1
120	DB00241	1	3	3	3	Good	0.136953	In	99	0	1
150	DB00272	1	3	3	3	Good	0.136953	In	99	0	1
183	DB00306	1	3	3	3	Good	0.136953	In	99	0	1
214	DB00339	1	3	3	3	Good	0.136953	In	99	0	1
222	DB00347	1	3	3	3	Good	0.136953	In	99	0	1
357	DB00488	1	3	3	3	Good	0.136953	In	99	0	1
387	DB00523	1	3	3	3	Good	0.136953	In	99	0	1
408	DB00544	1	3	3	3	Good	0.136953	In	99	0	1
454	DB00592	1	3	3	3	Good	0.136953	In	82	0	1
455	DB00593	1	3	3	3	Good	0.136953	In	99	0	1
477	DB00617	1	3	3	3	Good	0.136953	In	99	0	1
611	DB00755	1	3	3	3	Good	0.136953	In	99	0	1
624	DB00770	1	3	3	3	Good	0.136953	In	99	0	1
675	DB00825	1	3	3	3	Good	0.136953	In	99	0	1
760	DB00917	1	3	3	3	Good	0.136953	In	99	0	1
771	DB00929	1	3	3	3	Good	0.136953	In	82	0	1
792	DB00951	1	3	3	3	Good	0.136953	In	99	0	1
821	DB00982	1	3	3	3	Good	0.136953	In	99	0	1
834	DB00996	1	3	3	3	Good	0.136953	In	99	0	1
928	DB01099	1	3	3	3	Good	0.136953	In	99	0	1
935	DB01107	1	3	3	3	Good	0.136953	In	99	0	1
1027	DB01202	1	3	3	3	Good	0.136953	In	99	0	1
1037	DB01213	1	3	3	3	Good	0.136953	In	82	0	1
1248	DB02701	1	3	3	3	Good	0.136953	In	99	0	1
1257	DB03088	1	3	3	3	Good	0.136953	In	99	0	1
1263	DB03209	1	3	3	3	Good	0.136953	In	99	0	1
1373	DB05381	1	3	3	3	Good	0.136953	In	99	0	1
1456	DB06637	1	3	3	3	Good	0.136953	In	82	0	1
1548	DB06826	1	3	3	3	Good	0.136953	In	82	0	1
1569	DB08826	1	3	3	3	Good	0.136953	In	99	0	1
1627	DB08964	1	3	3	3	Good	0.136953	In	82	0	1
1706	DB09117	1	3	3	3	Good	0.136953	In	99	0	1
1752	DB09210	1	3	3	3	Good	0.136953	In	99	0	1
1771	DB09270	1	3	3	3	Good	0.136953	In	82	7.85e-15	1
1809	DB09348	1	3	3	3	Good	0.136953	In	82	0	1
1913	DB11100	1	3	3	3	Good	0.136953	In	99	0	1
2028	DB11588	1	3	3	3	Good	0.136953	In	82	0	1
2049	DB11640	1	3	3	3	Good	0.136953	In	99	0	1
2161	DB12466	1	3	3	3	Good	0.136953	In	99	0	1
2188	DB12789	1	3	3	3	Good	0.136953	In	99	0	1
2223	DB13146	1	3	3	3	Good	0.136953	In	99	0	1
2224	DB13153	1	3	3	3	Good	0.136953	In	99	0	1
2234	DB13178	1	3	3	3	Good	0.136953	In	99	0	1
2251	DB13247	1	3	3	3	Good	0.136953	In	99	0	1
2254	DB13253	1	3	3	3	Good	0.136953	In	99	0	1
2381	DB14123	1	3	3	3	Good	0.136953	In	99	0	1
1083	DB01263	1	3	3	3	Good	0.135905	In	66	0.0453838	0.958676
2567	DB16703	1	3	3	3	Good	0.135905	In	66	0.0453838	0.958676
2542	DB15779	1	3	3	3	Good	0.13379	In	64	0.0598407	0.929738
1308	DB04815	1	3	3	3	Good	0.130748	In	93	0.0825885	0.865631
1704	DB09115	1	3	3	3	Good	0.130748	In	93	0.0825885	0.865631
476	DB00615	1	3	3	3	Good	0.123521	In	66	0.0385266	0.968016
2494	DB14753	1	3	3	3	Good	0.123223	In	50	0.0608434	0.923963
1435	DB06401	1	3	3	3	Good	0.121992	In	66	0.0459395	0.956224
2305	DB13800	1	3	3	3	Good	0.121362	In	118	0.039537	0.869229
1052	DB01229	1	3	3	3	Good	0.121282	In	86	0.0829982	0.895746
514	DB00654	1	3	3	3	Good	0.121191	In	111	0.0232173	0.929227
1800	DB09330	1	3	3	3	Good	0.120029	In	66	0.0392954	0.967377
1564	DB08819	1	3	3	3	Good	0.117483	In	111	0.0224764	0.93133
1715	DB09129	1	3	3	3	Good	0.11733	In	83	0.0442023	0.859141
1867	DB09490	1	3	3	3	Good	0.11733	In	83	0.0442023	0.859141
1904	DB11081	1	3	3	3	Good	0.11733	In	83	0.0442023	0.859141
2459	DB14550	1	3	3	3	Good	0.11733	In	83	0.0442023	0.859141
2528	DB15536	1	3	3	3	Good	0.11733	In	83	0.0442023	0.859141
1814	DB09355	1	3	3	3	Good	0.117235	In	85	0.0389678	0.917471
1725	DB09139	1	3	3	3	Good	0.117134	In	83	0.0406438	0.846603
689	DB00841	1	3	3	3	Good	0.115099	In	50	0.0596634	0.925479
1096	DB01288	1	3	3	3	Good	0.115099	In	50	0.0596634	0.925479
1354	DB04953	1	3	3	3	Good	0.115099	In	50	0.0596634	0.925479
1075	DB01253	1	3	2	3	Good	0.112758	In	97	0.232179	0.793721
931	DB01102	1	3	3	3	Good	0.107703	In	50	0.0586191	0.926863
677	DB00827	1	3	3	3	Good	0.106997	In	44	0.105688	0.870207
412	DB00549	1	3	3	3	Good	0.105696	In	94	0.0443678	0.965442
190	DB00314	1	3	2	3	Good	0.104917	In	79	0.273328	0.744885
2042	DB11629	1	3	3	3	Good	0.104636	In	122	0.0935075	0.81338
1784	DB09296	1	3	3	3	Good	0.103703	In	66	0.0428899	0.964393
2362	DB14020	1	3	3	3	Good	0.102903	In	74	0.00694293	0.982707
78	DB00197	1	3	3	3	Good	0.102527	In	94	0.0444064	0.964929
1659	DB09055	1	3	2	3	Good	0.100969	In	121	0.13965	0.867078
605	DB00749	1	3	3	3	Good	0.0995109	In	102	0.0421402	0.890339
787	DB00946	1	3	3	3	Good	0.0995109	In	102	0.0421402	0.890339
1005	DB01180	1	3	3	3	Good	0.099003	In	66	0.0472803	0.952173
733	DB00888	1	3	3	3	Good	0.0980991	In	120	0	1
865	DB01028	1	3	3	3	Good	0.0980991	In	120	0	1
2436	DB14501	1	3	3	3	Good	0.0980991	In	120	0	1
135	DB00256	1	3	3	3	Good	0.0978468	In	75	0.0929468	0.918011
1030	DB01205	1	3	3	3	Good	0.0977631	In	86	0.0797836	0.899173
1336	DB04865	1	3	3	3	Good	0.0960175	In	44	0.105243	0.871983
1888	DB09550	1	3	2	3	Good	0.0948648	In	88	0.277055	0.769289
822	DB00983	1	3	3	3	Good	0.0947343	In	50	0.0568618	0.929301
1089	DB01274	1	3	3	3	Good	0.0947343	In	50	0.0568618	0.929301
228	DB00353	1	3	2	3	Good	0.0918654	In	97	0.231735	0.795936
2534	DB15594	1	3	2	3	Good	0.0874893	In	88	0.0446723	0.962702
759	DB00916	1	3	2	3	Good	0.0873765	In	36	0.312432	0.672522
1574	DB08864	1	3	3	3	Good	0.0822739	In	80	0.0474114	0.952021
1679	DB09080	1	3	3	3	Good	0.0822739	In	80	0.0474114	0.952021
1651	DB09041	1	3	3	3	Good	0.082171	In	102	0.0414886	0.897128
1934	DB11145	1	3	3	3	Good	0.082171	In	102	0.0414886	0.897128
1750	DB09205	1	3	3	3	Good	0.0818519	In	50	0	1
2309	DB13848	1	3	3	3	Good	0.0818519	In	50	0	1
1695	DB09096	1	3	3	3	Good	0.0763857	In	74	0.0122836	0.969404
1753	DB09212	1	3	3	3	Good	0.0763857	In	74	0.0122836	0.969404
1375	DB05389	1	3	3	3	Good	0.0745881	In	83	0.0525424	0.832564
10	DB00104	1	3	2	3	Good	0.0743174	In	97	0.174356	0.86904
394	DB00530	1	3	3	3	Good	0.0727213	In	80	0.0480649	0.95029
1565	DB08820	1	3	3	3	Good	0.0727213	In	80	0.0480649	0.95029
126	DB00247	1	3	2	3	Good	0.0727141	In	97	0.2314	0.797977
2163	DB12473	1	3	2	3	Good	0.0717314	In	51	0.287118	0.70711
1080	DB01260	1	3	2	3	Good	0.0710862	In	127	0.0992636	0.831485
1911	DB11096	1	3	3	3	Good	0.0709468	In	86	0.0469718	0.955538
660	DB00809	1	3	2	3	Good	0.0694037	In	62	0.276286	0.730094
145	DB00266	1	3	3	3	Good	0.0688525	In	102	0.0873779	0.785712
2368	DB14083	1	3	3	3	Good	0.0688525	In	102	0.0873779	0.785712
381	DB00515	1	3	3	3	Good	0.0667132	In	98	0.0399242	0.844529
2276	DB13323	1	3	3	3	Good	0.0667132	In	98	0.0399242	0.844529
541	DB00682	1	3	3	3	Good	0.0664317	In	102	0.0411454	0.90338
962	DB01136	1	3	3	3	Good	0.0636072	In	66	0.0502795	0.945936
1357	DB05016	1	3	2	3	Good	0.0632069	In	77	0.405448	0.746728
2247	DB13231	1	3	3	3	Good	0.0629826	In	84	0.0293203	0.882633
2445	DB14518	1	3	3	3	Good	0.0629826	In	84	0.0293203	0.882633
782	DB00941	1	3	3	3	Good	0.062366	In	66	0.0899644	0.926284
1747	DB09183	1	3	3	3	Good	0.0583403	In	94	0.0460282	0.957783
138	DB00259	1	3	3	3	Good	0.0569585	In	87	0	1
494	DB00634	1	3	3	3	Good	0.0569585	In	87	0	1
984	DB01158	1	3	3	3	Good	0.0569585	In	87	0	1
1012	DB01187	1	3	3	3	Good	0.0569585	In	87	0	1
2225	DB13154	1	3	3	3	Good	0.0569585	In	87	0	1
572	DB00715	1	3	3	3	Good	0.0566623	In	66	0.100351	0.895978
2462	DB14569	1	3	2	3	Good	0.0550948	In	97	0.231153	0.799863
2267	DB13277	1	3	3	3	Good	0.0541146	In	122	0.0929383	0.825131
2553	DB15982	1	3	3	3	Good	0.0537579	In	66	0.0512938	0.9442
61	DB00180	1	3	2	3	Good	0.0528856	In	127	0.0957602	0.83646
694	DB00846	1	3	2	3	Good	0.0528856	In	127	0.0957602	0.83646
1046	DB01222	1	3	2	3	Good	0.0528856	In	127	0.0957602	0.83646
2337	DB13955	1	3	3	3	Good	0.0520812	In	102	0.0410438	0.909158
1969	DB11231	1	3	3	3	Good	0.0503013	In	82	0.0171619	0.934426
414	DB00551	1	3	3	3	Good	0.0470731	In	36	0.199277	0.718346
843	DB01005	1	3	3	3	Good	0.0470731	In	36	0.199277	0.718346
985	DB01159	1	3	3	3	Good	0.0450646	In	61	0	1
1701	DB09110	1	3	3	3	Good	0.0450646	In	61	0	1
2545	DB15819	1	3	3	3	Good	0.0450646	In	61	0	1
1467	DB06699	1	3	2	3	Good	0.0392409	In	18	0.290682	0.784389
554	DB00695	1	3	2	3	Good	0.0364389	In	27	0.490346	0.677501
2361	DB14019	1	3	3	3	Good	0.0361318	In	80	0.102155	0.888538
453	DB00591	1	3	2	3	Good	0.0359259	In	127	0.0924956	0.841149
2219	DB13136	1	3	3	3	Good	0.0320819	In	102	0.0851255	0.796999
971	DB01145	1	3	2	3	Good	0.0307208	In	12	0.201312	0.795018
421	DB00558	1	3	2	3	Good	0.028033	In	79	0.275166	0.729989
1097	DB01291	1	3	2	3	Good	0.028033	In	79	0.275166	0.729989
1458	DB06663	1	3	3	3	Good	0.0270695	In	66	0.0543827	0.939498
922	DB01092	1	3	2	3	Good	0.0231686	In	127	0.09004	0.844712
2058	DB11677	1	3	3	3	Good	0.0220452	In	82	0.0227582	0.913043
1687	DB09088	1	3	3	3	Good	0.0206121	In	86	0.0703977	0.906369
908	DB01078	1	3	2	3	Good	0.0200844	In	127	0.0894463	0.845577
1306	DB04812	1	3	3	3	Good	0.019516	In	116	0.0782815	0.787451
519	DB00659	1	3	3	3	Good	0.018781	In	84	0.020608	0.914527
536	DB00677	1	3	3	3	Good	0.018781	In	84	0.020608	0.914527
1955	DB11189	1	3	3	3	Good	0.018781	In	84	0.020608	0.914527
1964	DB11210	1	3	3	3	Good	0.018781	In	84	0.020608	0.914527
2478	DB14650	1	3	3	3	Good	0.0183344	In	93	0.0856707	0.828581
2177	DB12602	1	3	2	3	Good	0.0174644	In	97	0.176938	0.861344
974	DB01148	1	3	3	3	Good	0.0163508	In	86	0.117269	0.863444
1572	DB08842	1	3	3	3	Good	0.0140284	In	82	0.024346	0.906977
1326	DB04842	1	3	3	3	Good	0.0120775	In	66	0.10083	0.888394
2507	DB14989	1	3	3	3	Good	0.00978866	In	66	0.0899237	0.926424
2358	DB14007	1	3	3	3	Good	0.00958531	In	82	0.0252259	0.903614
952	DB01125	1	3	3	3	Good	0.00814626	In	76	0.0811542	0.842678
249	DB00374	1	3	3	3	Good	0.00544198	In	74	0.0410544	0.90723
1223	DB01626	1	3	3	3	Good	0.00501999	In	111	7.92e-15	1
1265	DB03255	1	3	3	3	Good	0.00501999	In	111	0	1
1313	DB04822	1	3	3	3	Good	0.00501999	In	111	7.92e-15	1
1542	DB06819	1	3	3	3	Good	0.00501999	In	111	7.92e-15	1
1770	DB09269	1	3	3	3	Good	0.00501999	In	111	7.92e-15	1
2241	DB13218	1	3	3	3	Good	0.00501999	In	111	7.92e-15	1
2390	DB14175	1	3	3	3	Good	0.00501999	In	111	7.92e-15	1
2397	DB14184	1	3	3	3	Good	0.00501999	In	111	7.92e-15	1
837	DB00999	1	3	3	3	Good	0.00280018	In	93	0.102138	0.742765
2302	DB13766	1	3	3	3	Good	-0.00302028	In	66	0.0583808	0.934195
495	DB00635	1	3	2	3	Good	-0.00411789	In	127	0.0847877	0.852433
597	DB00741	1	3	2	3	Good	-0.00411789	In	127	0.0847877	0.852433
707	DB00860	1	3	2	3	Good	-0.00411789	In	127	0.0847877	0.852433
1273	DB03756	1	3	3	3	Good	-0.00590541	In	82	0.0282939	0.891892
1590	DB08887	1	3	3	3	Good	-0.00590541	In	82	0.0282939	0.891892
2104	DB11936	1	3	3	3	Good	-0.00590541	In	82	0.0282939	0.891892
108	DB00228	1	3	3	3	Good	-0.00953567	In	84	0.0150267	0.936199
609	DB00753	1	3	3	3	Good	-0.00953567	In	84	0.0150267	0.936199
1393	DB06151	1	3	3	3	Good	-0.00953567	In	84	0.0150267	0.936199
1545	DB06823	1	3	3	3	Good	-0.00953567	In	84	0.0150267	0.936199
1873	DB09501	1	3	3	3	Good	-0.00953567	In	84	0.0150267	0.936199
2538	DB15679	1	3	3	3	Good	-0.00953567	In	84	0.0150267	0.936199
462	DB00600	1	3	3	3	Good	-0.0129968	In	74	0.041222	0.898838
940	DB01113	1	3	3	3	Good	-0.0161581	In	66	0.0602718	0.93188
860	DB01022	1	3	3	3	Good	-0.0179283	In	106	0.0219457	0.940708
46	DB00159	1	3	3	3	Good	-0.0185106	In	82	0.0307905	0.882353
446	DB00583	1	3	3	3	Good	-0.0185106	In	82	0.0307905	0.882353
410	DB00547	1	3	2	3	Good	-0.0217371	In	127	0.0813962	0.857495
546	DB00687	1	3	2	3	Good	-0.0217371	In	127	0.0813962	0.857495
799	DB00959	1	3	2	3	Good	-0.0217371	In	127	0.0813962	0.857495
1631	DB08971	1	3	2	3	Good	-0.0217371	In	127	0.0813962	0.857495
1824	DB09378	1	3	2	3	Good	-0.0217371	In	127	0.0813962	0.857495
1827	DB09383	1	3	2	3	Good	-0.0217371	In	127	0.0813962	0.857495
2205	DB12952	1	3	2	3	Good	-0.0217371	In	127	0.0813962	0.857495
2487	DB14703	1	3	3	3	Good	-0.0225262	In	107	0.0838922	0.835465
1002	DB01177	1	3	3	3	Good	-0.0230196	In	94	0.0891779	0.927275
2052	DB11644	1	3	2	3	Good	-0.0231766	In	27	0.498927	0.627076
1559	DB08809	1	3	3	3	Good	-0.0238803	In	61	0.0135621	0.945691
1843	DB09413	1	3	3	3	Good	-0.0238803	In	61	0.0135621	0.945691
1846	DB09418	1	3	3	3	Good	-0.0238803	In	61	0.0135621	0.945691
1853	DB09449	1	3	3	3	Good	-0.0238803	In	61	0.0135621	0.945691
1854	DB09460	1	3	3	3	Good	-0.0238803	In	61	0.0135621	0.945691
2346	DB13977	1	3	3	3	Good	-0.0238803	In	61	0.0135621	0.945691
164	DB00287	1	3	3	3	Good	-0.024277	In	106	0.0206673	0.943968
422	DB00559	1	3	2	3	Good	-0.0301111	In	97	0.177334	0.852201
25	DB00132	1	3	3	3	Good	-0.0335555	In	82	0.0337702	0.870968
813	DB00974	1	3	3	3	Good	-0.0335555	In	82	0.0337702	0.870968
1262	DB03193	1	3	3	3	Good	-0.0335555	In	82	0.0337702	0.870968
1287	DB04224	1	3	3	3	Good	-0.0335555	In	82	0.0337702	0.870968
1882	DB09531	1	3	3	3	Good	-0.0335555	In	82	0.0337702	0.870968
2312	DB13854	1	3	3	3	Good	-0.0335555	In	82	0.0337702	0.870968
2374	DB14104	1	3	3	3	Good	-0.0335555	In	82	0.0337702	0.870968
1583	DB08875	1	3	3	3	Good	-0.035336	In	94	0.0889219	0.929112
2111	DB11967	1	3	2	3	Good	-0.0370009	In	117	0.242228	0.812719
315	DB00443	1	3	2	3	Good	-0.0380011	In	127	0.0782655	0.862221
480	DB00620	1	3	2	3	Good	-0.0380011	In	127	0.0782655	0.862221
1057	DB01234	1	3	2	3	Good	-0.0380011	In	127	0.0782655	0.862221
1694	DB09095	1	3	2	3	Good	-0.0380011	In	127	0.0782655	0.862221
1644	DB09027	1	3	3	3	Good	-0.0402786	In	94	0.10502	0.882165
467	DB00605	1	3	3	3	Good	-0.0410515	In	116	0.0707431	0.803108
416	DB00553	1	3	3	3	Good	-0.0421885	In	116	0.0871324	0.808711
2341	DB13966	1	3	3	3	Good	-0.0422254	In	82	0.0354873	0.864407
70	DB00189	1	3	3	3	Good	-0.0437109	In	84	0.00829058	0.963763
137	DB00258	1	3	3	3	Good	-0.0437109	In	84	0.00829058	0.963763
518	DB00658	1	3	3	3	Good	-0.0437109	In	84	0.00829058	0.963763
706	DB00859	1	3	3	3	Good	-0.0437109	In	84	0.00829058	0.963763
1836	DB09400	1	3	3	3	Good	-0.0437109	In	84	0.00829058	0.963763
1933	DB11142	1	3	3	3	Good	-0.0437109	In	84	0.00829058	0.963763
2353	DB13996	1	3	3	3	Good	-0.0437109	In	84	0.00829058	0.963763
2426	DB14487	1	3	3	3	Good	-0.0437109	In	84	0.00829058	0.963763
1038	DB01214	1	3	3	3	Good	-0.0500815	In	50	0.0463545	0.957416
1276	DB03796	1	3	3	3	Good	-0.0518243	In	82	0.0373884	0.857143
103	DB00223	1	3	2	3	Good	-0.0530603	In	127	0.0753668	0.866643
523	DB00663	1	3	2	3	Good	-0.0530603	In	127	0.0753668	0.866643
2168	DB12499	1	3	2	3	Good	-0.0530603	In	127	0.0753668	0.866643
522	DB00662	1	3	3	3	Good	-0.0530935	In	64	0.0466587	0.953756
2244	DB13222	1	3	3	3	Good	-0.0531241	In	116	0.0694064	0.806304
1359	DB05039	1	3	3	3	Good	-0.0543427	In	94	0.0886843	0.931962
436	DB00573	1	3	3	3	Good	-0.0555477	In	63	0.0411808	0.904834
1494	DB06751	1	3	3	3	Good	-0.0592121	In	80	0.0661315	0.916446
884	DB01051	1	3	3	3	Good	-0.0622447	In	80	0.0662954	0.915916
339	DB00470	1	3	3	3	Good	-0.0655017	In	76	0.0661719	0.867885
2011	DB11387	1	3	3	3	Good	-0.0665417	In	139	0.0397539	0.826939
2307	DB13813	1	3	3	3	Good	-0.0665417	In	139	0.0397539	0.826939
847	DB01009	1	3	3	3	Good	-0.0666368	In	63	0.0389345	0.909556
1634	DB08981	1	3	3	3	Good	-0.0666368	In	63	0.0389345	0.909556
1755	DB09214	1	3	3	3	Good	-0.0666368	In	63	0.0389345	0.909556
2113	DB11979	1	3	3	3	Good	-0.0680982	In	64	0.0664851	0.914915
1570	DB08827	1	3	3	3	Good	-0.0683263	In	94	0.0886322	0.93407
1604	DB08909	1	3	3	3	Good	-0.0717397	In	63	0.0379009	0.911745
1734	DB09151	1	3	3	3	Good	-0.0718486	In	122	0.0599536	0.861064
1296	DB04571	1	3	3	3	Good	-0.0728604	In	116	0.0816845	0.816995
521	DB00661	1	3	3	3	Good	-0.0730298	In	64	0.0478063	0.950042
1497	DB06756	1	3	3	3	Good	-0.0744776	In	129	0.0384373	0.824176
2440	DB14507	1	3	3	3	Good	-0.0744776	In	129	0.0384373	0.824176
2262	DB13268	1	3	3	3	Good	-0.0749749	In	85	0	1
1710	DB09121	1	3	2	3	Good	-0.0768554	In	127	0.0784737	0.861905
2125	DB12070	1	3	3	3	Good	-0.0781755	In	94	0.0886581	0.932477
1355	DB05013	1	3	2	3	Good	-0.080063	In	127	0.0701691	0.874688
2453	DB14540	1	3	2	3	Good	-0.080063	In	127	0.0701691	0.874688
2508	DB15011	1	3	3	3	Good	-0.087524	In	94	0.0887304	0.930965
1423	DB06261	1	3	3	3	Good	-0.0879732	In	129	0.0357794	0.83432
1451	DB06608	1	3	3	3	Good	-0.0913893	In	64	0.0654092	0.918706
2457	DB14544	1	3	2	3	Good	-0.0922142	In	127	0.0678301	0.878357
1448	DB06595	1	3	2	3	Good	-0.0932535	In	88	0.163273	0.831277
[truncated: 376 more rows]

[truncated: 7 more sheets: Chronic_NOEL_Approved, Sub-chronic_LOEL_Approved, Sub-chronic_NOEL_Approved, IM1_PPDB, IM2 _PPDB, IM3_PPDB, IM4_PPDB]
