# Supplementary material for: Chemometric modeling of the lowest observed effect level (LOEL) and no observed effect level (NOEL) for rat toxicity
Source: Royal Society of Chemistry journal article supplement (doi:10.1039/d3va00265a), 2024-01-01
Supplement: d3va00265a2.pdf [file d3va00265a2.pdf]

## **Chemometric Modeling of Lowest Observed Effect Level (LOEL) and No Observed Effect Level (NOEL) for Rat Toxicity**

**Ankur Kumar<sup>a</sup>, Probir Kumar Ojha<sup>a</sup>, Kunal Roy<sup>b\*</sup>**

<sup>a</sup>Drug Discovery and Development Laboratory,  
Department of Pharmaceutical Technology, Jadavpur University,  
Kolkata 700032, India

<sup>b</sup>Drug Theoretics and Cheminformatics (DTC) Laboratory,  
Department of Pharmaceutical Technology, Jadavpur University,  
Kolkata 700032, India

Supplementary Information SI-2

**\*Correspondence to: Kunal Roy ([kunal.roy@jadavpuruniversity.in](mailto:kunal.roy@jadavpuruniversity.in))**

## Materials and methods

### Definition of different statistical parameters

$$R^2 = 1 - \frac{\Sigma(Y_{obs(train)} - Y_{calc(train)})^2}{\Sigma(Y_{obs(train)} - \bar{Y}_{train})^2}$$

$$Q_{LOO}^2 = 1 - \frac{\Sigma(Y_{obs(train)} - Y_{calc(train)})^2}{\Sigma(Y_{obs(train)} - \bar{Y}_{train})^2}$$

Where,  $R^2$  = Co-efficient of determination

$Q_{LOO}^2$  = Cross-validated correlation coefficient

$Y_{obs(train)}$  = Observed response value of training set

$Y_{calc(train)}$  = Calculated response value of training set

$\bar{Y}_{train}$  = Average of all responses of training set

$$Q_{F1}^2 = 1 - \frac{\Sigma(Y_{obs(test)} - Y_{calc(test)})^2}{\Sigma(Y_{obs(test)} - \bar{Y}_{train})^2}$$

$$Q_{F2}^2 = 1 - \frac{\Sigma(Y_{obs(test)} - Y_{calc(test)})^2}{\Sigma(Y_{obs(test)} - \bar{Y}_{test})^2}$$

Where,  $Y_{obs(test)}$  = Observed response value of training set

$Y_{calc(test)}$  = Calculated response value of training set

$\bar{Y}_{train}$  = Average of all response of training set

$\bar{Y}_{test}$  = Average of all response of test set

**Various PLS plot of different QSAR Models. A: Model IM1; B: Model IM2; C: Model IM3; D: Model IM4.**

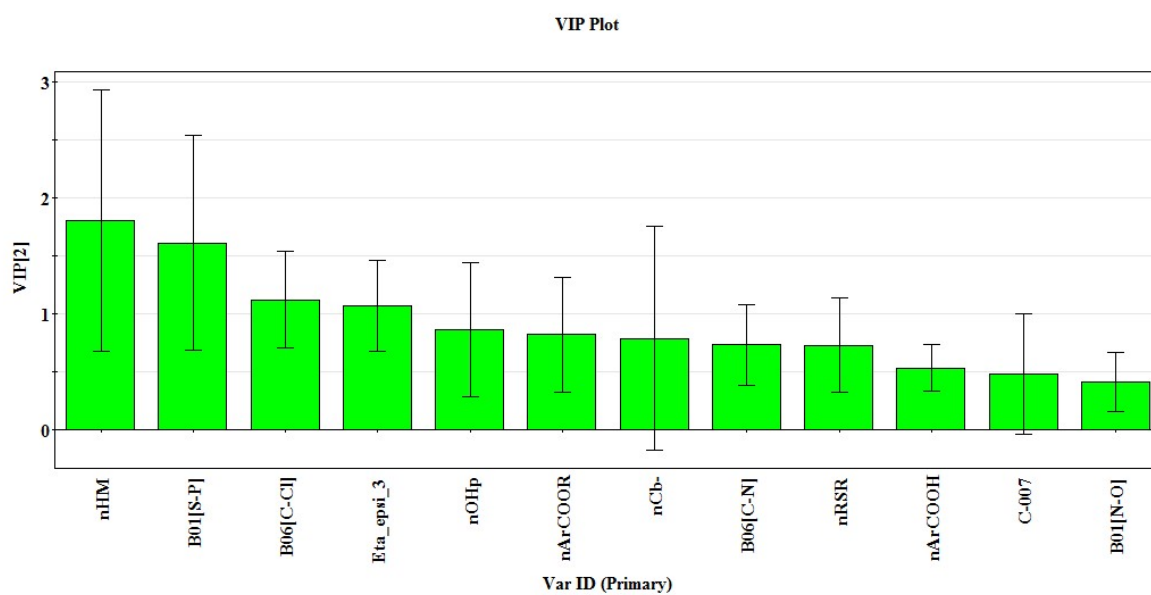

**Fig.S1. VIP plot of Model IM1 (chronic Toxicity; pLOEL endpoint)**

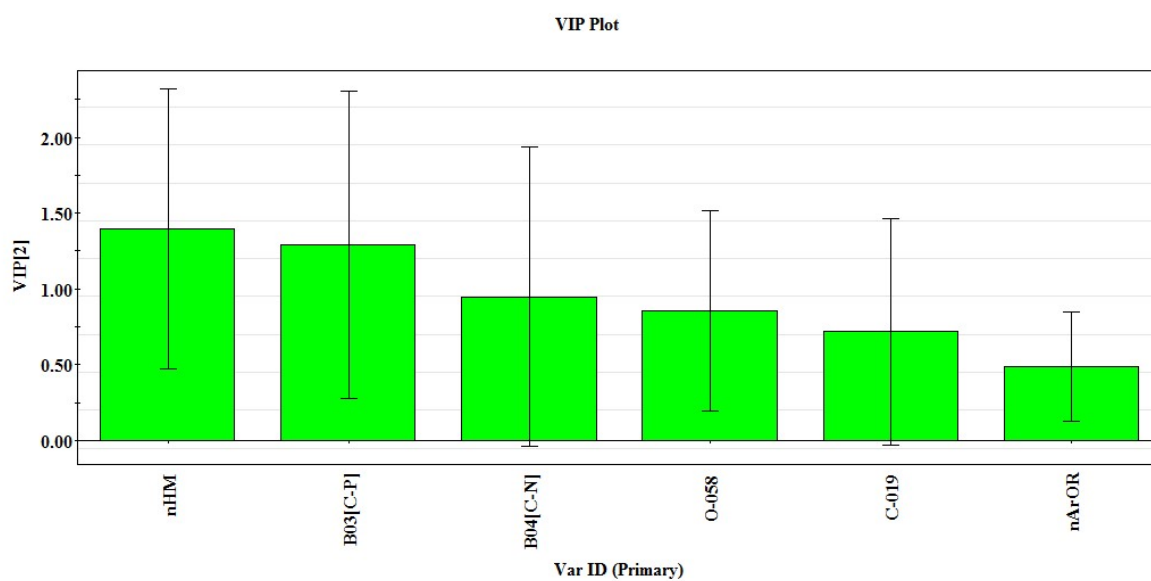

Fig.S2. VIP plot of Model IM2 (chronic Toxicity; pNOEL endpoint)

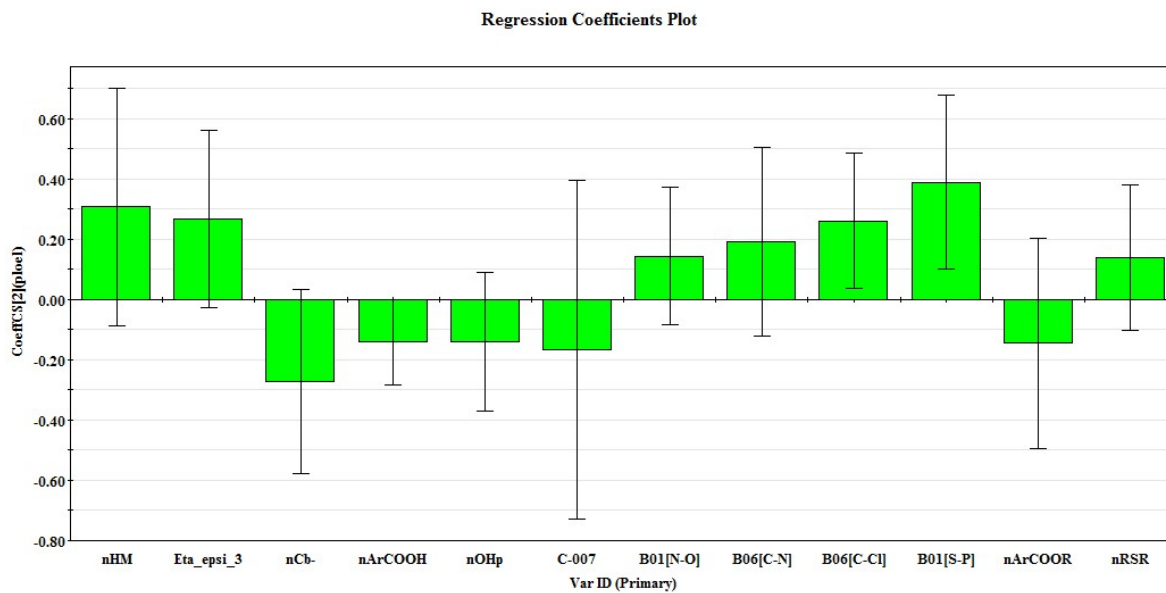

Fig.S3. Regression coefficient plot of Model IM1 (chronic Toxicity; pLOEL endpoint)

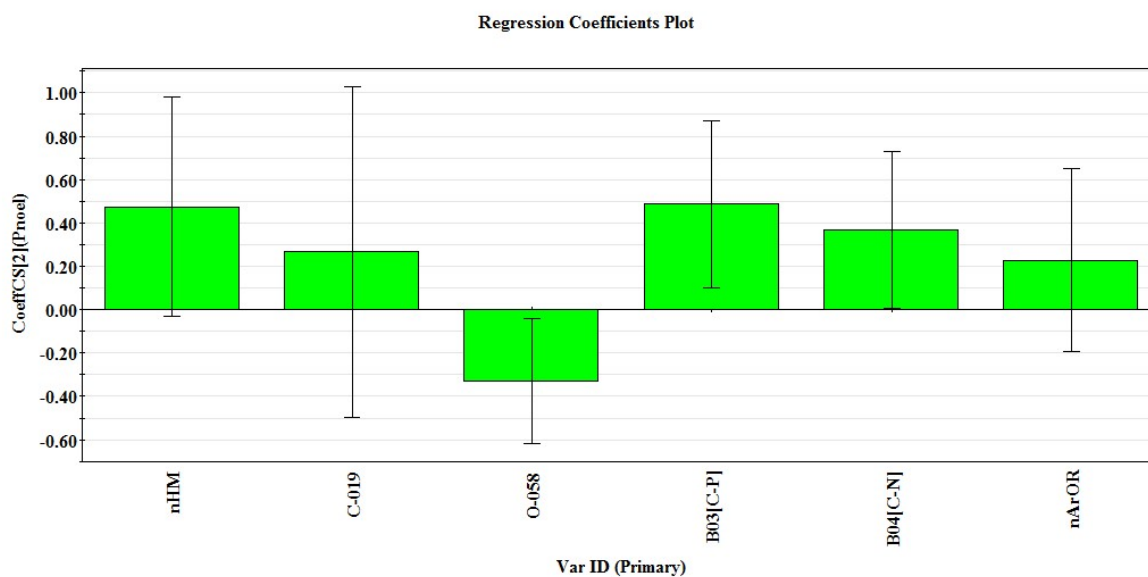

Fig.S4. Regression coefficient plot of Model IM2 (chronic Toxicity; pNOEL endpoint)

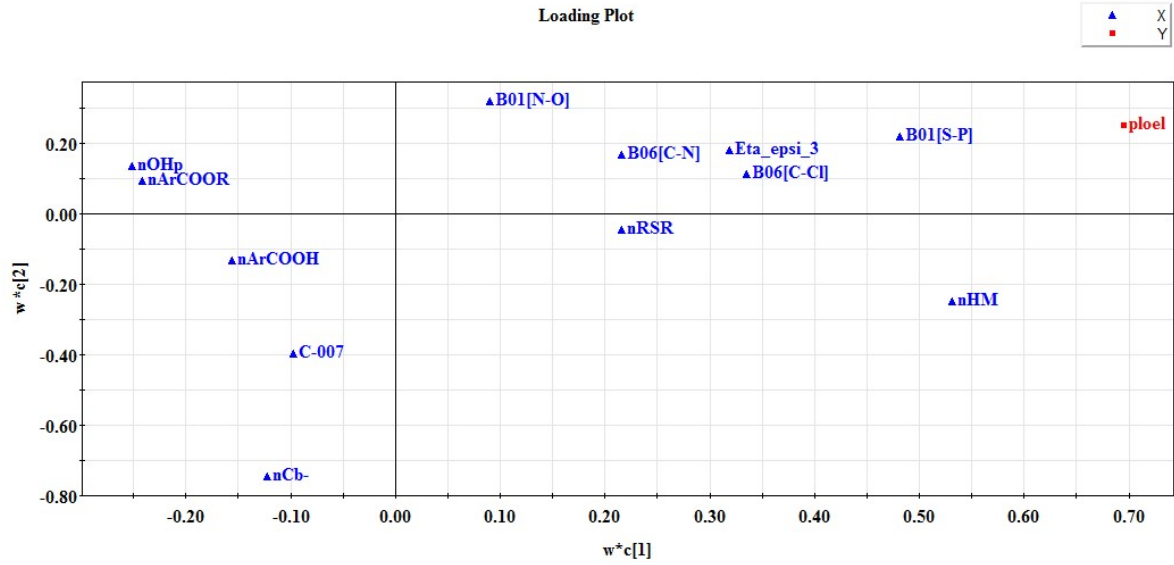

Fig.S5. Loading plot of Model IM1 (chronic Toxicity; pLOEL endpoint)

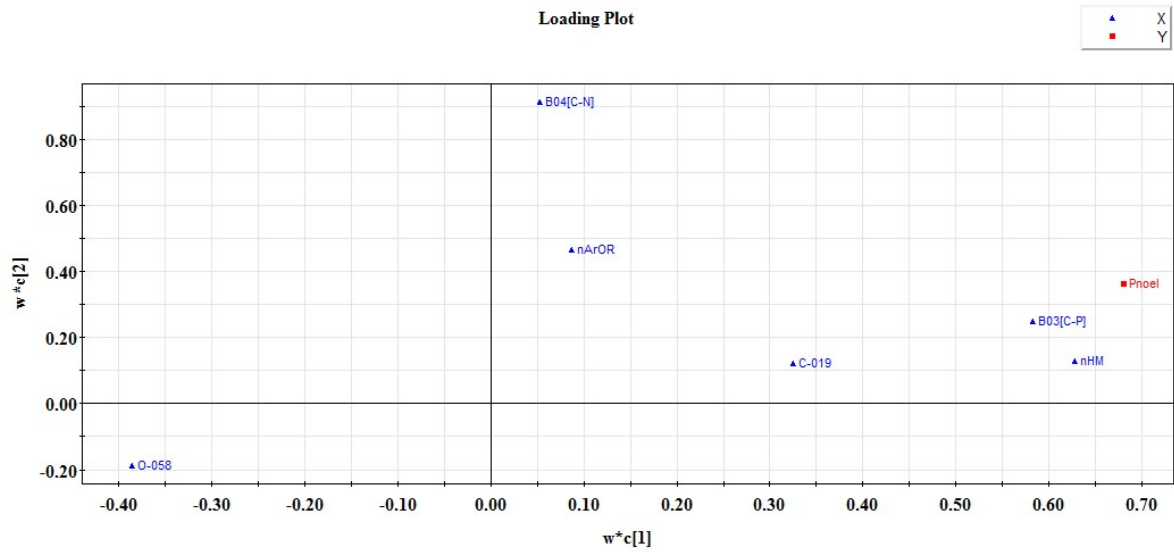

Fig.S6. Loading plot of Model IM2 (chronic Toxicity; pNOEL endpoint)

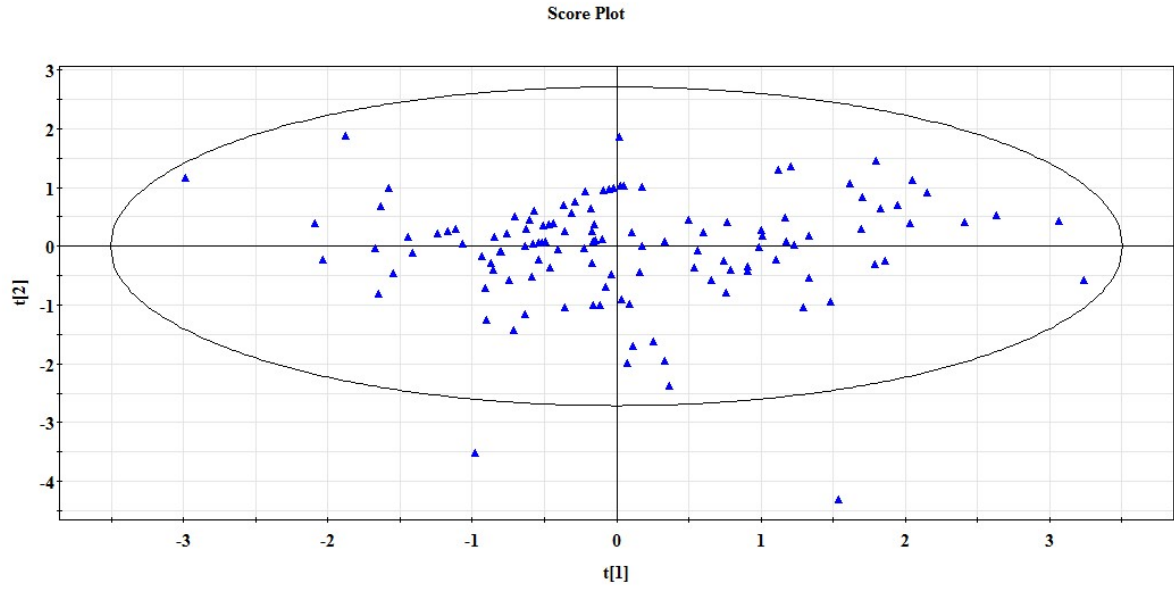

**Fig.S7. Score plot of Model IM1 (chronic Toxicity; pLOEL endpoint)**

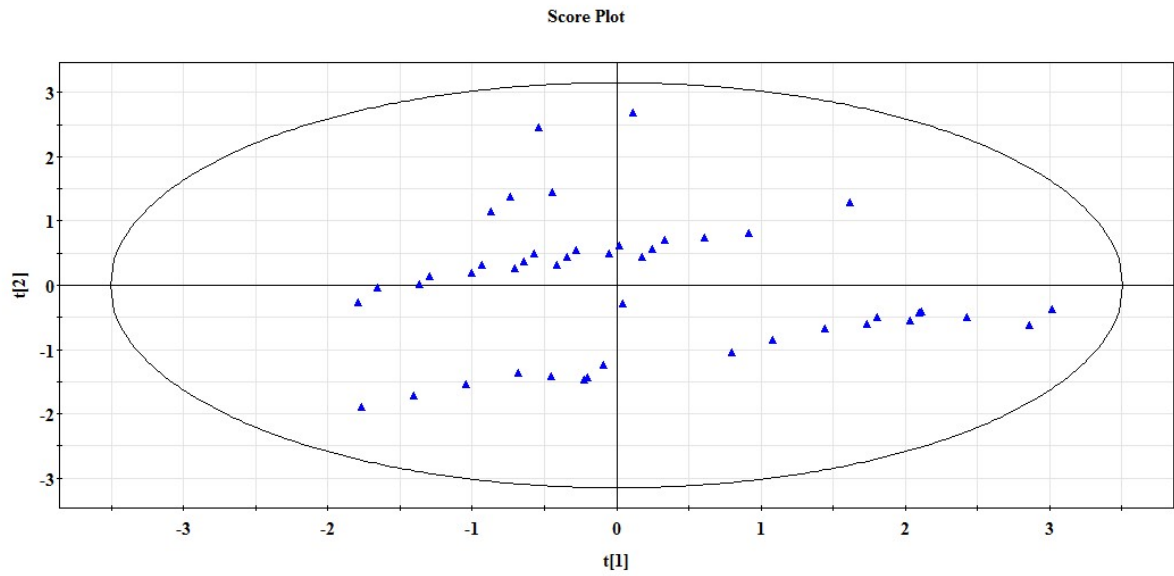

**Fig.S8. Score plot of Model IM2 (chronic Toxicity; pNOEL endpoint)**

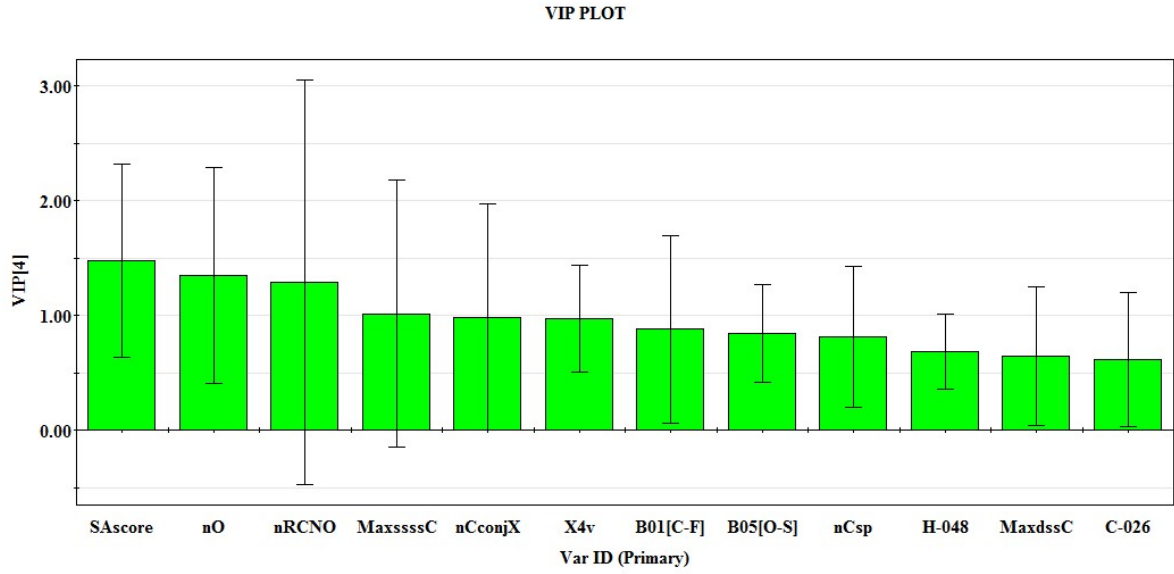

**Fig.S9. VIP plot of Model IM3 (sub-chronic Toxicity; pLOEL endpoint)**

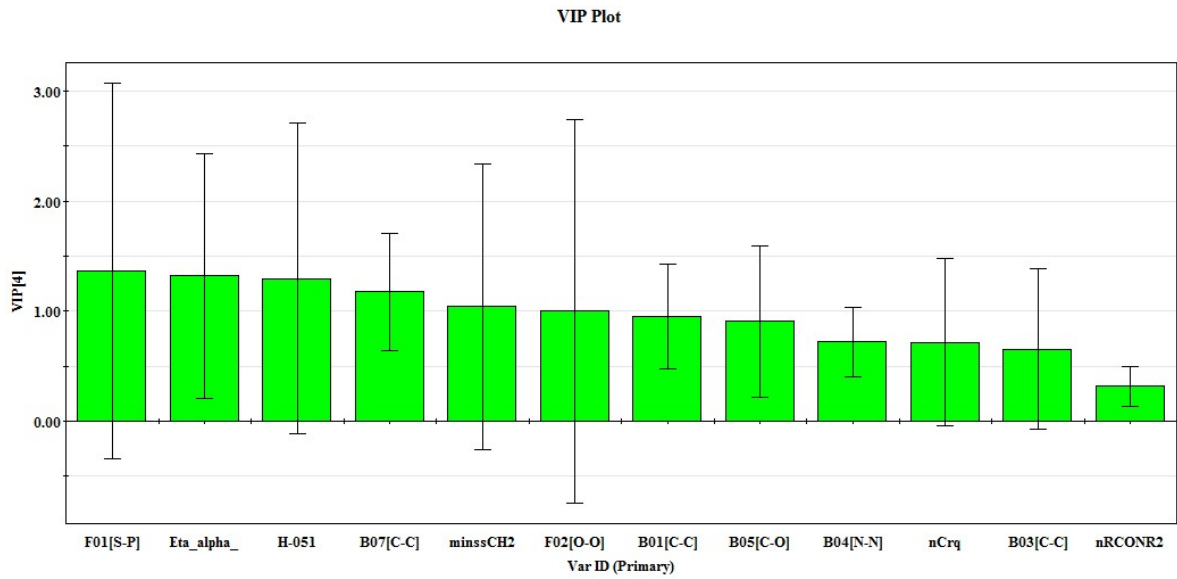

**Fig.S10. VIP plot of Model IM4 (sub-chronic Toxicity; pNOEL endpoint)**

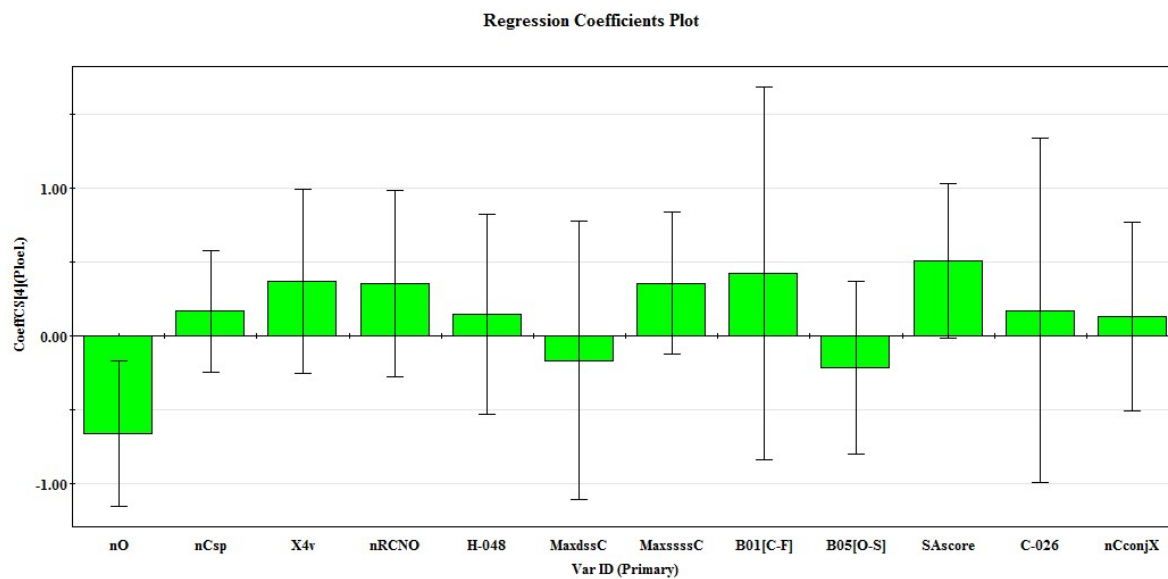

**Fig.S11. Regression coefficient plot of Model IM3 (sub-chronic Toxicity; pLOEL endpoint)**

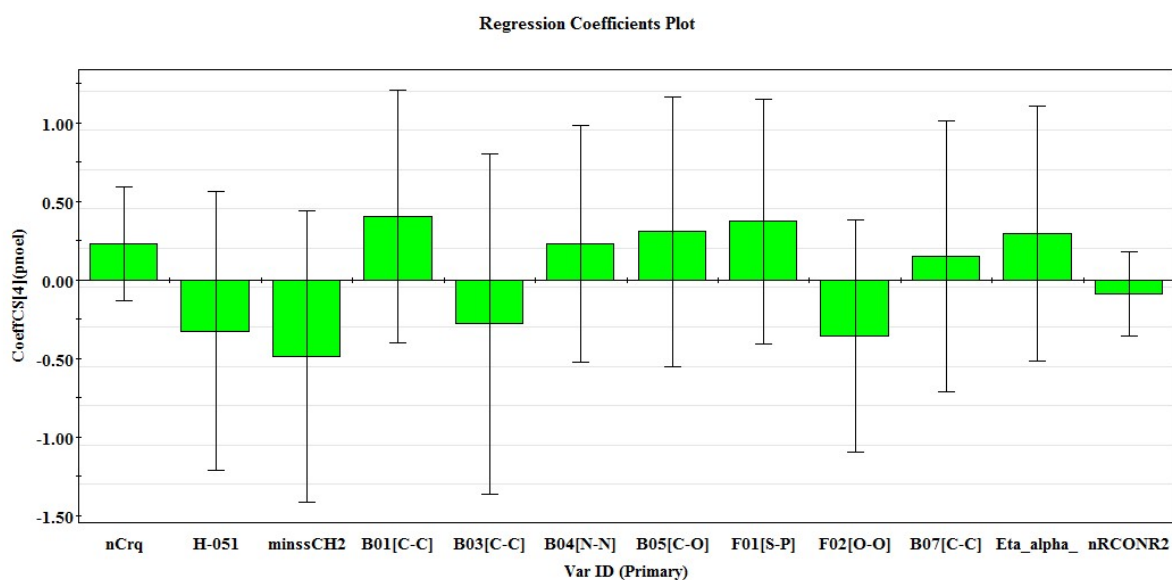

**Fig.S12. Regression coefficient plot of Model IM4 (sub-chronic Toxicity; pNOEL endpoint)**



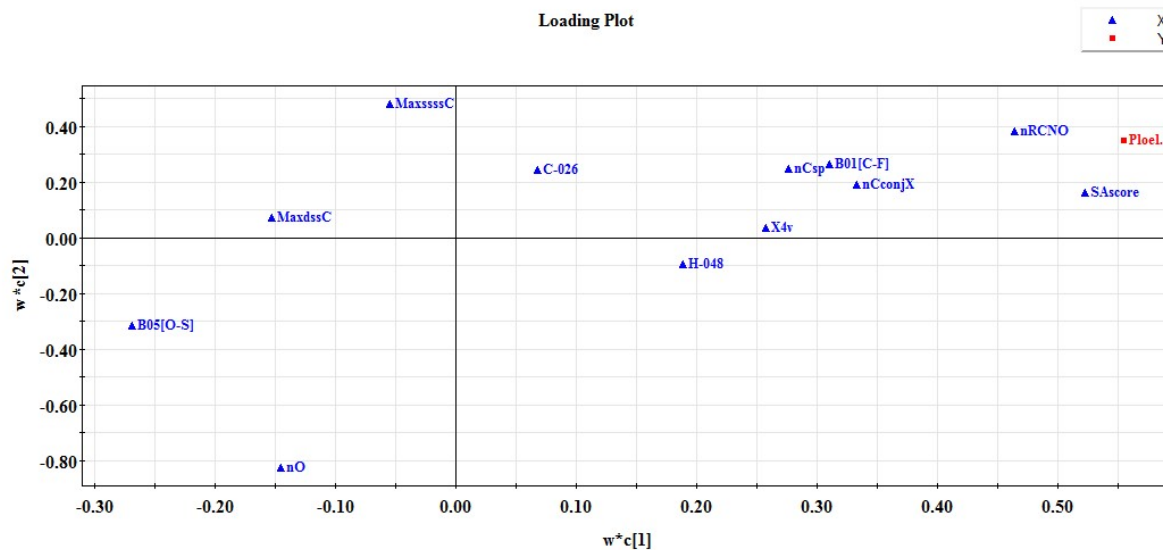

**Fig.S13. Loading plot of Model IM3 (sub-chronic Toxicity; pLOEL endpoint)**

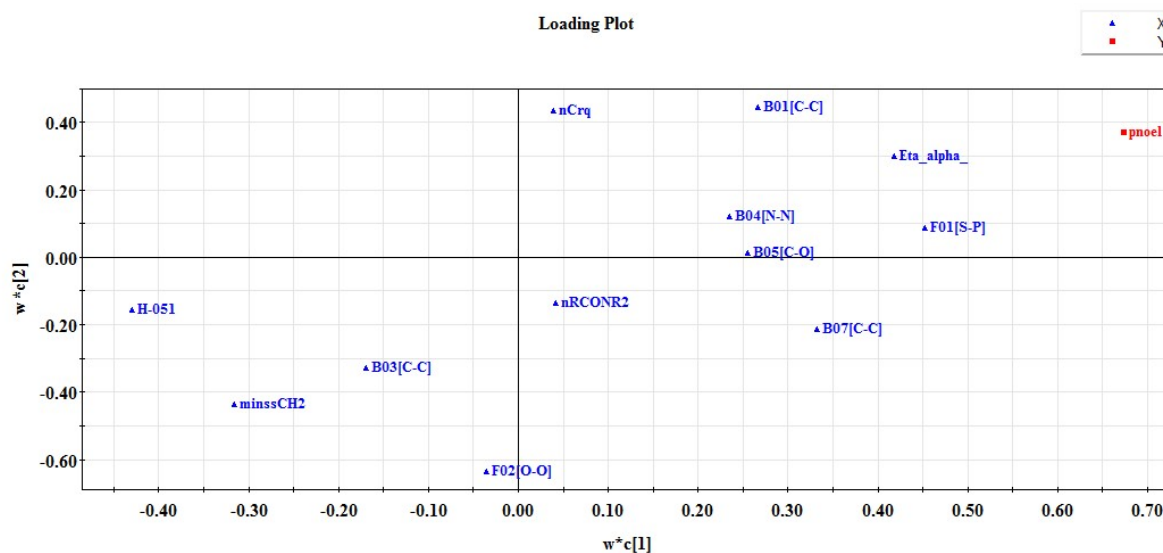

**Fig.S14. Loading plot of Model IM4 (sub-chronic Toxicity; pNOEL endpoint)**

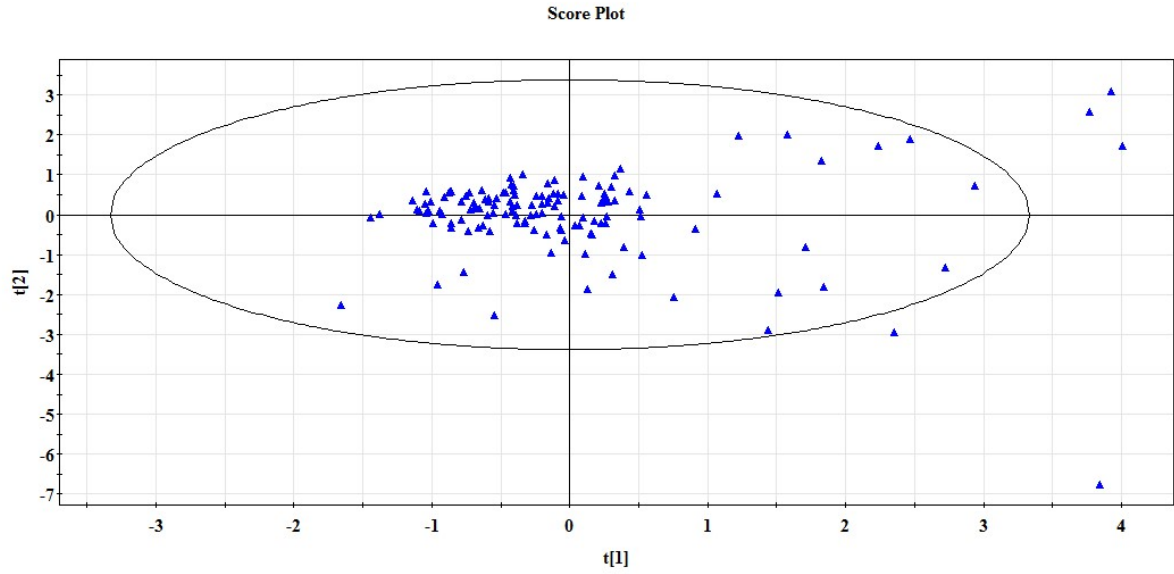

**Fig.S15. Score plot of Model IM3 (sub-chronic Toxicity; pLOEL endpoint)**

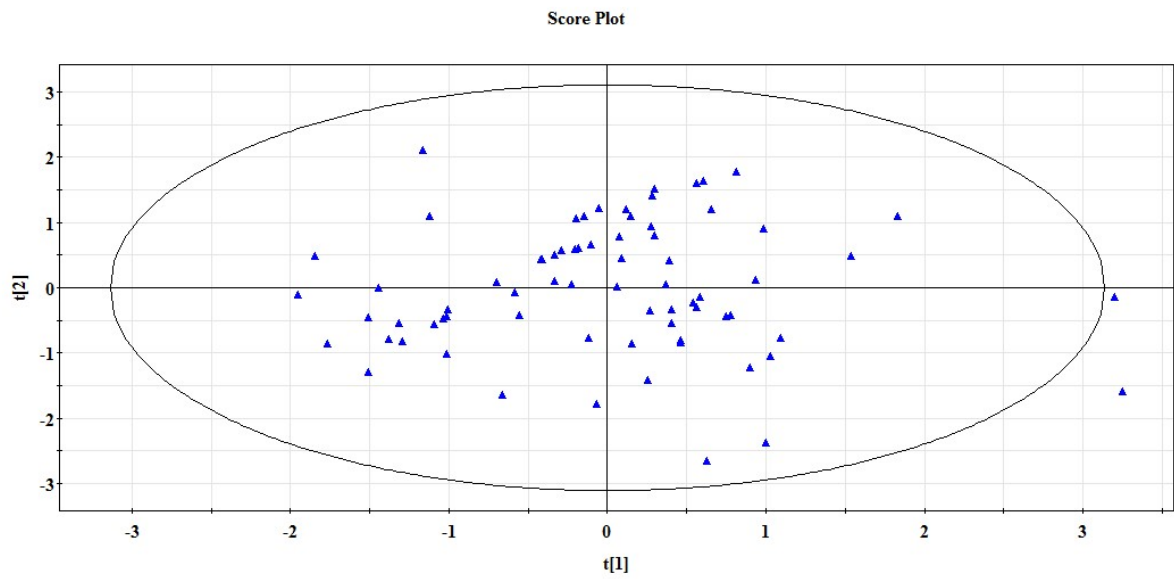

**Fig.S16. Score plot of Model IM4 (sub-chronic Toxicity; pNOEL endpoint)**

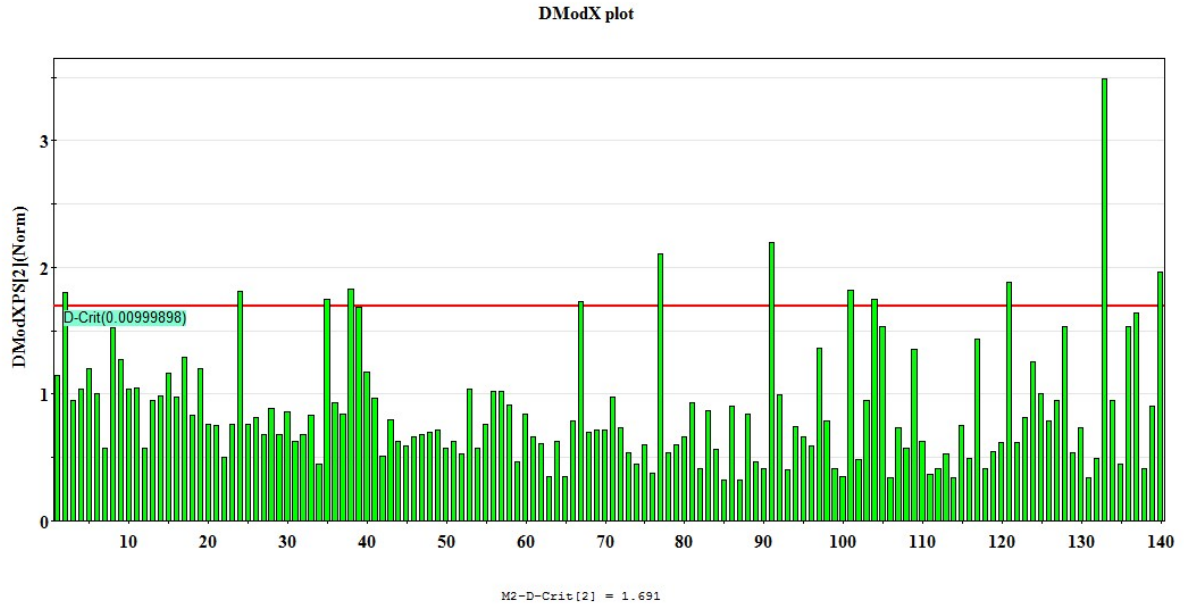

Fig.S17. DModX plot (training set) of Model IM1 (chronic Toxicity; pLOEL endpoint)

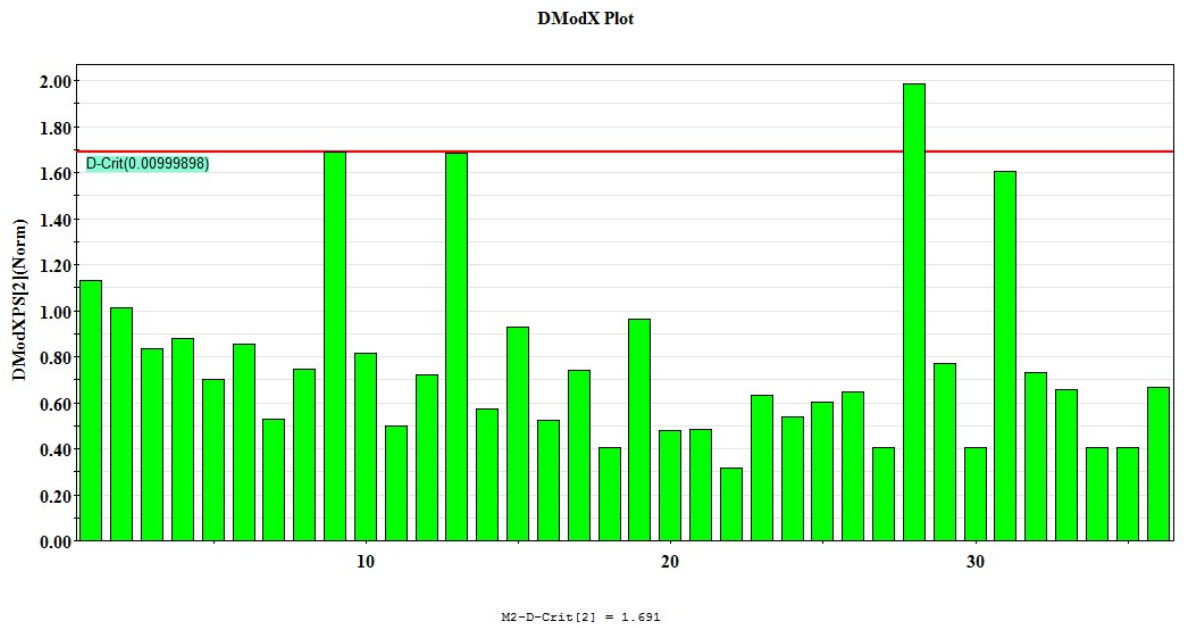

Fig.S18. DModX plot (test set) of Model IM1 (chronic Toxicity; pLOEL endpoint)

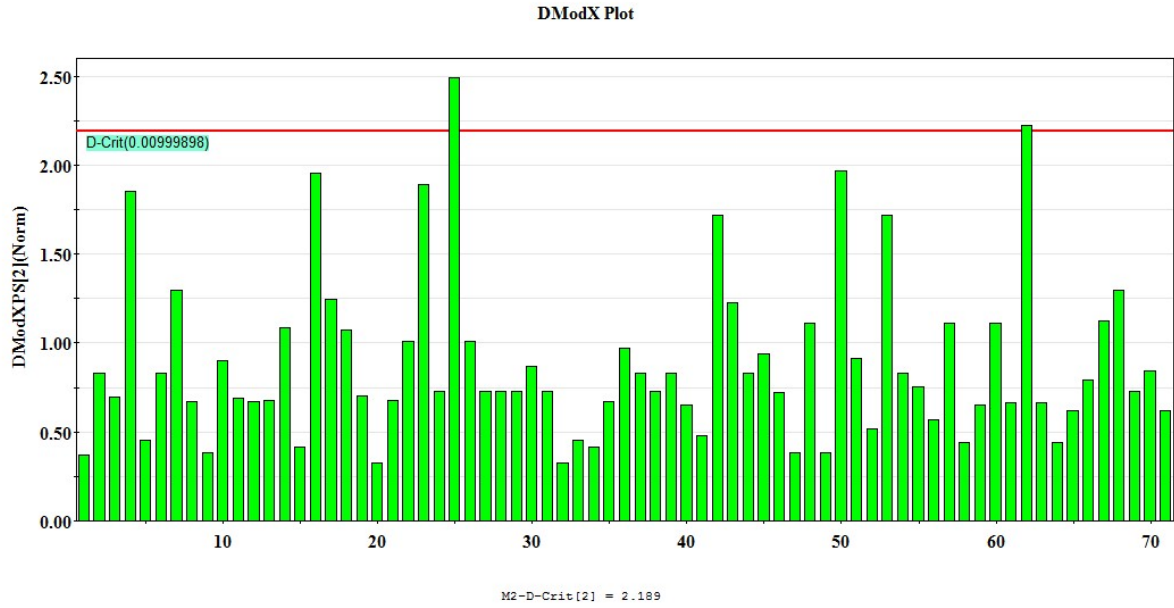

**Fig.S19. DModX plot (training set) of Model IM2 (chronic Toxicity; pNOEL endpoint)**

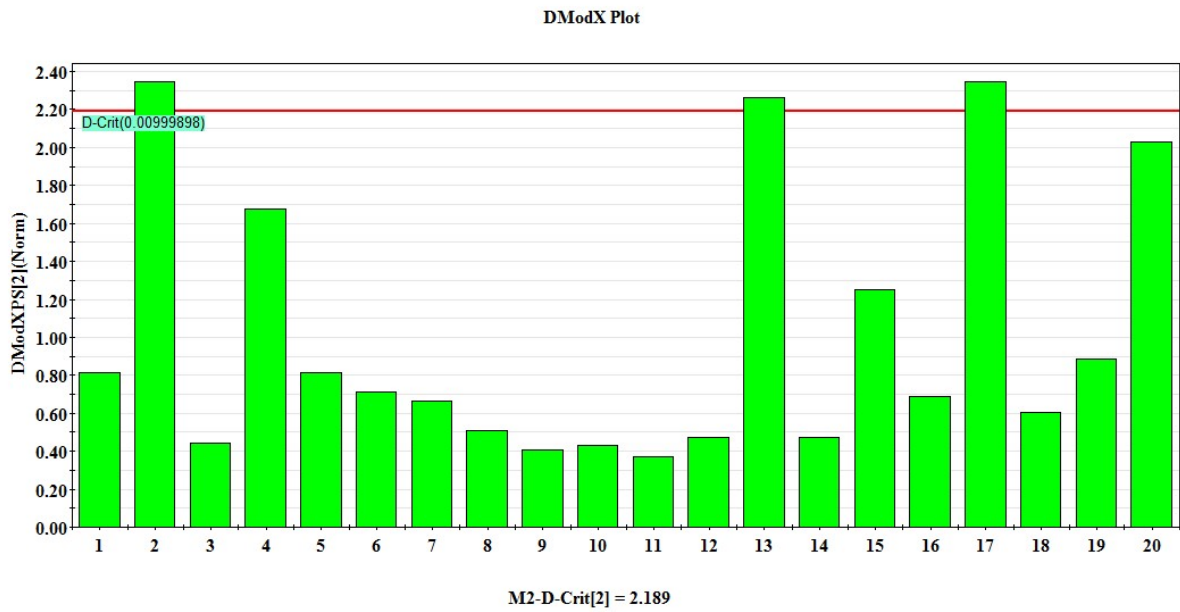

**Fig.S20. DModX plot (test set) of Model IM2**

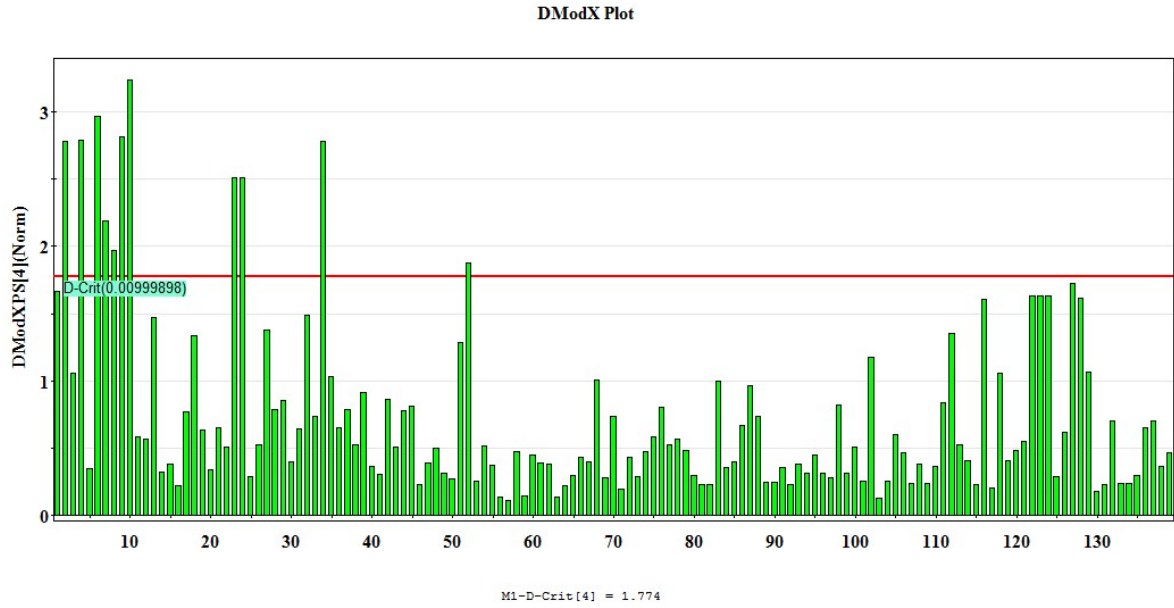

**Fig.S21. DModX plot (training set) of Model IM3 (sub-chronic Toxicity; pLOEL endpoint)**

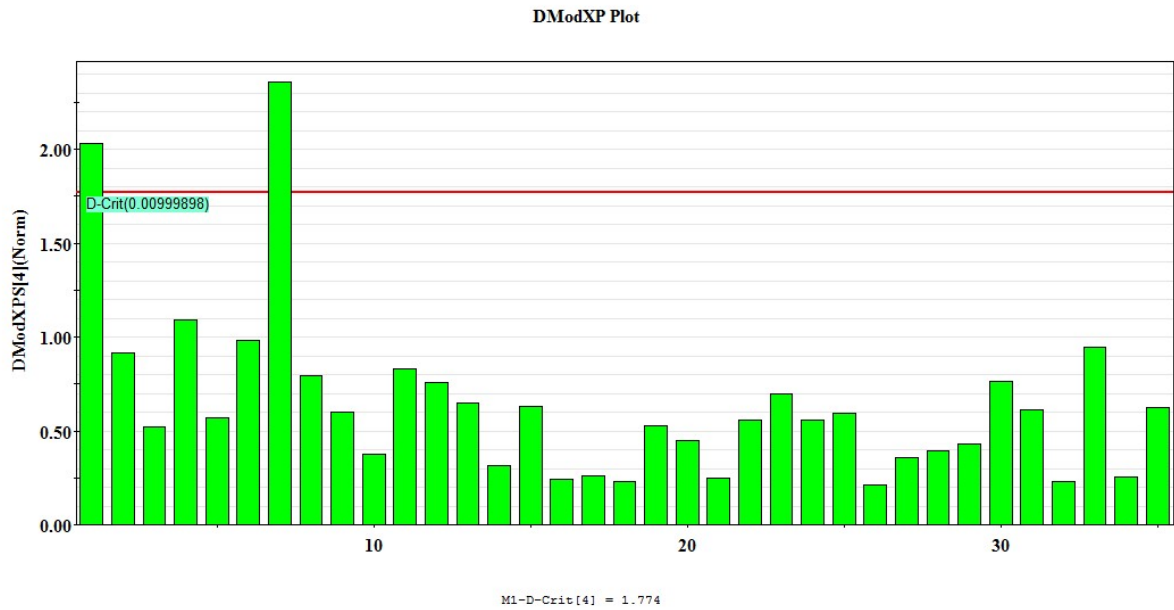

**Fig.S22. DModX plot (test set) of Model IM3(sub-chronic Toxicity; pLOEL endpoint)**

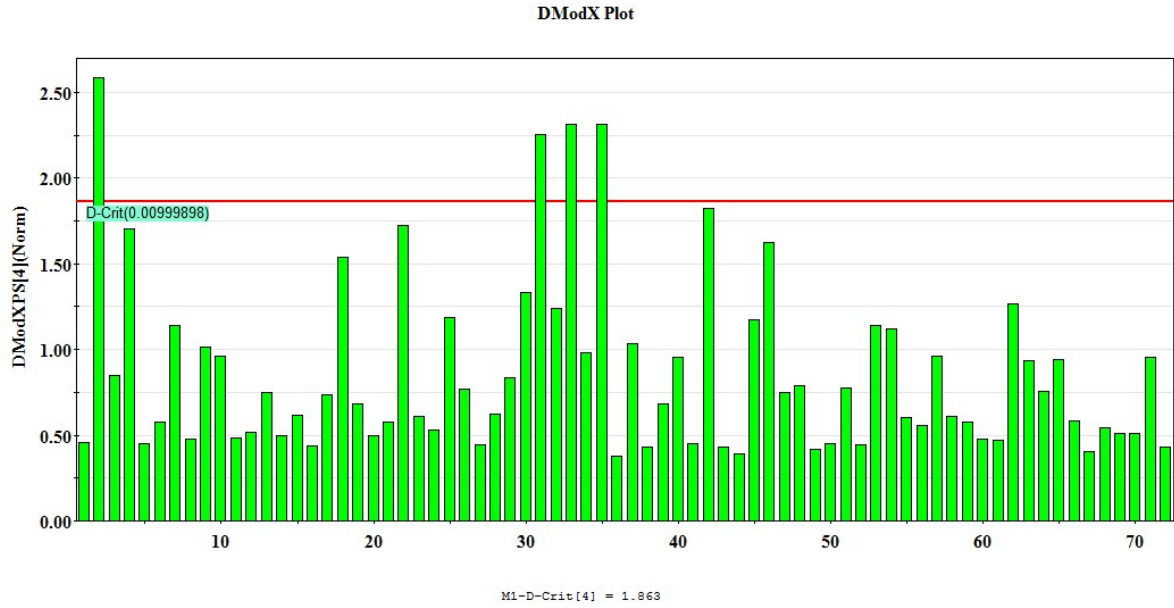

Fig.S23. DModX plot (training set) of Model IM4 (sub-chronic Toxicity; pNOEL endpoint)

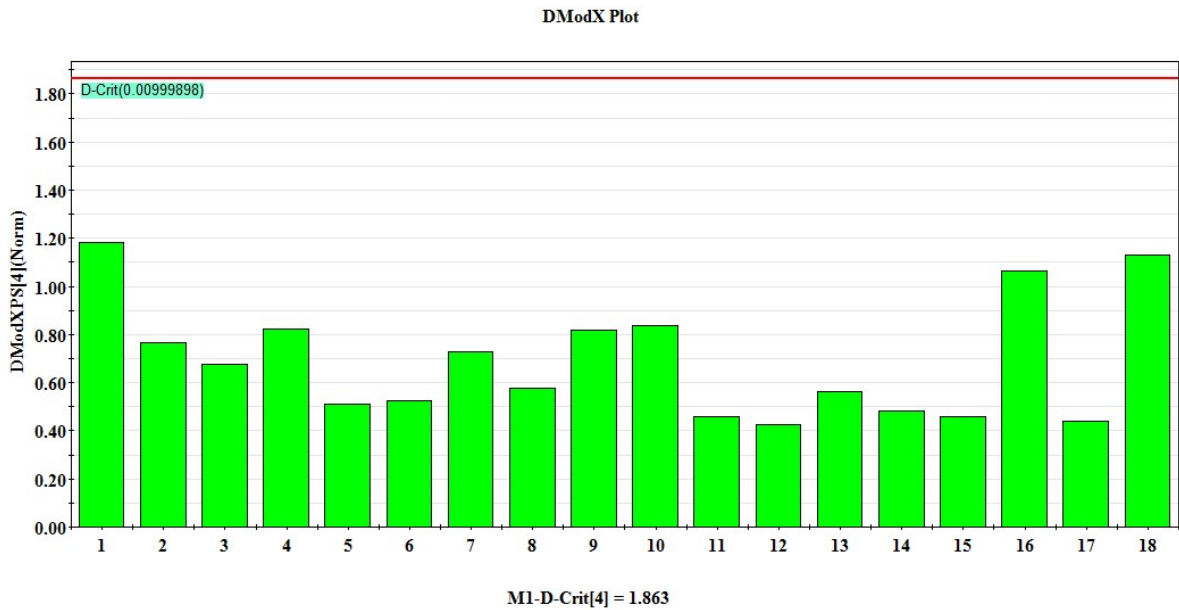

Fig.S24. DModX plot (test set) of Model IM4 (sub-chronic Toxicity; pNOEL endpoint)

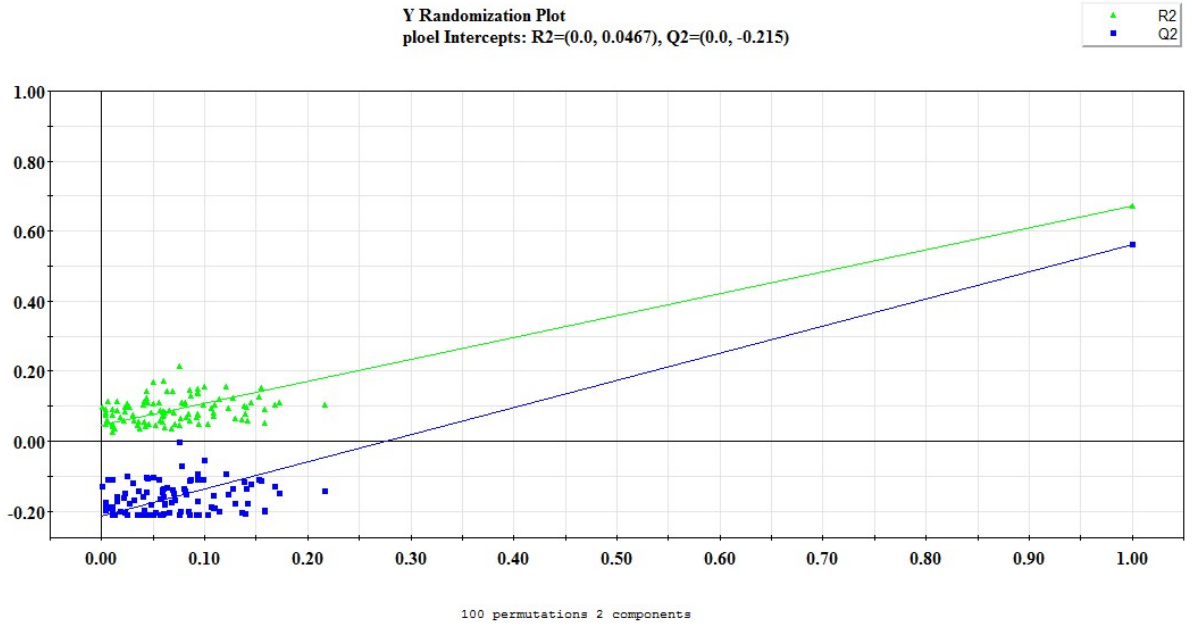

**Fig.S25. Y Randomization plot of Model IM1 (chronic Toxicity; pLOEL endpoint)**

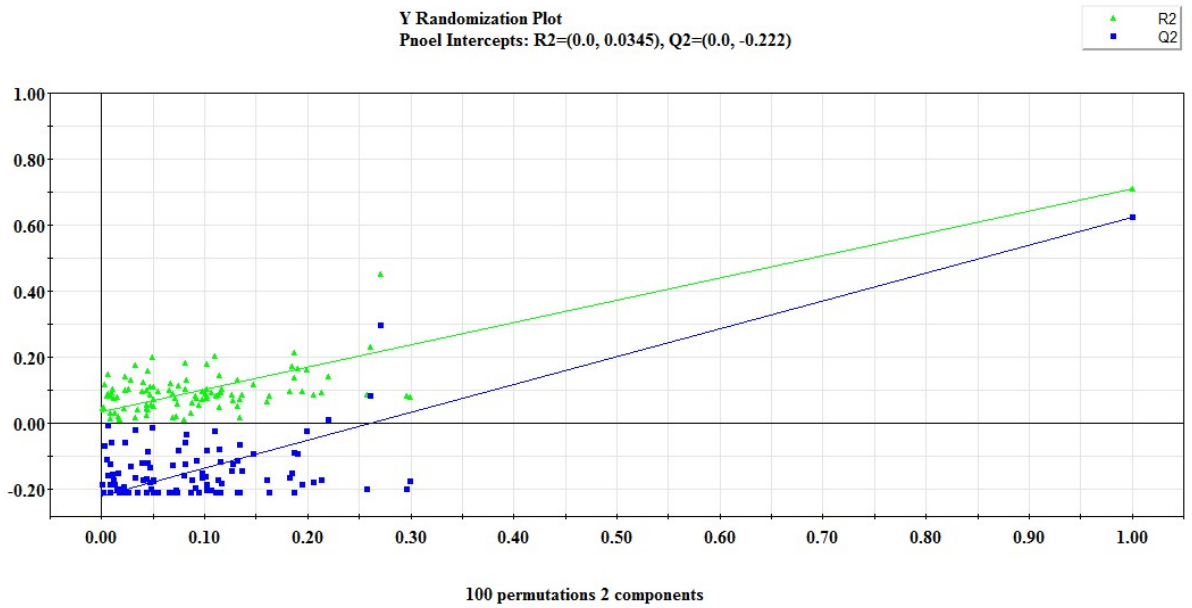

**Fig.S26. Y Randomization plot of Model IM2 (chronic Toxicity; pNOEL endpoint)**

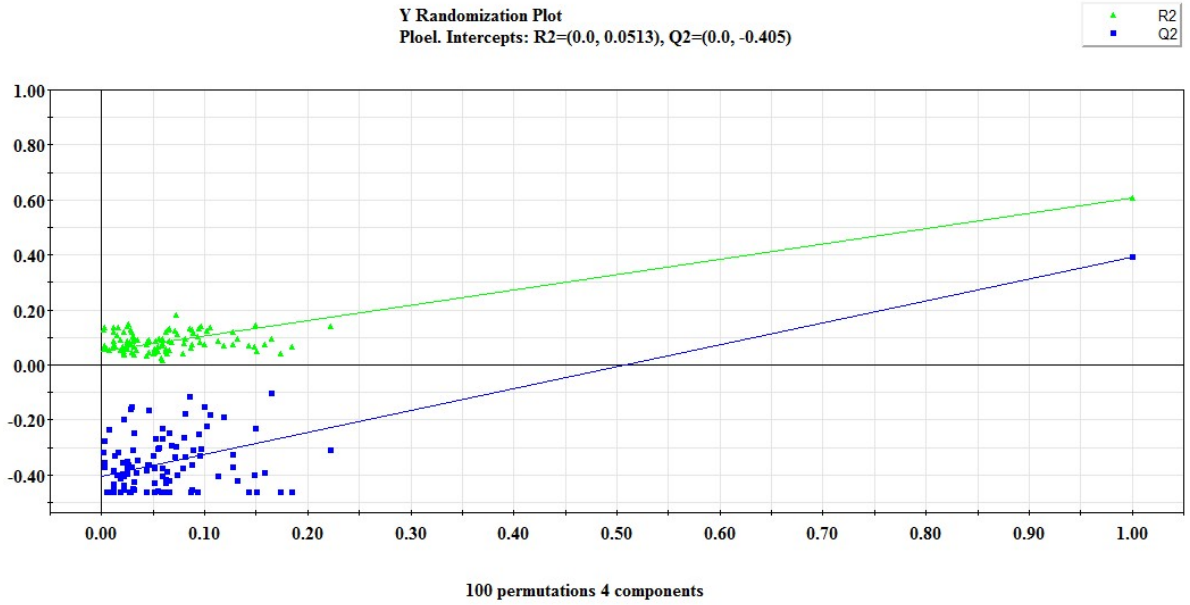

**Fig.S27. Y Randomization plot of Model IM3 (sub-chronic Toxicity; pLOEL endpoint)**

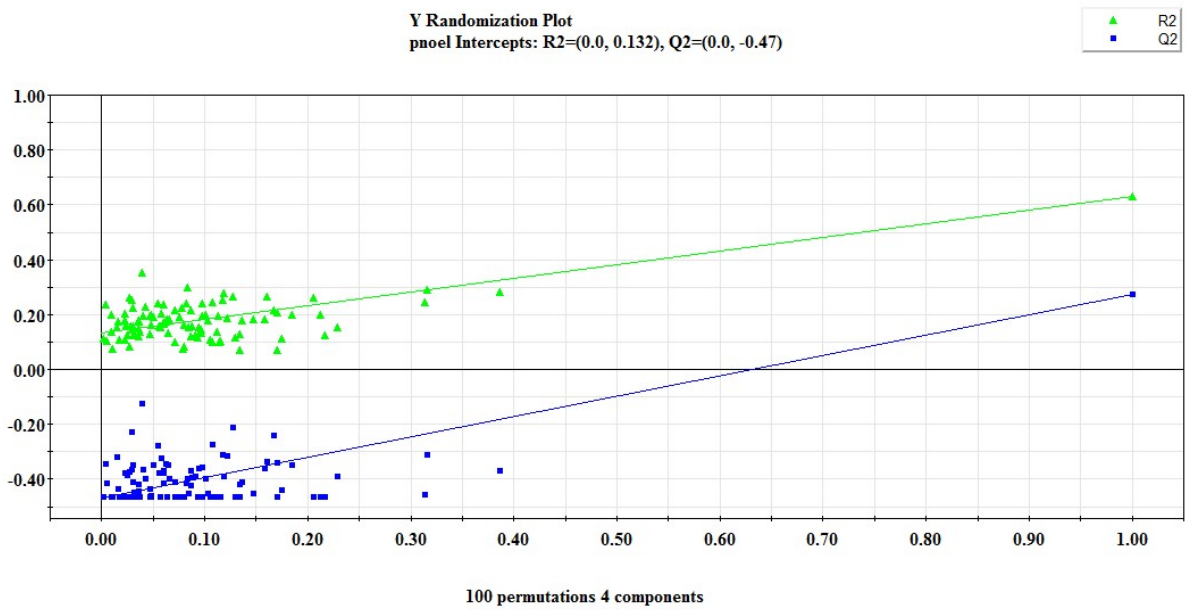

**Fig.S28. Y Randomization plot of Model IM4 (sub-chronic Toxicity; pNOEL endpoint)**

**Table S1: Top 10 toxic pesticides predicted from our developed models**



**Top 10 toxic pesticides predicted from our developed models**

**IMI: pLOEL chronic toxicity**

| <b>Compound</b>       | <b>Safety and Hazardous</b>                                                                                                                                                                                                      | <b>Compound</b>            | <b>Safety and hazardous</b>                                                                                                                                                                                                                                                                                                                                                                                                                      |
|-----------------------|----------------------------------------------------------------------------------------------------------------------------------------------------------------------------------------------------------------------------------|----------------------------|--------------------------------------------------------------------------------------------------------------------------------------------------------------------------------------------------------------------------------------------------------------------------------------------------------------------------------------------------------------------------------------------------------------------------------------------------|
| <b>Chlorpyrifos</b>   | Acute toxic and environmental hazards. High levels may result in severe sweating, loss of bowel control, severe muscle tremors, seizures, loss of consciousness, coma, or death [S1].                                            | <b>Chlorpyrifos-methyl</b> | Irritant, environmental hazards. Neurotoxic effects have also been linked to poisoning with OP pesticides causing four neurotoxic effects in humans: cholinergic syndrome, intermediate syndrome, organophosphate-induced delayed polyneuropathy (OPIDP), and chronic organophosphate-induced neuropsychiatric disorder (COPIND). These syndromes result from acute and chronic exposure to OP pesticides [S2].                                  |
| <b>Chlorprazophos</b> | Breathing or ingesting chlorpyrifos may result in a variety of nervous system effects, ranging from headaches, blurred vision, and salivation to seizures, coma, and death, depending on the amount and length of exposure [S3]. | <b>Chlorethoxyfos</b>      | Chronically toxic. Chlorethoxyfos is a cholinesterase or acetylcholinesterase (AChE) inhibitor. A cholinesterase inhibitor (or 'anticholinesterase') suppresses the action of acetylcholinesterase. Because of its essential function, chemicals that interfere with the action of acetylcholinesterase are potent neurotoxins, causing excessive salivation and eye-watering in low doses, followed by muscle spasms and ultimately death [S4]. |
| <b>Dialifos</b>       | Acute toxic, environmental hazards. Organophosphates & carbamates, acute poisoning [S5].                                                                                                                                         | <b>Fenmezoditiaz</b>       | Threshold of Toxicological Concern (Cramer Class): High (class III) [S6].                                                                                                                                                                                                                                                                                                                                                                        |
| <b>Anilofos</b>       | Irritant, Organophosphorus herbicides, Acute Tox. 4 (100%)                                                                                                                                                                       | <b>Isoxathion</b>          | Acute toxic, environmental hazards. Other Poison – Organophosphate [S8]                                                                                                                                                                                                                                                                                                                                                                          |

|                                        |                                                                                                         |                |                                                                                                                                                                                                                                  |
|----------------------------------------|---------------------------------------------------------------------------------------------------------|----------------|----------------------------------------------------------------------------------------------------------------------------------------------------------------------------------------------------------------------------------|
|                                        | [S7].                                                                                                   |                |                                                                                                                                                                                                                                  |
| Pyraclofos                             | Acute toxic, signal-danger [S9].                                                                        | Kelevan        | Acute toxic, environmental hazards. Hazardous to the aquatic environment (chronic) - category 2 [S10].                                                                                                                           |
| <b>IM2: pNOEL chronic toxicity</b>     |                                                                                                         |                |                                                                                                                                                                                                                                  |
| Etrimfos                               | Irritant, environmental hazards. Other Poison – Organophosphate [S11].                                  | Chlorphoxim    | Acute toxic [S12].                                                                                                                                                                                                               |
| Amidothioate                           | Organophosphate insecticide. Threshold of Toxicological Concern (Cramer Class): High (class III) [S13]. | Chlorprazophos | Breathing or ingesting chlorpyrifos may result in a variety of nervous system effects, ranging from headaches, blurred vision, and salivation to seizures, coma, and death, depending on the amount and length of exposure [S3]. |
| Phosacetim                             | Organophosphates & carbamates, acute poisoning [S14]                                                    | Chlorthion     | Irritant and environmental hazards. Organophosphates & carbamates, acute poisoning [S15]                                                                                                                                         |
| Propetamphos                           | Acute and environmental hazards. Other Poison – Organophosphate [S16].                                  | Isazofos       | Acute toxic, environmental, and health hazards. Other Poison – Organophosphate [S17].                                                                                                                                            |
| Azothoate                              | Irritant, Acute toxicity - category 4 [S18].                                                            | Menazon        | Irritant, Other Poison – Organophosphate [S19].                                                                                                                                                                                  |
| <b>IM3: pLOEL sub-chronic toxicity</b> |                                                                                                         |                |                                                                                                                                                                                                                                  |
| Camphechlor                            | Camphechlor causes liver tumors in mice and thyroid tumors in rats and                                  | Dieldrin       | Acute toxic, health, and environmental hazards. Cancer Classification: Group B2 Probable Human Carcinogen [S21]                                                                                                                  |

|                                        |                                                                                                                                                                                                   |                    |                                                                                                                                                                                                                                                                        |
|----------------------------------------|---------------------------------------------------------------------------------------------------------------------------------------------------------------------------------------------------|--------------------|------------------------------------------------------------------------------------------------------------------------------------------------------------------------------------------------------------------------------------------------------------------------|
|                                        | is classified by the IARC as a possible human carcinogen (group 2B) [S20].                                                                                                                        |                    |                                                                                                                                                                                                                                                                        |
| Merphos                                | Irritant.<br>Neurotoxin - Predominantly motor<br><br>Other Poison – Organophosphate [S22]                                                                                                         | Endrin             | Acute toxic, environmental hazards. Endrin poisoning affects primarily the nervous system. Exposure causes various harmful effects including hyperexcitability, severe central nervous system damage, and death. Endrin is also believed to cause birth defects [S23]. |
| Lime sulphur                           | Occupational hepatotoxin - Secondary hepatotoxins: the potential for toxic effects in the occupational setting is based on cases of poisoning by human ingestion or animal experimentation [S24]. | Copper II chloride | Acute toxic, environmental hazards. Very-high doses of copper can cause damage to your liver and kidneys, and can even cause death. Copper may induce allergic responses in sensitive individuals [S25].                                                               |
| Methiotepa                             | Myelosuppression [S26]                                                                                                                                                                            | Tetcyclacis        | Acute toxic [S27].                                                                                                                                                                                                                                                     |
| Cadusafos                              | Acute toxic and environmental hazards.<br>Other Poison - Organophosphate [S28].                                                                                                                   | Chlorphonium       | Acute toxic [S29].                                                                                                                                                                                                                                                     |
| <b>IM4: pNOEL sub-chronic toxicity</b> |                                                                                                                                                                                                   |                    |                                                                                                                                                                                                                                                                        |

|                  |                                                                                                          |                           |                                                                                                        |
|------------------|----------------------------------------------------------------------------------------------------------|---------------------------|--------------------------------------------------------------------------------------------------------|
| Flupoxam         | Environmental hazards [S30]                                                                              | Phosmet                   | Acute toxic, health and environmental hazards [S31].                                                   |
| Ethoprophos      | Acute and environmental hazards.<br>Cancer Classification: Likely to be<br>Carcinogenic to Humans [S32]. | Triflusulfuron            | Chronic and long-term toxic effects [S33].                                                             |
| Trifloxysulfuron | Expected chronic toxicity [S34].                                                                         | Triflusulfuron-<br>methyl | Health and environmental hazards<br>Hazardous to the aquatic environment (chronic) - category 1 [S35]. |
| Dialifos         | Acute toxic, environmental hazards.<br>Organophosphates & carbamates,<br>acute poisoning [S5].           | Amidithion                | Irritant, acute toxic [S36].                                                                           |
| Mecarphon        | Chronic effects [S37].                                                                                   | Lythidathion              | Acute toxic, dangerous organophosphate substance. Short and long-term health effects [S38-39].         |

## References:

- S1. <https://pubchem.ncbi.nlm.nih.gov/compound/2730>
- S2. <https://pubchem.ncbi.nlm.nih.gov/compound/21803>
- S3. <https://www.cdc.gov/TSP/ToxFAQs/ToxFAQsDetails.aspx?faqid=494&toxid=88#:~:text=Highlights,amount%20and%20length%20of%20exposure.>
- S4. <https://pubchem.ncbi.nlm.nih.gov/compound/91655>
- S5. <https://pubchem.ncbi.nlm.nih.gov/compound/25146>
- S6. <http://sitem.herts.ac.uk/aeru/ppdb/en/Reports/3363.htm#none>
- S7. <https://pubchem.ncbi.nlm.nih.gov/compound/91687>
- S8. <https://pubchem.ncbi.nlm.nih.gov/compound/29307>
- S9. <https://pubchem.ncbi.nlm.nih.gov/compound/93460>
- S10. <https://pubchem.ncbi.nlm.nih.gov/compound/20226>
- S.11 <https://pubchem.ncbi.nlm.nih.gov/compound/37995>
- S.12 <https://pubchem.ncbi.nlm.nih.gov/compound/5360461>
- S13. <http://sitem.herts.ac.uk/aeru/ppdb/en/Reports/2702.htm>
- S14. <https://pubchem.ncbi.nlm.nih.gov/compound/9570168>
- S15. <https://pubchem.ncbi.nlm.nih.gov/compound/10372>
- S16. <https://pubchem.ncbi.nlm.nih.gov/compound/5372405>
- S17. <https://pubchem.ncbi.nlm.nih.gov/compound/39223>
- S18. <https://pubchem.ncbi.nlm.nih.gov/compound/79914>
- S19. <https://pubchem.ncbi.nlm.nih.gov/compound/6543>
- S20. <https://www.sciencedirect.com/topics/agricultural-and-biological-sciences/toxaphene>
- S21. <https://pubchem.ncbi.nlm.nih.gov/compound/969491>
- S22. <https://pubchem.ncbi.nlm.nih.gov/compound/9011>
- S23. <https://pubchem.ncbi.nlm.nih.gov/compound/3048>
- S24. <https://pubchem.ncbi.nlm.nih.gov/compound/121494065>
- S25. <https://pubchem.ncbi.nlm.nih.gov/compound/11969527>
- S26. <https://go.drugbank.com/drugs/DB04572>

- S27. <https://pubchem.ncbi.nlm.nih.gov/compound/92396>
- S.28 <https://pubchem.ncbi.nlm.nih.gov/compound/91752>
- S29. <https://pubchem.ncbi.nlm.nih.gov/compound/8286>
- S30. <https://pubchem.ncbi.nlm.nih.gov/compound/86353>
- S31. <https://pubchem.ncbi.nlm.nih.gov/compound/12901>
- S32. <https://pubchem.ncbi.nlm.nih.gov/compound/3289>
- S33. [https://www3.epa.gov/pesticides/chem\\_search/hhbp/R038432.pdf](https://www3.epa.gov/pesticides/chem_search/hhbp/R038432.pdf)
- S34. <https://www.apvma.gov.au/sites/default/files/publication/14086-prs-trifloxysulfuron.pdf>
- S35. <https://pubchem.ncbi.nlm.nih.gov/compound/92434>
- S36. <https://pubchem.ncbi.nlm.nih.gov/compound/13525>
- S37. <https://pubmed.ncbi.nlm.nih.gov/7344408/>
- S38. <https://www.ncbi.nlm.nih.gov/pmc/articles/PMC6786676>.
- S39. <https://pubmed.ncbi.nlm.nih.gov/1516789/>
